# Supplementary material for: NHC–amine Ru complex catalyzed selective mono-N-methylation of amines with methanol: understanding the effect of amine ligands
Source: Royal Society of Chemistry journal article supplement (doi:10.1039/d3qo01097j), 2023-11-14
Supplement: d3qo01097j1.pdf [file d3qo01097j1.pdf]

*Electronic Supplementary Information (ESI)*

**NHC-Amine Ru complex catalyzed selective mono N-methylation of amines with methanol: understanding the effect of amine ligands**

Xiuju Cai,<sup>+a</sup> Xiaoyu Zhou<sup>+b</sup> and Ming Huang<sup>\*a</sup>

[a] *School of pharmacy, School of clinical pharmacy, Guangdong Pharmaceutical University, Guangzhou 510006, P. R. China. Email: 1529236883@qq.com*

[b] *School of Materials Science & Engineering, PCFM Lab, School of Chemistry, Sun Yat-sen University, Guangzhou 510275, P. R.*

+ These authors contributed equally to this work.

---

## *Table of Contents*

|                                                               |    |
|---------------------------------------------------------------|----|
| I. General Information.....                                   | 3  |
| II. Preparation of the Ligands and the NHC-Ru Complexes ..... | 4  |
| III. Single crystal X-Ray diffraction of Ru4 .....            | 10 |
| IV. The <i>N</i> -methylation of Amines with Methanol .....   | 12 |
| V. Mechanism studies .....                                    | 26 |
| VI. References.....                                           | 45 |
| VII. NMR Spectra .....                                        | 48 |

---

## I. General Information

Unless otherwise stated, all manipulations were carried out under dry nitrogen using conventional Schlenk or glove box techniques. Reagents were purchased from Energy-Chemical and Aladdin. These reagents were used without further purification. Analytical thin-layer chromatography (TLC) was conducted with TLC plates (Silica gel GF254, Qingdao Haiyang). Column chromatography was performed on silica gel 300-400 mesh.

NMR spectra were recorded using a Bruker 400 MHz spectrometer, and chemical shifts are reported relative to TMS for  $^1\text{H}$  and  $^{13}\text{C}$ . GC analyses were recorded in a Shimadzu GC-2014C device equipped with a Wondacap 1 column. ESI-MS spectra were taken on a Shimadzu LCMS-2010 instrument. High resolution mass spectrometric (HRMS) data were obtained using an LTQ Orbitrap Elite instrument, using a sample concentration of approximately 1 ppm.

## II. Preparation of the Ligands and the NHC-Ru Complexes

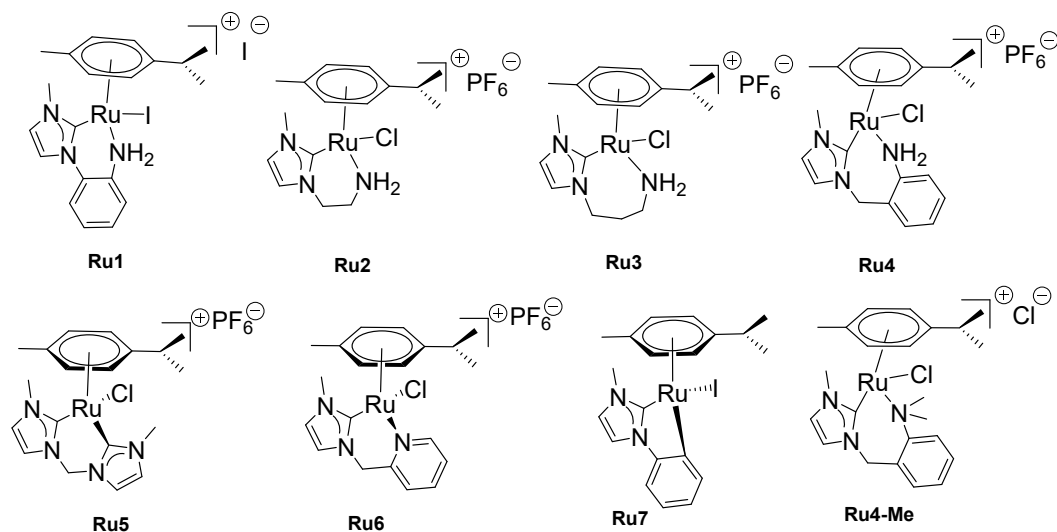

**Scheme S1.** NHC-Ru complexes **Ru1-Ru7**, and **Ru4-Me** used in this study.

The NHC-Ru Complexes **Ru1**<sup>1</sup>, **Ru2**<sup>2</sup>, **Ru5**<sup>3</sup>, **Ru6**<sup>4</sup>, and **Ru7**<sup>5</sup> were synthesized according to the references.

The synthesis of **Ru3** is illustrated in Scheme S2.

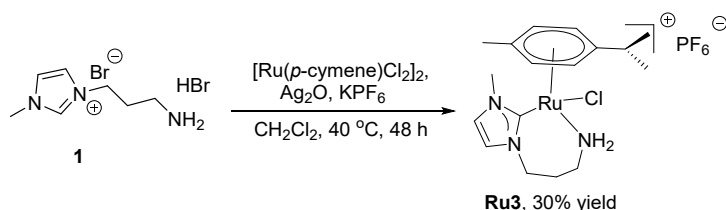

**Scheme S2.** The synthesis of **Ru3**.

### Complex **Ru3**

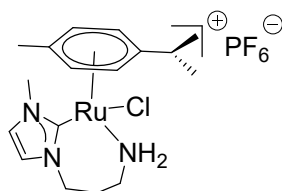

A 50 mL three-necked flask was charged **1**<sup>6</sup> (0.300 g, 1.0 mmol),  $[(p\text{-cymene})\text{RuCl}_2]_2$  (0.258 g, 0.42 mmol),  $\text{Ag}_2\text{O}$  (0.277 g, 1.2 mmol),  $\text{KPF}_6$  (0.184 g, 1.0 mmol) and  $\text{CH}_2\text{Cl}_2$  (100 mL). The reaction mixture was stirred at 40 °C for 48 h in the dark under  $\text{N}_2$  atmosphere. After cooling to rt, the mixture was filtered, and the filtrate was evaporated under reduced pressure. Then the crude mixture was purified by re-crystallization from  $\text{CH}_2\text{Cl}_2$ /ethyl ether. After that, the mixture was purified further by column chromatography ( $\text{SiO}_2$ ,  $\text{CH}_2\text{Cl}_2$ : MeOH = 20: 1), giving the product as yellow solid (0.167g, 30% yield).  $^1\text{H}$  NMR (400 MHz, Methylene Chloride- $d_2$ )  $\delta$  7.15 (d,  $J$  = 1.9

Hz, 1H), 7.08 (d,  $J = 1.9$  Hz, 1H), 5.74 (d,  $J = 5.9$  Hz, 1H), 5.47 (d,  $J = 5.9$  Hz, 1H), 5.42 (d,  $J = 5.9$  Hz, 1H), 5.28 (d,  $J = 6.0$  Hz, 1H), 4.45 – 4.31 (m, 2H), 4.12 – 4.06 (m, 1H), 3.91 (s, 3H), 3.27 (d,  $J = 11.9$  Hz, 1H), 2.90 – 2.77 (m, 2H), 2.21 – 2.10 (m, 1H), 1.96 (s, 3H), 1.86 – 1.75 (m, 2H), 1.26 (d,  $J = 7.0$  Hz, 3H), 1.14 (d,  $J = 6.8$  Hz, 3H);  $^{13}\text{C}$  NMR (101 MHz, Methylene Chloride- $d_2$ )  $\delta$  175.08, 124.86, 122.68, 112.43, 100.69, 85.85, 84.86, 84.13, 81.92, 45.81, 40.55, 38.95, 31.25, 28.49, 24.24, 20.39, 18.52;  $^{31}\text{P}$  NMR (162 MHz, Methylene Chloride- $d_2$ )  $\delta$  -130.98, -135.38, -139.77, -144.17, -148.57, -152.96, -157.36; HRMS (ESI,  $m/z$ ): calcd for  $\text{C}_{17}\text{H}_{27}\text{ClN}_3\text{Ru}$   $[\text{M} - \text{PF}_6]^+$  410.0931, found 410.0925.

The synthesis of **Ru4** is illustrated in Scheme S3.

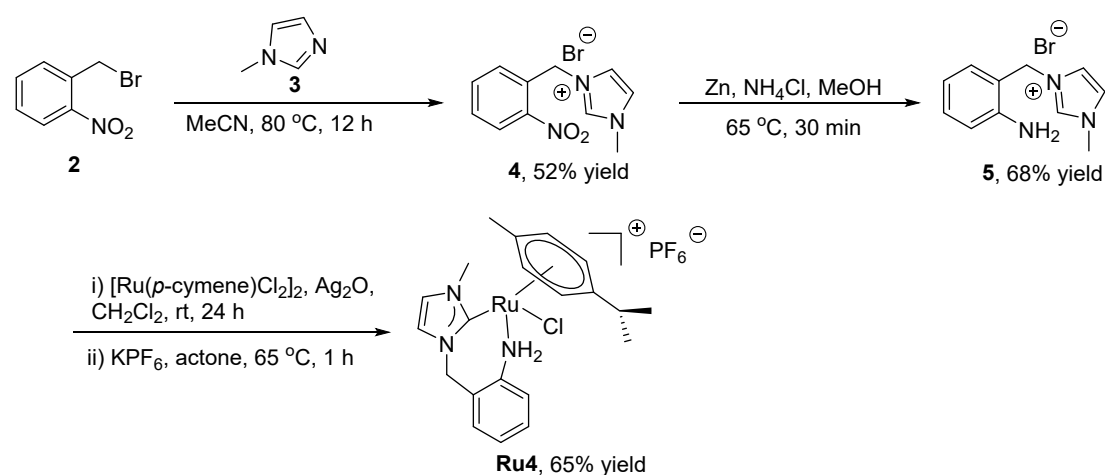

**Scheme S3.** The synthesis of **Ru4**.

1-methyl-3-(2-nitrobenzyl)-1H-imidazol-3-ium bromide (**4**)<sup>7</sup>

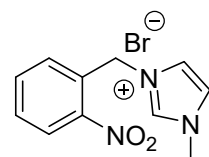

A 250 mL three-necked flask was charged 2-nitrobenzyl bromide **2** (10.36 g, 48 mmol), 1-methylimidazole **3** (4.0 mL, 50 mmol) and MeCN (20 mL). The reaction mixture was stirred at 80 °C for 12 h under  $\text{N}_2$  atmosphere. After cooling to room temperature, the precipitate was filtered, and washed with MeCN, and then with diethyl ether. Drying the precipitate under vacuum gave complex **4** as a white solid with good purity and yields. Yield: 52%.  $^1\text{H}$  NMR (400 MHz,  $\text{DMSO-}d_6$ )  $\delta$  9.25 (s, 1H), 8.21 (dd,  $J = 8.2, 1.1$  Hz, 1H), 7.84 – 7.79 (m, 3H), 7.73 – 7.69 (m, 1H), 7.37 (d,  $J = 7.6$  Hz, 1H), 5.81 (s, 2H), 3.91 (s, 3H);  $^{13}\text{C}$  NMR (101 MHz,  $\text{DMSO-}d_6$ )  $\delta$  147.50, 137.41, 134.69, 130.38, 130.15, 129.75, 125.33, 124.01, 122.79, 49.29, 36.00; MS (ESI)  $[\text{M} - \text{Br}]^+ = 218.11$ .

3-(2-aminobenzyl)-1-methyl-1H-imidazol-3-ium bromide (**5**)

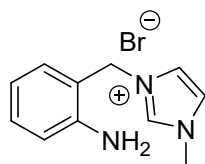

A 150 mL three-necked flask was charged **4** (0.83 g, 2.8 mmol), Zn powder (3.64g, 55.7 mmol), NH<sub>4</sub>Cl (0.74g, 13.9 mmol), and MeOH (30 mL). The reaction mixture was stirred at 65 °C for 30 min under N<sub>2</sub> atmosphere. After cooling to room temperature, the precipitate was filtered, and the filtrate was evaporated under reduced pressure. The resultant yellowish oil was dissolved with a small amount of methanol, and the methanol solution was kept at 0-8 °C overnight. After that, the methanol solution was filtered, and the filtrate was evaporated under reduced pressure to give the final product as a yellowish oil. The product would turn into yellowish solid when placed at room temperature for a period of time. Yield: 68%. <sup>1</sup>H NMR (400 MHz, DMSO-*d*<sub>6</sub>) δ 9.08 (s, 1H), 7.67 (dd, *J* = 4.2, 2.2 Hz, 2H), 7.14 – 7.07 (m, 2H), 6.72 (d, *J* = 8.0 Hz, 1H), 6.58 (t, *J* = 7.4 Hz, 1H), 5.39 (s, 2H), 5.32 (s, 2H), 3.85 (s, 3H); <sup>13</sup>C NMR (101 MHz, DMSO-*d*<sub>6</sub>) δ 147.02, 136.22, 130.69, 130.02, 123.57, 122.41, 117.05, 116.41, 115.67, 48.99, 35.82; HRMS (ESI, *m/z*): calcd for C<sub>11</sub>H<sub>14</sub>N<sub>3</sub> [M – Br]<sup>+</sup> 188.1182, found 188.1179.

#### Complex Ru4

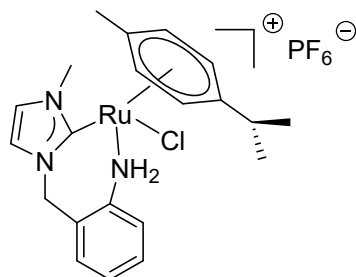

A 250 mL three-necked flask was charged **5** (0.4 g, 1.5 mmol), [(*p*-cymene)RuCl<sub>2</sub>]<sub>2</sub> (0.485g, 0.8 mmol), Ag<sub>2</sub>O (0.185g, 0.85 mmol), and CH<sub>2</sub>Cl<sub>2</sub> (100 mL). The reaction mixture was stirred at room temperature overnight in the dark under N<sub>2</sub> atmosphere. The mixture was filtered, and the filtrate was evaporated under reduced pressure. Then the crude mixture was dissolved in acetone (150 mL). KPF<sub>6</sub> (2.93 g, 16 mmol) was added to the solution, which was then heated at reflux for 1 h. The solvent was evaporated under reduced pressure and the crude solid redissolved in CH<sub>2</sub>Cl<sub>2</sub> (50 mL). After that, the solution was filtered, and the filtrate was evaporated under reduced pressure. The resulting solid was recrystallized from CH<sub>2</sub>Cl<sub>2</sub>/ether, giving the product as yellow green solid. Yield: 65%. <sup>1</sup>H NMR (400 MHz, Methylene Chloride-*d*<sub>2</sub>) δ 7.66 (d, *J* = 12.0 Hz, 1H), 7.20 (d, *J* = 1.6 Hz, 1H), 7.14 – 7.12 (m, 1H), 7.06 – 7.04 (m, 2H), 6.98 (d, *J* = 1.6 Hz, 1H), 6.91 – 6.89 (m, 1H), 5.83 (d, *J* = 5.9 Hz, 1H), 5.68 (d, *J* = 5.9 Hz, 1H), 5.63 (d, *J* = 5.9 Hz, 1H), 5.57 (s, 1H), 5.54 (d, *J* = 8.2 Hz, 1H), 5.35 (s, 1H), 4.64 (d, *J* = 14.3 Hz, 1H), 3.75 (s, 3H), 2.83 (p, *J* = 6.9 Hz, 1H), 2.06 (s, 3H), 1.28 (d, *J* = 7.0 Hz, 3H), 1.17 (d, *J* = 6.8 Hz, 3H); <sup>13</sup>C NMR (101 MHz, ) δ 173.51, 139.17, 131.45, 129.76, 129.51, 127.03, 126.31, 124.90, 122.85, 112.71, 101.96, 87.53, 85.63,

83.38, 82.73, 51.05, 39.03, 31.56, 24.29, 20.96, 18.59;  $^{31}\text{P}$  NMR (162 MHz, Methylene Chloride- $d_2$ )  $\delta$  -131.06, -135.46, -139.85, -144.25, -148.64, -153.04, -157.43; HRMS (ESI,  $m/z$ ): calcd for  $\text{C}_{21}\text{H}_{27}\text{ClN}_3\text{Ru}$  [ $\text{M} - \text{PF}_6$ ] $^+$  458.0931, found 458.0934.

The synthesis of **Ru4-Me** is illustrated in Scheme S4.

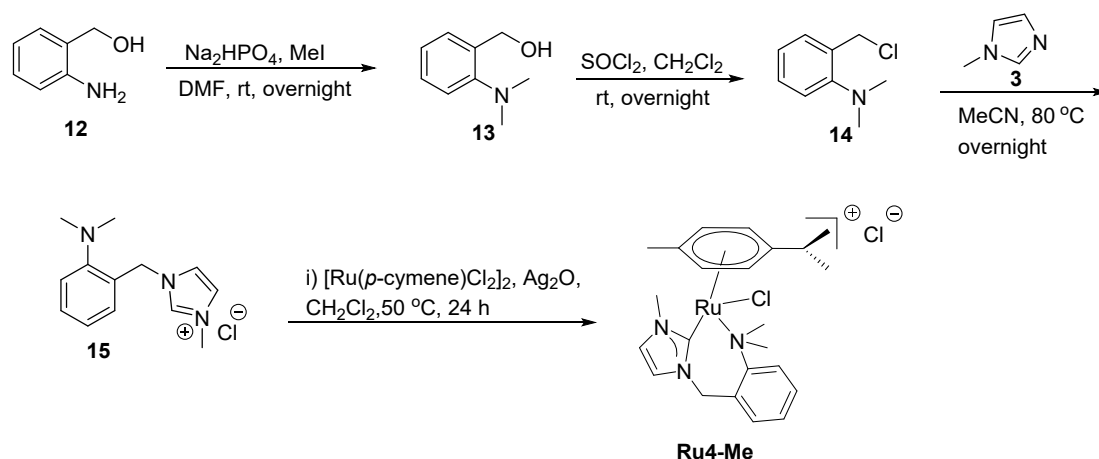

**Scheme S4.** The synthesis of **Ru4-Me**.

(2-(dimethylamino)phenyl)methanol (**13**)<sup>8</sup>

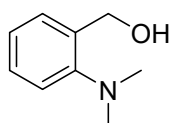

A 250 mL three-necked flask was charged (2-aminophenyl)methanol **12** (5.0 g, 40.6 mmol),  $\text{Na}_2\text{HPO}_4$  (20.8 g, 146 mmol), and dry DMF (150 mL). Methyl iodide (6 mL, 97 mmol) was added, and the reaction mixture was stirred at rt overnight under  $\text{N}_2$  atmosphere. Then, the reaction mixture was diluted with water (1 L) and extracted with diethyl ether ( $3 \times 300$  mL). The organic layers were combined, washed with brine ( $2 \times 150$  mL) and  $\text{H}_2\text{O}$  ( $1 \times 200$  mL), and dried over anhydrous  $\text{Na}_2\text{SO}_4$ . After filtration, the solvent was removed on a rotary evaporator to furnish 5.6 g (91%) of the product **13** in the form of a colorless oil.

2-(chloromethyl)-N,N-dimethylaniline (**14**)<sup>8</sup>

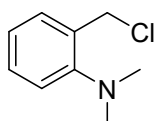

A 250 mL three-necked flask was charged (2-(dimethylamino)phenyl)methanol **13** (5.5 g, 36.4 mmol), and dry  $\text{CH}_2\text{Cl}_2$  (130 mL). The mixture was cooled to  $0\text{ }^\circ\text{C}$ , and  $\text{SOCl}_2$  was added (4.8 mL, 66 mmol). The mixture was stirred at  $0\text{ }^\circ\text{C}$  for 20 min and then overnight at rt under  $\text{N}_2$  atmosphere. The reaction mixture was diluted with  $\text{CH}_2\text{Cl}_2$

(400 mL) and washed with 10% aqueous sodium bicarbonate to neutralize  $\text{SOCl}_2$  and acid. The organic layer was dried over anhydrous  $\text{Na}_2\text{SO}_4$  and filtered, and the solvent was removed on a rotary evaporator to afford **14** as a yellowish oil (5.2g, 85%) which was used without further purification.

#### 1-(2-(dimethylamino)benzyl)-3-methyl-1H-imidazol-3-ium chloride (**15**)

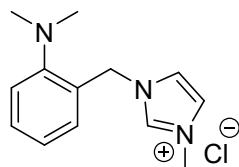

A 250 mL three-necked flask was charged 2-(chloromethyl)-*N,N*-dimethylaniline **14** (1.69 g, 10 mmol), 1-methylimidazole **3** (0.88 mL, 11 mmol) and MeCN (40 mL). The reaction mixture was stirred at 80 °C overnight under  $\text{N}_2$  atmosphere. After cooling to room temperature, the solvent was removed on a rotary evaporator. The resulting solid was recrystallized from  $\text{CH}_2\text{Cl}_2$ /ether, giving the product as a white solid (84% yield).  $^1\text{H}$  NMR (400 MHz,  $\text{DMSO}-d_6$ )  $\delta$  9.41 (s, 1H), 7.79 (t,  $J = 1.8$  Hz, 1H), 7.75 (t,  $J = 1.8$  Hz, 1H), 7.36 (td,  $J = 7.6, 1.7$  Hz, 1H), 7.27 (dd,  $J = 8.1, 1.3$  Hz, 1H), 7.16 (dd,  $J = 7.6, 1.7$  Hz, 1H), 7.09 (td,  $J = 7.4, 1.3$  Hz, 1H), 5.50 (s, 2H), 3.89 (s, 3H), 2.62 (s, 6H);  $^{13}\text{C}$  NMR (101 MHz,  $\text{DMSO}-d_6$ )  $\delta$  152.70, 137.09, 129.73, 129.64, 129.08, 124.00, 123.67, 122.68, 120.65, 48.56, 44.84, 35.79; HRMS (ESI,  $m/z$ ): calcd for  $\text{C}_{13}\text{H}_{18}\text{N}_3$   $[\text{M} - \text{Cl}]^+$  216.1495, found 216.1492.

#### Complex Ru4-Me

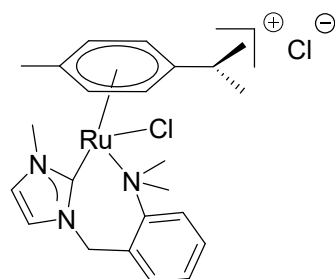

A 150 mL three-necked flask was charged **15** (0.25 g, 1.0 mmol),  $[(p\text{-cymene})\text{RuCl}_2]_2$  (0.306g, 0.5 mmol),  $\text{Ag}_2\text{O}$  (0.185g, 0.85 mmol), and  $\text{CH}_2\text{Cl}_2$  (30 mL). The reaction mixture was stirred at 50 °C overnight in the dark under  $\text{N}_2$  atmosphere. The mixture was filtered, and the filtrate was evaporated under reduced pressure. Then the crude mixture was purified by re-crystallization from  $\text{CH}_2\text{Cl}_2$ /ethyl ether. After that, the mixture was purified further by column chromatography ( $\text{SiO}_2$ , petroleum  $\text{CH}_2\text{Cl}_2$ : MeOH = 20: 1), giving the product as a yellow solid (0.21g, 40% yield).  $^1\text{H}$  NMR (400 MHz, Chloroform-*d*)  $\delta$  7.28 – 7.25 (m, 1H), 7.15 (d,  $J = 8.0$  Hz, 1H), 7.04 – 6.94 (m, 3H), 6.82 (t,  $J = 1.5$  Hz, 1H), 5.74 (d,  $J = 113.9$  Hz, 2H), 5.32 – 5.30 (m, 2H), 5.02 (d,  $J = 5.7$  Hz, 2H), 4.04 (s, 3H), 2.95 - 2.88 (m, 1H), 2.74 (s, 6H), 2.06 (s, 3H), 1.24 (d,  $J = 6.9$  Hz, 6H);  $^{13}\text{C}$  NMR (101 MHz, Chloroform-*d*)  $\delta$  174.52, 152.23, 132.29, 128.45, 128.30, 123.75, 123.53, 123.40, 119.26, 108.33, 99.03, 85.16, 82.53, 50.95, 45.09,



---

39.83, 30.83, 18.80;  $^{13}\text{C}$  NMR (101 MHz, Chloroform-*d*)  $\delta$  174.52, 152.23, 132.29, 128.45, 128.30, 123.75, 123.53, 123.40, 119.26, 108.33, 99.03, 85.16, 85.53, 50.95, 45.09, 39.83, 30.83, 22.33, 18.80; HRMS (ESI, *m/z*): calcd for  $\text{C}_{23}\text{H}_{31}\text{ClN}_3\text{Ru}$  [ $\text{M} - \text{Cl}$ ] $^+$  486.1244, found 486.1249.

### III. Single crystal X-Ray diffraction of Ru4

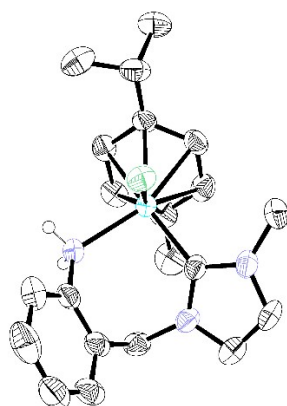

Figure S1. Molecular structure of complex **Ru4** with thermal ellipsoids shown at 50% probability level. Hydrogen atoms and PF<sub>6</sub> group were omitted for clarity.

**Table S1.** Crystal data and structure refinement for **Ru4**.

|                                        |                                                                    |
|----------------------------------------|--------------------------------------------------------------------|
| Identification code                    | CCDC 2281550                                                       |
| Empirical formula                      | C <sub>21</sub> H <sub>27</sub> ClN <sub>3</sub> RuPF <sub>6</sub> |
| Formula weight                         | 603.75                                                             |
| Temperature/K                          | 296.15                                                             |
| Crystal system                         | trigonal                                                           |
| Space group                            | R-3c                                                               |
| a/Å                                    | 16.2982(12)                                                        |
| b/Å                                    | 16.2982(12)                                                        |
| c/Å                                    | 96.084(11)                                                         |
| $\alpha$ /°                            | 90                                                                 |
| $\beta$ /°                             | 90                                                                 |
| $\gamma$ /°                            | 120                                                                |
| Volume/Å <sup>3</sup>                  | 22103(4)                                                           |
| Z                                      | 12                                                                 |
| $\rho_{\text{calc}}/\text{cm}^3$       | 1.588                                                              |
| $\mu/\text{mm}^{-1}$                   | 1.139                                                              |
| F(000)                                 | 10632.0                                                            |
| Crystal size/mm <sup>3</sup>           | 0.23 × 0.16 × 0.06                                                 |
| Radiation                              | MoK $\alpha$ ( $\lambda$ = 0.71073)                                |
| 2 $\theta$ range for data collection/° | 4.454 to 54.978                                                    |
| Index ranges                           | -21 ≤ h ≤ 21, -21 ≤ k ≤ 19, -123 ≤ l ≤ 124                         |
| Reflections collected                  | 59192                                                              |
| Independent reflections                | 5641 [R <sub>int</sub> = 0.0987, R <sub>sigma</sub> = 0.0409]      |

---

|                                                |                                  |
|------------------------------------------------|----------------------------------|
| Data/restraints/parameters                     | 5641/0/275                       |
| Goodness-of-fit on $F^2$                       | 1.051                            |
| Final R indexes [ $I \geq 2\sigma(I)$ ]        | $R_1 = 0.0627$ , $wR_2 = 0.1821$ |
| Final R indexes [all data]                     | $R_1 = 0.0809$ , $wR_2 = 0.1976$ |
| Largest diff. peak/hole / $e \text{ \AA}^{-3}$ | 1.21/-3.71                       |

---

## IV. The *N*-methylation of Amines with Methanol

### 1, GC analysis method for the condition optimization.

GC analysis method:

Injector: Mode: Split; temp.: 330 °C; Gas: N<sub>2</sub> Pressure: 1.34 bar; Split ratio: 39:1; Split flow: 67.6 mL/min.

Column: Wondacap 1 column Capillary column (30 m x 0.25 mm); Nominal film thickness: 0.250 μm; Temperature program: Initial temperature 100 °C, hold for 0 min, heat to 120 °C with 5 °C/min, hold for 0 min, then heat to 200 °C with 50 °C/min, hold for 5 min.

Initial Flow: 1.62 mL/min; Average velocity: 39.4 cm/sec, Pressure: 1.34 bar. Detector (FID): Temp.: 330 °C; Hydrogen flow: 40.0 mL/min; Air flow: 400.0 mL/min.

Preparation of GC sample:

Firstly, 1 equiv. of internal standard (mesitylene) was added to the reaction mixture. Then, the reaction mixture was diluted with 10 mL of CH<sub>2</sub>Cl<sub>2</sub>, filtered through syringe filter and collected in GC vials for analysis.

Retention times: cyclohexylamine (**6a**): 2.28 min; *N*-methylcyclohexylamine (**8a**): 2.603 min; mesitylene: 2.871 min; *N,N*-dimethylcyclohexylamine (**8aa**): 2.97 min.

### 2. The condition optimization.

#### 2.1 General method for the condition optimization.

To a 15 mL seal tube in a glovebox, was added **Ru** (x mol%), base (y mol%), cyclohexylamine (**6a**, 0.5 mmol), and methanol (0.5 mL) in sequence. Then the tube was closed with a screw-top cap and removed from the glovebox. The reaction mixture was stirred at 110 °C for 9 h. After cooled to rt, 1 equiv. of internal standard (mesitylene) was added to the reaction mixture. Then, the reaction mixture was diluted with 10 mL of CH<sub>2</sub>Cl<sub>2</sub>, filtered through syringe filter and collected in GC vials for analysis.

We have performed the reaction at lower reaction temperatures. However, the yield of product **8a** was descended along with the reaction temperature decreasing (Table S2, entries 1-2). In addition, the influence of the amount of the MeOH on the reaction was investigated (Table S2, entries 3-7). When the amount of methanol is low, the yields of **8a** were sharply decreased (Table S2, entries 3-5). Inferior selectivity was observed when the amount of methanol increases to 1mL (Table S2, entry 7). These results indicated that the amount of methanol plays an important role in the activity and selectivity of the reaction.

**Table S2.** Further Optimization of the Reaction.<sup>a, b</sup>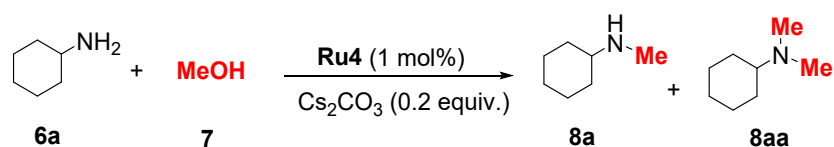

| entry          | Temperature (°C) | Methanol (mL) | Yield of <b>8a</b> (%) | Ratio ( <b>8a</b> : <b>8aa</b> ) |
|----------------|------------------|---------------|------------------------|----------------------------------|
| 1 <sup>c</sup> | 100              | 0.5           | 47                     | 96:4                             |
| 2 <sup>c</sup> | 90               | 0.5           | 19                     | 98:2                             |
| 3              | 110              | 0.1           | 0                      | -                                |
| 4              | 110              | 0.2           | 22                     | 99:1                             |
| 5              | 110              | 0.3           | 52                     | 98:2                             |
| 6              | 110              | 0.5           | 85                     | 90:10                            |
| 7              | 110              | 1             | 60                     | 74:25                            |

<sup>a</sup>Reaction conditions: 0.5 mmol **6a**, x mL MeOH, 1.0 mol% **Ru4**,  $\text{Cs}_2\text{CO}_3$ , y °C, 9h. <sup>b</sup>GC yields with mesitylene as an internal standard. <sup>c</sup>24 h

To a 15 mL seal tube in a glovebox, was added **Ru4** (1 mol%),  $\text{Cs}_2\text{CO}_3$  (20 mol%), 4-methoxybenzylamine (**6i**, 0.5 mmol), and methanol (0.5 mL) in sequence. Then the tube was closed with a screw-top cap and removed from the glovebox. The reaction mixture was stirred at 110 °C for 24 h. After cooled to rt, 1 equiv. of internal standard (1,3,5-trimethoxybenzene) was added to the reaction mixture. Then, the reaction mixture was diluted with 10 mL of  $\text{CH}_2\text{Cl}_2$ , filtered through syringe filter and collected in vials for analysis.

In this reaction, the *N*-mono-methylation product **8i** and dimethylation product **8ii** were obtained in 70% and 5% yields, respectively (Table S3 and Figure S2). In addition, a few byproducts (several signals ranging from 2.5 to 3.6 ppm were observed, Figure S2) besides the dimethylation product were observed. These results indicated that there are other side-products besides the dimethylation product were produced in the *N*-methylation reaction of aliphatic amines with methanol.

**Table S3.** Yields of **8i** and **8ii** were calculated by <sup>1</sup>H NMR Integration Ratio.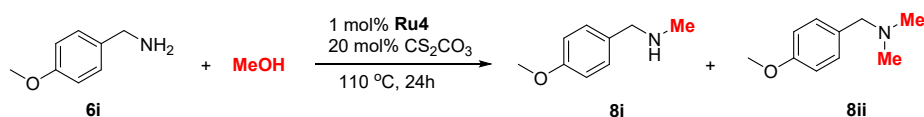

|                  | Internal standard (1,3,5-trimethoxybenzene) | <b>8i</b> | <b>8ii</b> |
|------------------|---------------------------------------------|-----------|------------|
| Signal $\delta$  | 6.11 (3H)                                   | 2.46 (3H) | 2.22 (6H)  |
| Integral Value   | 3.0                                         | 2.1       | 0.27       |
| Calculated ratio |                                             | 70%       | 5%         |

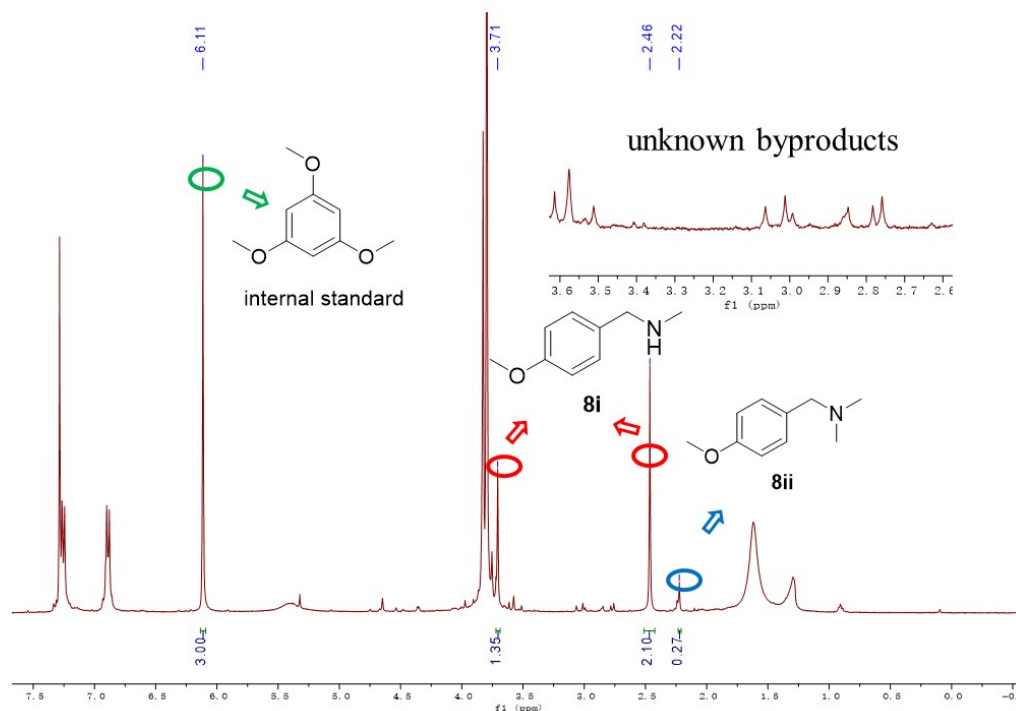

**Figure S2.**  $^1\text{H}$  NMR (400 MHz,  $\text{CDCl}_3$ ) spectrum of the *N*-methylation reaction of 4-methoxybenzylamine (**6i**) with methanol.

### 3. Substrate screening.

#### 3.1. Scope of the aliphatic amines.

##### General method for the substrate screening.

To a 15 mL seal tube in a glovebox, was added **Ru4** (1 mol%),  $\text{Cs}_2\text{CO}_3$  (20 mol%), aliphatic amines (0.5 mmol), and methanol (0.5 mL) in sequence. Then the tube was closed with a screw-top cap and removed from the glovebox. The reaction mixture was stirred at 110 °C for 24 h. After cooled to rt, *di-tert*-butyl dicarbonate (3.0 mmol), triethylamine (5.0 mmol), and dichloromethane (2 mL) were sequentially added, and the reaction mixture was stirred at room temperature overnight. The product was purified by column chromatography ( $\text{SiO}_2$ , petroleum ether: ethyl acetate = 80: 1).

*tert*-butyl cyclohexyl(methyl)carbamate (**9a**)<sup>9</sup>

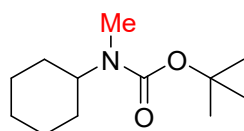

Colorless oil. 58% yield (62 mg).  $^1\text{H}$  NMR (400 MHz, Chloroform-*d*)  $\delta$  3.84 (brs, 1H), 2.70 (s, 3H), 1.78 – 1.73 (m, 2H), 1.68 – 1.59 (m, 3H), 1.45 (s, 9H), 1.37 – 1.24 (m, 4H), 1.09 – 1.02 (m, 1H);  $^{13}\text{C}$  NMR (101 MHz, Chloroform-*d*)  $\delta$  155.83, 79.18, 54.24, 30.48, 28.65, 28.35, 25.99, 25.76; MS  $[\text{M}+\text{Na}]^+ = 236.25$ .

*tert*-butyl cyclopentyl(methyl)carbamate (**9b**)<sup>10</sup>

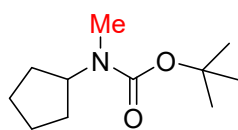

Colorless oil. 54% yield (54 mg). <sup>1</sup>H NMR (400 MHz, Chloroform-*d*) δ 4.41 (s, 1H), 2.69 (s, 3H), 1.79 – 1.69 (m, 2H), 1.70 – 1.58 (m, 2H), 1.55 – 1.43 (m, 4H), 1.43 (s, 9H); <sup>13</sup>C NMR (101 MHz, Chloroform-*d*) δ 156.03, 79.18, 56.54, 28.61, 28.57, 28.55, 24.20; MS [M+Na]<sup>+</sup> = 222.25.

*tert*-butyl-3,5-dimethyladamantan-1-yl(methyl)carbamate (**9c**)<sup>11</sup>

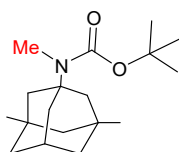

Colorless oil. 55% yield (81 mg). <sup>1</sup>H NMR (400 MHz, Chloroform-*d*) δ 2.84 (s, 3H), 2.13 (hept, *J* = 3.4 Hz, 1H), 1.91 (d, *J* = 3.0 Hz, 2H), 1.71 (d, *J* = 5.2 Hz, 4H), 1.45 (s, 9H), 1.37 – 1.30 (m, 2H), 1.27 – 1.23 (m, 2H), 1.12 – 1.10 (m, 2H), 0.83 (s, 6H); <sup>13</sup>C NMR (101 MHz, Chloroform-*d*) δ 155.97, 79.22, 57.87, 50.70, 46.39, 42.81, 38.81, 32.84, 30.74, 30.64, 30.37, 28.76; MS [M+Na]<sup>+</sup> = 316.47

*tert*-butyl methyl(octyl)carbamate (**9d**)<sup>11</sup>

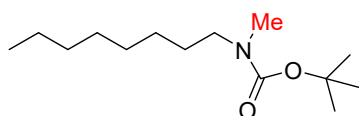

Colorless oil. 63% yield (77 mg). <sup>1</sup>H NMR (400 MHz, Chloroform-*d*) δ 3.17 (t, *J* = 7.3 Hz, 2H), 2.81 (s, 3H), 1.55 – 1.48 (m, 2H), 1.44 (s, 9H), 1.26 (s, 10H), 0.87 (t, *J* = 6.3 Hz, 3H); <sup>13</sup>C NMR (101 MHz, Chloroform-*d*) δ 156.00, 79.16, 48.94, 34.15, 31.94, 29.47, 29.40, 28.60, 27.92, 26.84, 22.77, 14.20; MS [M+Na]<sup>+</sup> = 266.34.

*tert*-butyl hexyl(methyl)carbamate (**9e**)

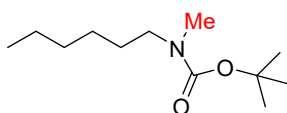

Colorless oil. 56% yield (60 mg). <sup>1</sup>H NMR (400 MHz, Chloroform-*d*) δ 3.17 (t, *J* = 7.2 Hz, 2H), 2.82 (s, 3H), 1.51 – 1.47 (m, 2H), 1.44 (s, 9H), 1.27 (s, 6H), 0.87 (t, *J* = 6.1 Hz, 3H); <sup>13</sup>C NMR (101 MHz, Chloroform-*d*) δ 155.93, 79.18, 48.93, 34.16, 31.76, 28.60, 27.90, 26.50, 22.76, 14.15; MS [M+Na]<sup>+</sup> = 238.58.

*tert*-butyl (3-methoxypropyl)(methyl)carbamate (**9f**)<sup>12</sup>

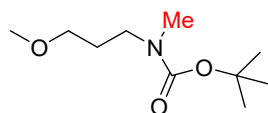

Colorless oil. 60% yield (61 mg).  $^1\text{H}$  NMR (400 MHz, Chloroform-*d*)  $\delta$  3.35 (t,  $J = 6.3$  Hz, 2H), 3.30 (s, 3H), 3.25 (t,  $J = 7.1$  Hz, 2H), 2.82 (s, 3H), 1.75 (p,  $J = 6.6$  Hz, 2H), 1.43 (s, 9H);  $^{13}\text{C}$  NMR (101 MHz, Chloroform-*d*)  $\delta$  155.91, 79.31, 70.27, 58.67, 46.13, 34.54, 28.55, 28.35, MS  $[\text{M}+\text{Na}]^+ = 226.22$ .

*tert*-butyl benzyl(methyl)carbamate (**9g**)<sup>13</sup>

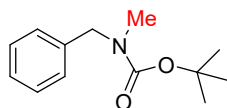

Colorless oil. 57% yield (63 mg).  $^1\text{H}$  NMR (400 MHz, Chloroform-*d*)  $\delta$  7.35 – 7.31 (m, 2H), 7.28 – 7.22 (m, 3H), 4.42 (s, 2H), 2.82 (s, 3H), 1.48 (s, 9H);  $^{13}\text{C}$  NMR (101 MHz, Chloroform-*d*)  $\delta$  156.21, 138.33, 128.71, 127.58, 127.38, 79.85, 52.69, 34.12, 28.67; MS  $[\text{M}+\text{Na}]^+ = 244.32$ .

*tert*-butyl methyl(4-methylbenzyl)carbamate (**9h**)<sup>11</sup>

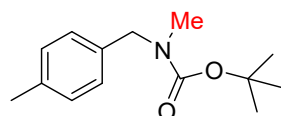

Colorless oil. 64% yield (75 mg).  $^1\text{H}$  NMR (400 MHz, Chloroform-*d*)  $\delta$  7.13 (s, 4H), 4.38 (s, 2H), 2.81 (s, 3H), 2.34 (s, 3H), 1.48 (s, 9H);  $^{13}\text{C}$  NMR (101 MHz, Chloroform-*d*)  $\delta$  (156.26 and 155.94), 136.88, 135.12, 129.32, (127.85 and 127.37), 79.66, (52.44 and 51.77), 33.85, 28.57, 21.17; MS  $[\text{M}+\text{Na}]^+ = 258.21$ .

*tert*-butyl (4-methoxybenzyl)(methyl)carbamate (**9i**)<sup>14</sup>

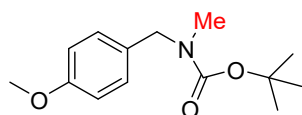

Colorless oil. 52% yield (65 mg).  $^1\text{H}$  NMR (400 MHz, Chloroform-*d*)  $\delta$  7.15 (d,  $J = 7.7$  Hz, 2H), 6.86 (d,  $J = 8.5$  Hz, 2H), 4.35 (s, 2H), 3.79 (s, 3H), 2.78 (s, 3H), 1.48 (s, 9H);  $^{13}\text{C}$  NMR (101 MHz, Chloroform-*d*)  $\delta$  158.95, 130.28, (129.12 and 128.74), 114.00, 79.61, 55.36, (52.17 and 51.46), 33.75, 28.59; MS  $[\text{M}+\text{Na}]^+ = 274.30$ .

*tert*-butyl (4-chlorobenzyl)(methyl)carbamate (**9j**)<sup>15</sup>

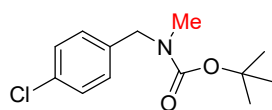

Colorless oil. 51% yield (65 mg).  $^1\text{H}$  NMR (400 MHz, Chloroform-*d*)  $\delta$  7.29 (d,  $J = 8.2$  Hz, 2H), 7.15 (d,  $J = 7.3$  Hz, 2H), 4.37 (s, 2H), 2.81 (s, 3H), 1.47 (s, 9H);  $^{13}\text{C}$  NMR (101 MHz, Chloroform-*d*)  $\delta$  (156.10 and 155.68), 136.65, 132.96, 129.05, 128.67,



79.87, (52.03 and 51.39), 33.98, 28.44; MS  $[M+Na]^+ = 278.19$ .

*tert*-butyl methyl(3-methylbenzyl)carbamate (**9k**)<sup>16</sup>

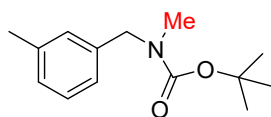

Colorless oil. 64% yield (75 mg). <sup>1</sup>H NMR (400 MHz, Chloroform-*d*)  $\delta$  7.22 (t,  $J = 7.5$  Hz, 1H), 7.08 – 7.00 (m, 3H), 4.39 (s, 2H), 2.82 (s, 3H), 2.34 (s, 3H), 1.48 (s, 9H); <sup>13</sup>C NMR (101 MHz, Chloroform-*d*)  $\delta$  156.24, 138.26, 138.16, 128.53, 128.04, 124.89, 124.51, 79.74, (52.69 and 52.10), 34.02, 28.61, 21.54; MS  $[M+Na]^+ = 258.21$ .

*tert*-butyl (3-chlorobenzyl)(methyl)carbamate (**9l**)<sup>16</sup>

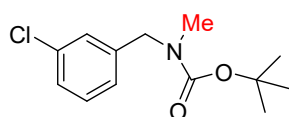

Colorless oil. 70% yield (89 mg). <sup>1</sup>H NMR (400 MHz, Chloroform-*d*)  $\delta$  7.27 – 7.21 (m, 3H), 7.09 (d,  $J = 6.5$  Hz, 1H), 4.38 (s, 2H), 2.83 (s, 3H), 1.47 (s, 9H); <sup>13</sup>C NMR (101 MHz, Chloroform-*d*)  $\delta$  155.80, 140.42, 134.57, 129.94, 127.73, 127.51, 125.49, 80.08, (52.34 and 51.68) 34.24, 28.53; MS  $[M+Na]^+ = 278.57$ .

*tert*-butyl methyl(2-methylbenzyl)carbamate (**9m**)<sup>9</sup>

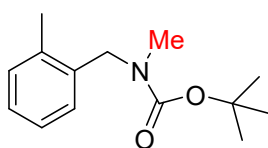

Colorless oil. 53% yield (62 mg). <sup>1</sup>H NMR (400 MHz, Chloroform-*d*)  $\delta$  7.19 – 7.15 (m, 3H), 7.12 – 7.09 (m, 1H), 4.44 (s, 2H), 2.79 (s, 3H), 2.28 (s, 3H), 1.47 (s, 9H); <sup>13</sup>C NMR (101 MHz, Chloroform-*d*)  $\delta$  155.77, 136.27, 135.83, 129.26, 128.84, 79.35, 51.10, 34.24, 28.52, 21.12; MS  $[M+Na]^+ = 258.21$ .

*tert*-butyl methyl(phenethyl)carbamate (**9n**)<sup>15</sup>

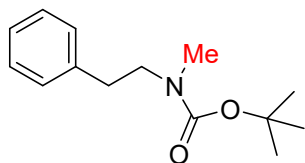

Colorless oil. 52% yield (61 mg). <sup>1</sup>H NMR (400 MHz, Chloroform-*d*)  $\delta$  7.29 (t,  $J = 7.3$  Hz, 2H), 7.22 – 7.19 (m, 3H), 3.42 (t,  $J = 7.2$  Hz, 2H), 2.83 – 2.78 (m, 5H), 1.40 (s, 9H); <sup>13</sup>C NMR (101 MHz, Chloroform-*d*)  $\delta$  155.73, 139.41, 128.98, 128.57, 126.34, 79.36, 50.99, 34.65, 34.36, 28.52; MS  $[M+Na]^+ = 258.29$ .

*tert*-butyl methyl(4-methylphenethyl)carbamate (**9o**)<sup>17</sup>

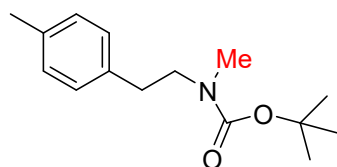

Colorless oil. 58% yield (72 mg).  $^1\text{H}$  NMR (400 MHz, Chloroform-*d*)  $\delta$  7.09 (s, 4H), 3.39 (t,  $J = 7.3$  Hz, 2H), 2.82 (s, 3H), 2.75 (t,  $J = 6.9$  Hz, 2H), 2.31 (s, 3H), 1.42 (s, 9H);  $^{13}\text{C}$  NMR (101 MHz, Chloroform-*d*)  $\delta$  155.70, 136.21, 135.76, 129.21, 128.80, 79.27, (51.05 and 50.71), 34.21, 28.46, 21.08; MS  $[\text{M}+\text{Na}]^+ = 272.32$ .

*tert*-butyl (4-methoxyphenethyl)(methyl)carbamate (**9p**)

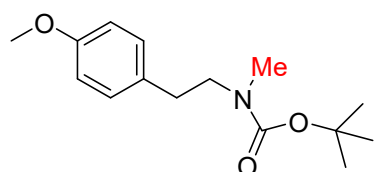

Colorless oil. 67% yield (89 mg).  $^1\text{H}$  NMR (400 MHz, Chloroform-*d*)  $\delta$  7.09 (s, 2H), 6.83 (d,  $J = 7.9$  Hz, 2H), 3.78 (s, 3H), 3.38 (t,  $J = 7.4$  Hz, 2H), 2.81 (s, 3H), 2.74 (t,  $J = 8.1$  Hz, 2H), 1.41 (s, 9H);  $^{13}\text{C}$  NMR (101 MHz, Chloroform-*d*)  $\delta$  158.25, 155.76, 131.45, 129.89, 114.03, 79.33, 55.39, (51.22 and 50.71), 34.53, 33.82, 28.53; MS  $[\text{M}+\text{Na}]^+ = 288.32$ .

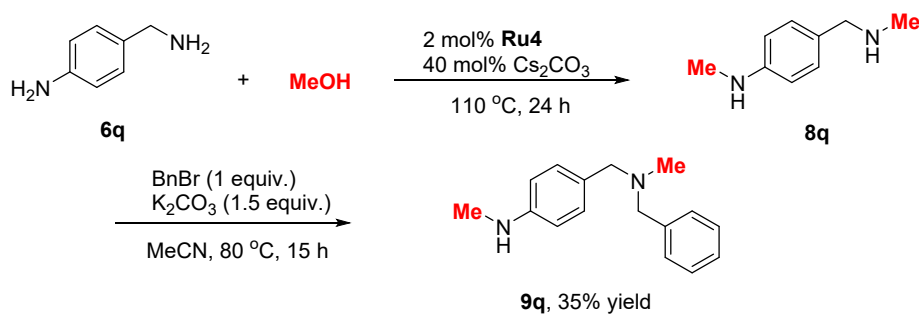

**Scheme S5** *N*-methylation of 4-aminobenzylamine (**6q**) with methanol

4-((benzyl(methyl)amino)methyl)-*N*-methylaniline (**9q**)<sup>18</sup>

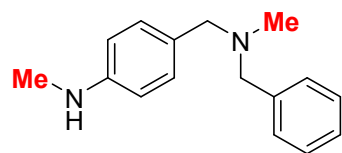

Following the general method for the *N*-mono-methylation of aliphatic with methanol, the crude reaction mixture **8q** was obtained. After cooled to rt, the crude reaction mixture was diluted with 10 mL of EtOAc. The reaction mixture was filtered and dried under vacuum. BnBr (0.5 mmol),  $\text{K}_2\text{CO}_3$  (0.70 mmol), and MeCN (5 mL) were sequentially added, and the reaction mixture was stirred at 80 °C for 15 h. After cooled to rt, the reaction mixture was filtered and dried under vacuum. The product was purified by column chromatography ( $\text{SiO}_2$ , 300-400 mesh, *n*-hexane:ethyl acetate =

10:1). Colorless oil. 35% yield (42 mg). <sup>1</sup>H NMR (400 MHz, Chloroform-*d*) δ 7.37 – 7.30 (m, 4H), 7.26 – 7.22 (m, 1H), 7.19 – 7.16 (m, 2H), 6.61 – 6.57 (m, 2H), 3.50 (s, 2H), 3.44 (s, 2H), 2.84 (s, 3H), 2.17 (s, 3H); <sup>13</sup>C NMR (101 MHz, Chloroform-*d*) δ 148.55, 139.55, 130.23, 129.16, 128.29, 127.73, 126.96, 112.38, 61.64, 61.59, 42.12, 31.03; MS [M+H]<sup>+</sup> = 241.14.

## 3.2. Scope of the aromatic amines.

### 3.2.1 Condition optimization

**Table S4.** Optimization of the *N*-methylation of aromatic amines with methanol.<sup>a</sup>

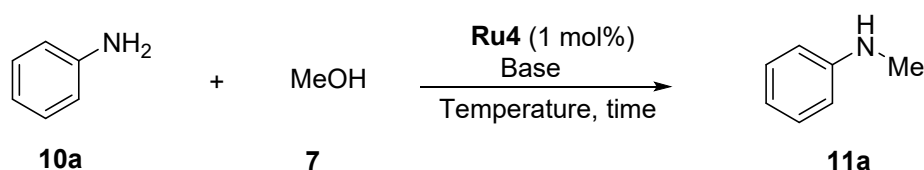

| Entry | Base (mol%)                               | Temperature (°C) | Time (h) | GC Yield (%) |
|-------|-------------------------------------------|------------------|----------|--------------|
| 1     | CS <sub>2</sub> CO <sub>3</sub> (20 mol%) | 110              | 12       | 89           |
| 2     | K <sub>2</sub> CO <sub>3</sub> (20 mol%)  | 110              | 12       | 84           |
| 3     | K <sub>2</sub> CO <sub>3</sub> (20 mol%)  | 120              | 12       | 96           |
| 4     | K <sub>2</sub> CO <sub>3</sub> (10 mol%)  | 120              | 12       | 91           |
| 5     | K <sub>2</sub> CO <sub>3</sub> (5 mol%)   | 120              | 24       | 84           |
| 6     | K <sub>2</sub> CO <sub>3</sub> (10 mol%)  | 120              | 24       | 96           |

<sup>a</sup> 0.5 mmol aniline, 0.5 mL MeOH, **Ru4** (1 mol%), Base (x mol%), GC yields.

Firstly, the *N*-methylation of aniline (**5a**) with methanol was performed at 110 °C for 12 h with 1 mol% of **Ru4** and 20 mol% of Cs<sub>2</sub>CO<sub>3</sub> (entry 2). The desired product **6a** was obtained in 89% yield. When the K<sub>2</sub>CO<sub>3</sub> was used as a base, the yield of **6a** was almost kept (entry 2). Additionally, the reaction conditions were optimized further with K<sub>2</sub>CO<sub>3</sub> (entries 3-6). To our delight, the yield of **6a** reached up to 96% in the presence of 10 mol% of K<sub>2</sub>CO<sub>3</sub> at 120 °C for 24 h (entry 6).

### General method for the substrate screening.

To a 15 mL seal tube in a glovebox, was added **Ru4** (1 mol%), K<sub>2</sub>CO<sub>3</sub> (10 mol%), aromatic amines (0.5 mmol), and methanol (0.5 mL) in sequence. Then the tube was closed with a screw-top cap and removed from the glovebox. The reaction mixture was stirred at 120 °C for 24 h. After cooled to rt, the crude reaction mixture was diluted

with 10 mL of EtOAc. The reaction mixture was filtered and dried under vacuum. The product was purified by column chromatography (SiO<sub>2</sub>, petroleum ether: ethyl acetate = 80: 1).

4-methoxy-N-methylaniline (**11b**)<sup>19</sup>

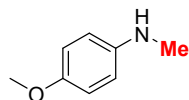

Yellow oil. 88% yield (60 mg). <sup>1</sup>H NMR (400 MHz, Chloroform-*d*) δ 6.83 – 6.79 (m, 2H), 6.62 – 6.58 (m, 2H), 3.76 (s, 3H), 3.09 (s, 1H), 2.81 (s, 3H); <sup>13</sup>C NMR (101 MHz, Chloroform-*d*) δ 152.29, 143.78, 115.07, 113.83, 55.99, 31.76; MS [M+H]<sup>+</sup> = 138.23.

4-(tert-butyl)-N-methylaniline (**11c**)<sup>19</sup>

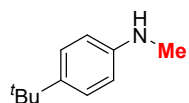

Yellow oil. 82% yield (67 mg). <sup>1</sup>H NMR (400 MHz, Chloroform-*d*) δ 7.28 – 7.25 (m, 2H), 6.64 – 6.60 (m, 2H), 2.86 (s, 3H), 1.33 (s, 9H); <sup>13</sup>C NMR (101 MHz, Chloroform-*d*) δ 147.10, 140.24, 126.09, 112.39, 33.96, 31.69, 31.12; MS [M+H]<sup>+</sup> = 164.17.

N-methyl-4-(methylthio)aniline (**11d**)<sup>20</sup>

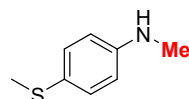

Yellow oil. 84% yield (64 mg). <sup>1</sup>H NMR (400 MHz, Chloroform-*d*) δ 7.25 – 7.22 (m, 2H), 6.57 – 6.54 (m, 2H), 3.73 (s, 1H), 2.82 (s, 3H), 2.41 (s, 3H); <sup>13</sup>C NMR (101 MHz, Chloroform-*d*) δ 148.37, 131.76; 124.15, 113.12, 30.84, 19.43; MS [M+H]<sup>+</sup> = 154.18.

4-fluoro-N-methylaniline (**11e**)<sup>21</sup>

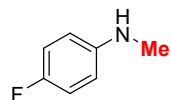

Yellow oil. 86% yield (54 mg). <sup>1</sup>H NMR (400 MHz, Chloroform-*d*) δ 6.95 – 6.91 (m, 2H), 6.59 – 6.56 (m, 2H), 3.14 (s, 1H), 2.81 (s, 3H); <sup>13</sup>C NMR (101 MHz, Chloroform-*d*) δ 155.99 (d, *J* = 233.1 Hz), 145.77 (d, *J* = 2.0 Hz), 115.73 (d, *J* = 22.2 Hz), 113.33 (d, *J* = 8.0 Hz), 31.49; <sup>19</sup>F NMR (377 MHz, Chloroform-*d*) δ -128.41; MS [M+H]<sup>+</sup> = 126.09

4-chloro-N-methylaniline (**11f**)<sup>19</sup>

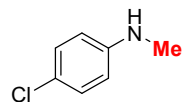

Yellow oil. 86% yield (61 mg). <sup>1</sup>H NMR (400 MHz, Chloroform-*d*) δ 7.14 – 7.12 (m, 2H), 6.56 – 6.51 (m, 2H), 2.81 (s, 3H); <sup>13</sup>C NMR (101 MHz, Chloroform-*d*) δ 147.96, 129.12, 121.95, 113.59, 30.94; MS [M+H]<sup>+</sup> = 142.09.

N-methyl-4-nitroaniline (**11g**)<sup>22</sup>

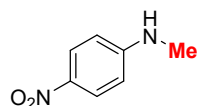

Yellow solid. 55% yield (42 mg).  $^1\text{H}$  NMR (400 MHz, Chloroform-*d*)  $\delta$  8.08 (d,  $J = 9.1$  Hz, 2H), 6.52 (d,  $J = 9.1$  Hz, 2H), 4.67 (brs, 1H), 2.93 (d,  $J = 5.1$  Hz, 3H);  $^{13}\text{C}$  NMR (101 MHz, Chloroform-*d*)  $\delta$  154.26, 137.91, 126.42, 110.72, 30.15; MS  $[\text{M}+\text{H}]^+ = 153.26$ .

#### 1-(4-(methylamino)phenyl)ethan-1-one (**11h**)<sup>22</sup>

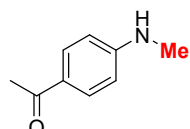

Yellow oil. 46% yield (35 mg).  $^1\text{H}$  NMR (400 MHz, Chloroform-*d*)  $\delta$  7.84 – 7.81 (m, 2H), 6.57 – 6.53 (m, 2H), 4.31 (s, 1H), 2.88 (s, 3H), 2.49 (s, 3H);  $^{13}\text{C}$  NMR (101 MHz, Chloroform-*d*)  $\delta$  196.52, 153.25, 130.87, 126.69, 111.15, 30.18, 26.06; MS  $[\text{M}+\text{H}]^+ = 150.14$ .

#### 3-bromo-N-methylaniline (**11i**)<sup>23</sup>

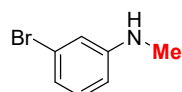

Yellow oil. 84% yield (78 mg).  $^1\text{H}$  NMR (400 MHz, Chloroform-*d*)  $\delta$  7.02 (t,  $J = 8.0$  Hz, 1H), 6.82 – 6.80 (m, 1H), 6.73 (t,  $J = 1.8$  Hz, 1H), 6.51 (dd,  $J = 8.2, 2.2$  Hz, 1H), 3.77 (s, 1H), 2.81 (s, 3H);  $^{13}\text{C}$  NMR (101 MHz, Chloroform-*d*)  $\delta$  150.69, 130.53, 123.44, 120.05, 114.92, 111.37, 30.64; MS  $[\text{M}+\text{H}]^+ = 186.24$ .

#### N-methyl-3-(trifluoromethyl)aniline (**11j**)<sup>23</sup>

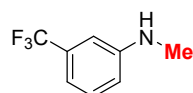

Yellow oil. 83% yield (73 mg).  $^1\text{H}$  NMR (400 MHz, Chloroform-*d*)  $\delta$  7.29 (t,  $J = 7.9$  Hz, 1H), 6.96 (d,  $J = 7.6$  Hz, 1H), 6.82 (s, 1H), 6.77 (d,  $J = 8.2$  Hz, 1H), 3.42 (s, 1H), 2.90 (s, 3H);  $^{13}\text{C}$  NMR (101 MHz, Chloroform-*d*)  $\delta$  149.55, 131.71 (q,  $J = 32.3$  Hz), 129.67, 124.58 (q,  $J = 272.7$  Hz), 115.64, 113.69 (q,  $J = 4.0$  Hz), 108.53 (q,  $J = 3.0$  Hz), 30.59;  $^{19}\text{F}$  NMR (377 MHz, Chloroform-*d*)  $\delta$  -62.87; MS  $[\text{M}+\text{H}]^+ = 176.20$ .

#### 3-ethyl-N-methylaniline (**11k**)<sup>24</sup>

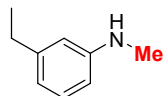

Yellow oil. 61% yield (41 mg).  $^1\text{H}$  NMR (400 MHz, Chloroform-*d*)  $\delta$  7.14 (t,  $J = 7.7$  Hz, 1H), 6.61 (d,  $J = 7.5$  Hz, 1H), 6.50 – 6.47 (m, 2H), 3.31 (s, 1H), 2.86 (s, 3H), 2.62 (q,  $J = 7.6$  Hz, 2H), 1.26 (t,  $J = 7.6$  Hz, 3H);  $^{13}\text{C}$  NMR (101 MHz, Chloroform-*d*)  $\delta$

149.55, 145.54, 129.27, 117.19, 112.27, 109.99, 30.94, 29.18, 15.67; MS [M+H]<sup>+</sup> = 136.21.

a) *N*-methylation of 2-ethylaniline with methanol

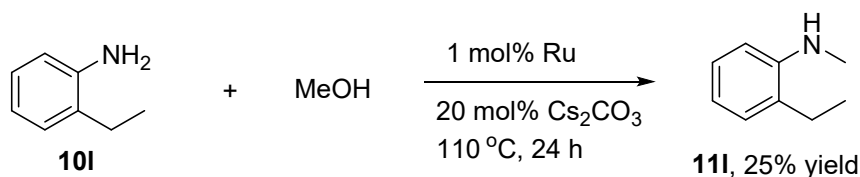

b) *N*-methylation of 2,6-dimethylaniline with methanol

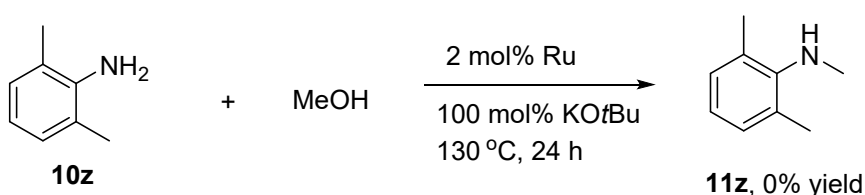

**Scheme S6.** *N*-methylation of 2-ethylaniline and 2,6-dimethylaniline with methanol.

In this catalytic system, the steric hindrance of the substrate has a significant impact on the reaction activity. For example, when 2-ethylaniline (**10I**) was used as the substrate, the product **11I** was obtained in only 25% NMR yield (Scheme S6a). Attempts at the *N*-methylation of 2,6-dimethylaniline (**10z**) were unsuccessful even at a higher catalyst loading (2 mol%) and a higher temperature of 130 °C (Scheme S6b). These results indicated the methylation reaction between **Ru4** and methanol is relatively difficult.

2-ethyl-*N*-methylaniline (**11I**)<sup>23</sup>

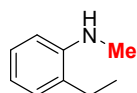

Yellow oil. 73% yield (49 mg). <sup>1</sup>H NMR (400 MHz, Chloroform-*d*) δ 7.20 (td, *J* = 7.7, 1.6 Hz, 1H), 7.11 (d, *J* = 7.3 Hz, 1H), 6.75 (td, *J* = 7.4, 1.2 Hz, 1H), 6.67 (d, *J* = 8.0 Hz, 1H), 2.92 (s, 3H), 2.51 (q, *J* = 7.5 Hz, 2H), 1.28 (t, *J* = 7.5 Hz, 3H); <sup>13</sup>C NMR (101 MHz, Chloroform-*d*) δ 146.75, 127.80, 127.74, 127.16, 117.22, 109.68, 31.00, 23.85, 12.97; MS [M+H]<sup>+</sup> = 136.09.

2-(*tert*-butyl)-*N*-methylaniline (**11m**)<sup>25</sup>

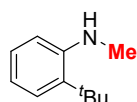

Yellow oil. 37% yield (30 mg). <sup>1</sup>H NMR (400 MHz, Chloroform-*d*) δ 7.26 (dd, *J* = 7.7, 1.6 Hz, 1H), 7.20 – 7.15 (m, 1H), 6.74 – 6.68 (m, 2H), 2.93 (s, 3H), 1.43 (s, 9H); <sup>13</sup>C NMR (101 MHz, Chloroform-*d*) δ 147.55, 133.38, 127.34, 126.18, 117.04, 111.38, 34.26, 31.38, 30.02; MS [M+H]<sup>+</sup> = 164.36.

(2-(methylamino)phenyl)methanol (**11n**)<sup>26</sup>

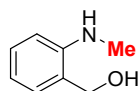

Yellow oil. 51% yield (35 mg).  $^1\text{H}$  NMR (400 MHz, Chloroform-*d*)  $\delta$  7.32 – 7.25 (m, 1H), 7.08 (dd,  $J = 7.7, 1.5$  Hz, 1H), 6.73 – 6.69 (m, 2H), 4.65 (s, 2H), 2.90 (s, 3H);  $^{13}\text{C}$  NMR (151 MHz, Chloroform-*d*)  $\delta$  148.69, 129.82, 129.07, 124.43, 116.47, 110.20, 64.85, 30.42; MS  $[\text{M}+\text{H}]^+ = 138.45$ .

N-methylnaphthalen-2-amine (**11o**)<sup>19</sup>

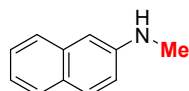

Yellow oil. 82% yield (64 mg).  $^1\text{H}$  NMR (400 MHz, Chloroform-*d*)  $\delta$  7.70 – 7.62 (m, 3H), 7.38 (t,  $J = 7.5$  Hz, 1H), 7.21 (t,  $J = 7.5$  Hz, 1H), 6.89 (dd,  $J = 8.8, 2.3$  Hz, 1H), 6.81 (d,  $J = 2.1$  Hz, 1H), 3.88 (brs, 1H), 2.95 (s, 3H);  $^{13}\text{C}$  NMR (101 MHz, Chloroform-*d*)  $\delta$  147.12, 135.42, 128.94, 127.77, 127.62, 126.43, 126.07, 122.03, 118.01, 103.91, 30.89; MS  $[\text{M}+\text{H}]^+ = 158.06$ .

N-methylnaphthalen-1-amine (**11p**)<sup>19</sup>

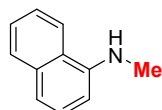

Yellow oil. 78% yield (61 mg).  $^1\text{H}$  NMR (400 MHz, Chloroform-*d*)  $\delta$  7.81 – 7.75 (m, 2H), 7.46 – 7.39 (m, 2H), 7.40 – 7.35 (m, 1H), 7.25 – 7.23 (m, 1H), 6.60 (d,  $J = 7.6$  Hz, 1H), 4.42 (brs, 1H), 3.01 (s, 3H);  $^{13}\text{C}$  NMR (101 MHz, Chloroform-*d*)  $\delta$  144.65, 134.35, 128.79, 126.80, 125.83, 124.82, 123.58, 119.91, 117.45, 103.92, 31.16; MS  $[\text{M}+\text{H}]^+ = 158.11$ .

N-methylpyridin-2-amine (**11q**)<sup>27</sup>

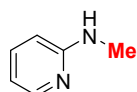

Yellow oil. 56% yield (30 mg).  $^1\text{H}$  NMR (400 MHz, Chloroform-*d*)  $\delta$  8.07 (d,  $J = 4.7$  Hz, 1H), 7.44 – 7.40 (m, 1H), 6.57 – 6.54 (m, 1H), 6.38 (d,  $J = 8.4$  Hz, 1H), 4.60 (s, 1H), 2.90 (s, 3H);  $^{13}\text{C}$  NMR (101 MHz, Chloroform-*d*)  $\delta$  159.68, 148.10, 137.62, 112.81, 106.30, 29.19; MS  $[\text{M}+\text{H}]^+ = 109.13$ .

N-methylpyridin-3-amine (**11r**)<sup>19</sup>

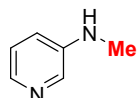

Yellow oil. 71% yield (38 mg).  $^1\text{H}$  NMR (400 MHz, Chloroform-*d*)  $\delta$  8.01 (s, 1H), 7.93 (d,  $J = 4.7$  Hz, 1H), 7.08 (dd,  $J = 8.3, 4.6$  Hz, 1H), 6.85 (ddd,  $J = 8.4, 3.0, 1.4$  Hz, 1H), 2.83 (s, 3H);  $^{13}\text{C}$  NMR (101 MHz, Chloroform-*d*)  $\delta$  145.36, 138.52, 135.73, 123.84,

118.21, 30.36; MS [M+H]<sup>+</sup> = 109.11.

N-methylpyrazin-2-amine (**11s**)<sup>27</sup>

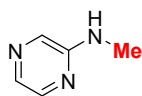

Yellow oil. 58% yield (31 mg). <sup>1</sup>H NMR (400 MHz, Chloroform-*d*) δ 7.96 (dd, *J* = 2.7, 1.5 Hz, 1H), 7.87 (s, 1H), 7.76 (d, *J* = 2.8 Hz, 1H), 4.81 (brs, 1H), 2.95 (s, 3H); <sup>13</sup>C NMR (101 MHz, Chloroform-*d*) δ 155.52, 142.11, 132.84, 131.99, 28.55; MS [M+H]<sup>+</sup> = 110.28.

(*E*)-N-methyl-4-styrylaniline (**11t**)<sup>19</sup>

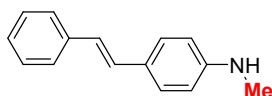

White solid. 90% yield (94 mg). <sup>1</sup>H NMR (400 MHz, Chloroform-*d*) δ 7.48 (d, *J* = 7.6 Hz, 2H), 7.39 (d, *J* = 8.5 Hz, 2H), 7.34 (t, *J* = 7.6 Hz, 2H), 7.21 (t, *J* = 7.3 Hz, 1H), 7.05 (d, *J* = 16.3 Hz, 1H), 6.92 (d, *J* = 16.3 Hz, 1H), 6.61 (d, *J* = 8.5 Hz, 2H), 3.81 (brs, 1H), 2.87 (s, 3H); <sup>13</sup>C NMR (101 MHz, Chloroform-*d*) δ 149.16, 138.28, 129.03, 128.71, 127.87, 126.84, 126.16, 124.55, 112.59, 30.79; MS [M+H]<sup>+</sup> = 210.29.

N, 4-dimethylbenzenesulfonamide (**11x**)<sup>28</sup>

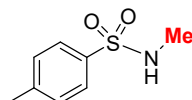

White solid. 70% yield (65 mg). <sup>1</sup>H NMR (400 MHz, Chloroform-*d*) δ 7.74 (d, *J* = 8.2 Hz, 2H), 7.32 (d, *J* = 8.0 Hz, 2H), 4.50 – 4.49 (m, 1H), 2.64 (d, *J* = 5.4 Hz, 3H), 2.43 (s, 3H); <sup>13</sup>C NMR (101 MHz, Chloroform-*d*) δ 143.66, 135.94, 129.86, 127.41, 29.45, 21.65; MS (ESI) [M+H]<sup>+</sup> = 186.23.

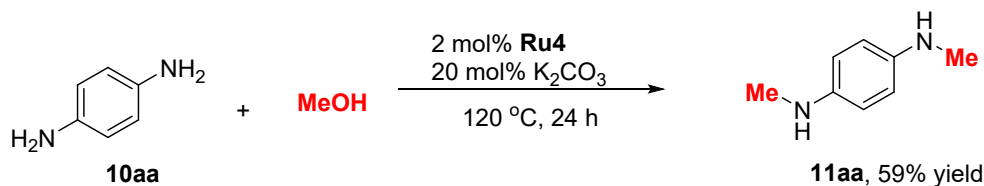

**Scheme S7.** *N*-methylation of *p*-phenylenediamine (**10aa**) with methanol.

*N*<sub>1</sub>,*N*<sub>4</sub>-dimethylbenzene-1,4-diamine (**11aa**)<sup>29</sup>

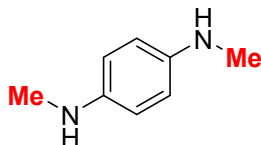

The compound was prepared as described in the general method for the *N*-mono-methylation of anilines with methanol, which was purified by column chromatography over silica-gel (300-400 mesh) with *n*-hexane:ethyl acetate = 4:1. Brown solid. 59%



---

yield (40 mg).  $^1\text{H}$  NMR (400 MHz, Methylene Chloride- $d_2$ )  $\delta$  6.54 (s, 4H), 2.76 (s, 6H);  $^{13}\text{C}$  NMR (101 MHz, Methylene Chloride- $d_2$ )  $\delta$  142.55, 114.55, 32.03; MS  $[\text{M}+\text{H}]^+ = 137.27$ .

## V. Mechanism studies

### 1. Hg poisoning experiments.

To a 15 mL reaction tube in a glovebox, was added **Ru4** (1 mol%), Cs<sub>2</sub>CO<sub>3</sub> (20 mol%), Hg (100 mol%), cyclohexylamine (**6a**, 0.5 mmol), and methanol (0.5 mL) in sequence. Then the tube was closed with a screw-top cap and removed from the glovebox. The reaction mixture was stirred at 110 °C for 9 h. After cooled to rt, 1 equiv. of internal standard (mesitylene) was added to the reaction mixture. Then, the reaction mixture was diluted with 10 mL of CH<sub>2</sub>Cl<sub>2</sub>, filtered through syringe filter and collected in GC vials for analysis.

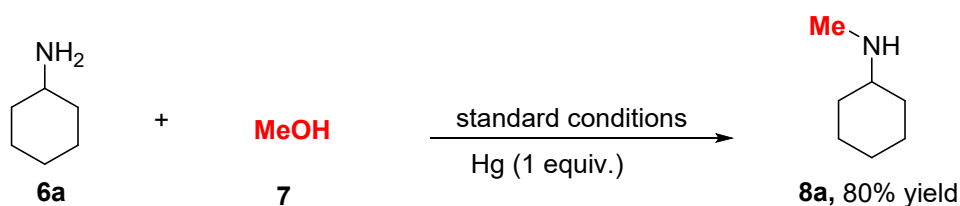

**Scheme S8.** The Hg poisoning experiments.

### 2. Deuteration and kinetic isotopic effect experiments

#### Parallel reactions

To a 15 mL reaction tube in a glovebox, was added **Ru4** (1 mol%), Cs<sub>2</sub>CO<sub>3</sub> (20 mol%), cyclohexylamine (**6a**, 0.5 mmol), and methanol (0.5 mL) or CD<sub>3</sub>OD (0.5 mL) in sequence. Then the tube was closed with a screw-top cap and removed from the glovebox. The reaction mixture was stirred at 110 °C for 4 h. After cooled to rt, 1 equiv. of internal standard (mesitylene) was added to the reaction mixture. Then, the reaction mixture was diluted with 10 mL of CH<sub>2</sub>Cl<sub>2</sub>, filtered through syringe filter and collected in GC vials for analysis. When CH<sub>3</sub>OH was used as the starting material, the yield of **8a** is 36 ± 2%, and CD<sub>3</sub>OD produced the product **8a-d** in 27 ± 4% (Table S5).

**Table S5.** The yields of **8a** and **8a-d** in the parallel reactions.

| Entry                    | 1  | 2  | 3  | Average ± SD |
|--------------------------|----|----|----|--------------|
| Product                  |    |    |    |              |
| Yield of <b>8a</b> (%)   | 38 | 34 | 37 | 36 ± 2       |
| Yield of <b>8a-d</b> (%) | 30 | 23 | 27 | 27 ± 4       |

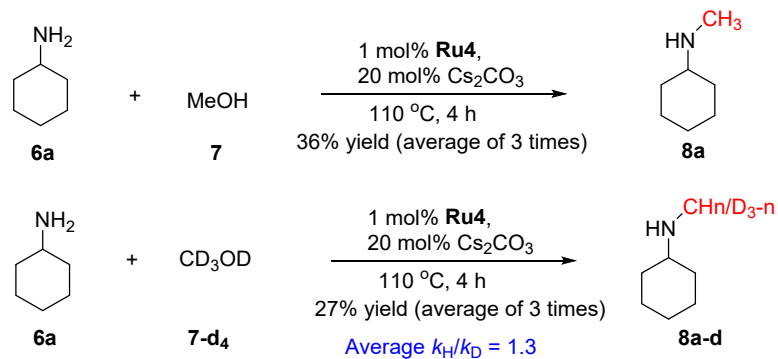

**Scheme S9.** The parallel reactions.

**The deuterium experiments**

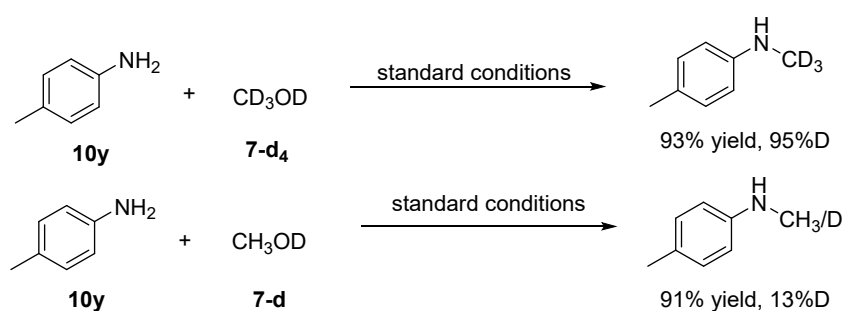

**Scheme S10.** The deuterium experiment using 4-methylaniline and CD<sub>3</sub>OD or CH<sub>3</sub>OD.

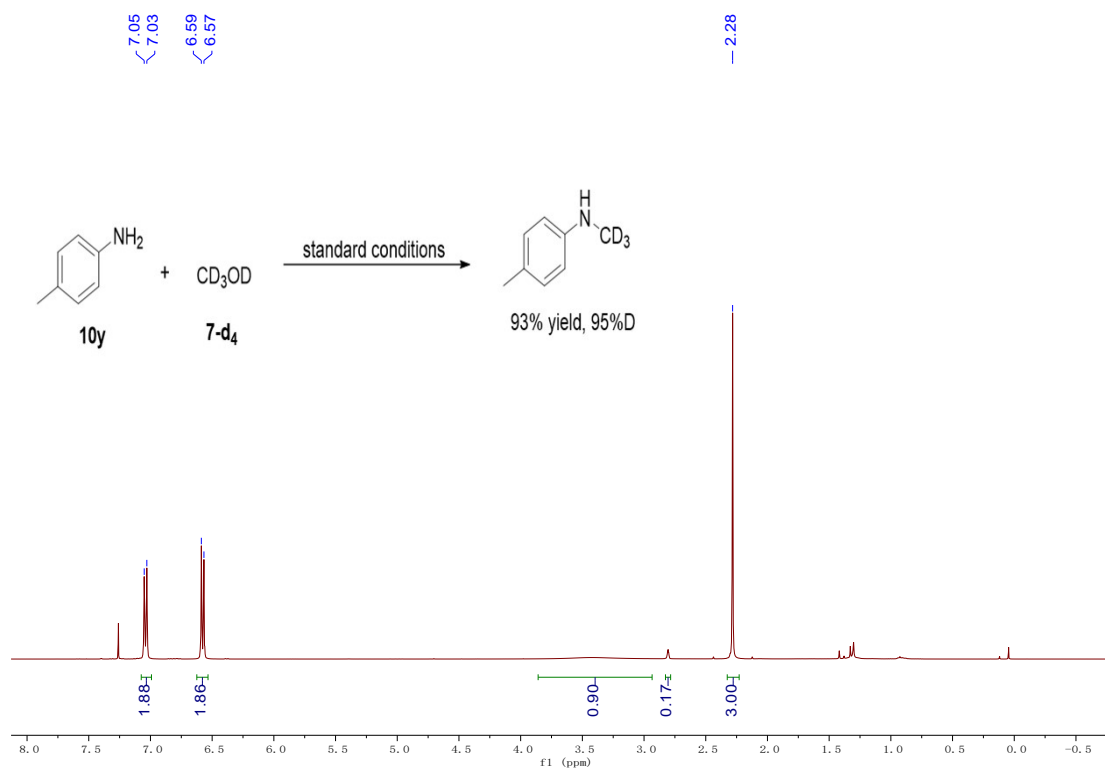

**Figure S3.**  $^1\text{H}$  NMR (400 MHz,  $\text{CDCl}_3$ ) spectrum of the product of the reaction of 4-methylaniline with  $\text{CD}_3\text{OD}$ .

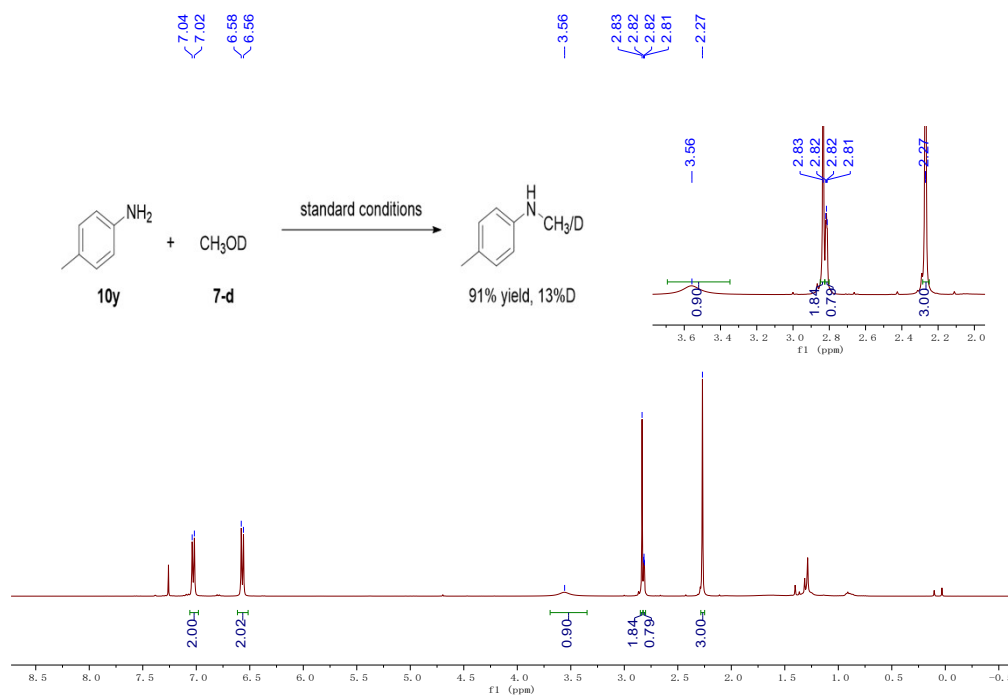

**Figure S4.**  $^1\text{H}$  NMR (400 MHz,  $\text{CDCl}_3$ ) spectrum of the product of the reaction of 4-methylaniline with  $\text{CH}_3\text{OD}$ .

### 3. The studies of the observation of the [RuH] species.

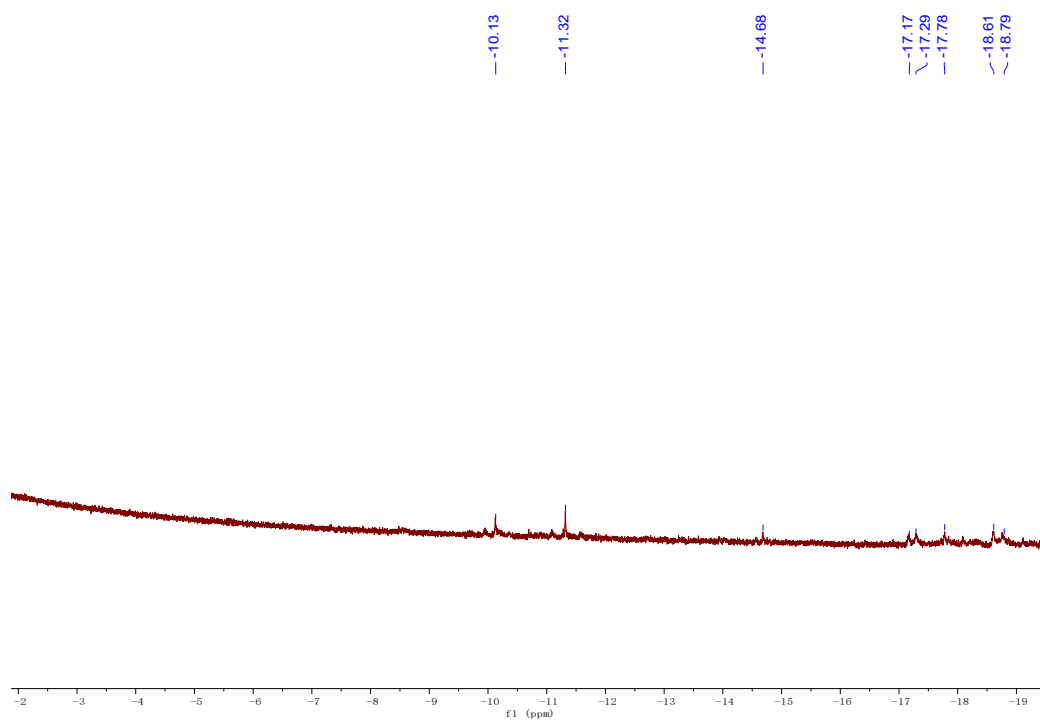

**Figure S5.**  $^1\text{H}$  NMR (400 MHz,  $\text{CD}_2\text{Cl}_2$ ) spectrum of reaction mixtures at 2 h of hydride region (-2 - -19ppm)

## 4. Computational Section

All calculations were performed using the Gaussian 09 package.<sup>30</sup> Full geometry optimization followed by frequency calculations on the stationary points were carried out to ascertain the nature of the stationary points as minima or first order saddle point. Hybrid functional, M06-L was used with the LANL2DZ basis set<sup>31-33</sup> for Ru and 6-31G\*\* basis set<sup>34-36</sup> for non-metal elements. The transition states (TS) were further confirmed by performing intrinsic reaction coordinate (IRC) calculation using same method. The energy results were further refined by calculating the single-point energy at the M06-L/BSII level with a larger basis set (BSII designates SDD for Ru and 6-311++g (d, p) for nonmetal atoms). The solvation effect of MeOH was simulated using the SMD continuum solvent model.<sup>37</sup>

### Optimized XYZ coordinates of all species

|       |             |             |             |           |             |             |             |
|-------|-------------|-------------|-------------|-----------|-------------|-------------|-------------|
| MeOH  |             |             |             | H         | -2.83585800 | 0.93845000  | -0.21140800 |
| 0 1   |             |             |             | H         | -0.10387600 | -1.13150200 | 1.32176800  |
| C     | 0.65463100  | -0.01910000 | 0.00001700  | H         | -2.46500400 | -1.61608400 | 0.46423000  |
| H     | 1.07675700  | 0.98823900  | 0.00003600  | H         | -2.38326200 | 0.54070000  | 1.43327900  |
| H     | 1.03915300  | -0.54028900 | -0.89026400 | H         | -0.17743400 | 1.32524000  | 1.19088300  |
| H     | 1.03911700  | -0.54030900 | 0.89030300  | H         | -0.51934100 | 0.82717600  | -1.79854600 |
| O     | -0.74497400 | 0.12109300  | -0.00000900 | H         | 0.77777800  | -1.05174100 | -1.55823100 |
| H     | -1.12302100 | -0.76178400 | -0.00010700 | <b>8a</b> |             |             |             |
| HCHO  |             |             |             | 0 1       |             |             |             |
| 0 1   |             |             |             | C         | 2.29272800  | 0.41585800  | 0.82343000  |
| C     | 0.00000000  | 0.00000000  | -0.52616900 | H         | 3.35842600  | 0.35296400  | 1.06069100  |
| H     | 0.00000000  | 0.93801500  | -1.12847800 | H         | 2.05675100  | 1.47765500  | 0.62469300  |
| H     | 0.00000000  | -0.93801500 | -1.12847800 | N         | 1.98719100  | -0.50364600 | -0.25606600 |
| O     | 0.00000000  | 0.00000000  | 0.67674600  | C         | 0.58716400  | -0.51547600 | -0.69270500 |
| Imine |             |             |             | C         | -0.27295800 | -1.29429700 | 0.30934400  |
| 0 1   |             |             |             | C         | -0.04043400 | 0.87158500  | -0.98728200 |
| C     | 2.54894700  | 0.40057000  | 0.49681600  | C         | -1.75142100 | -1.01481100 | 0.07345500  |
| H     | 3.50951500  | 0.27214400  | 1.00243800  | H         | -0.03824000 | -2.36028100 | 0.23524800  |
| H     | 2.18032800  | 1.43644800  | 0.42394200  | C         | -0.89278300 | 1.37234500  | 0.17251900  |
| N     | 1.96031500  | -0.62686000 | 0.04819800  | H         | 0.75221500  | 1.58980200  | -1.23253500 |
| C     | 0.65790200  | -0.52223700 | -0.60234300 | C         | -2.09392100 | 0.44588500  | 0.40419200  |
| C     | -0.32616900 | -1.33386800 | 0.26521400  | H         | -1.98201200 | -1.22239100 | -0.98111200 |
| C     | 0.09533600  | 0.87927900  | -0.89105500 | H         | -1.22723000 | 2.40094300  | -0.00093500 |
| C     | -1.76477500 | -0.93660800 | -0.03225200 | H         | -2.94395400 | 0.77280600  | -0.20646700 |
| H     | -0.15178300 | -2.40369300 | 0.11977900  | H         | -0.00901200 | -0.99963000 | 1.33472000  |
| C     | -0.76372000 | 1.37909100  | 0.26325300  | H         | -2.37984100 | -1.69751500 | 0.65439200  |
| H     | 0.90496000  | 1.57772800  | -1.13033100 | H         | -2.42320300 | 0.52702100  | 1.44684500  |
| C     | -2.02751100 | 0.51549400  | 0.39670900  | H         | -0.27499400 | 1.40868900  | 1.07929400  |
| H     | -1.95048500 | -1.05128600 | -1.10900000 | H         | -0.66942900 | 0.80404900  | -1.88508700 |
| H     | -1.02779500 | 2.43412000  | 0.13576500  | H         | 0.58783300  | -1.08582600 | -1.63175400 |

|            |             |             |             |            |             |             |             |
|------------|-------------|-------------|-------------|------------|-------------|-------------|-------------|
| H          | 2.56526100  | -0.25899700 | -1.05212100 | H          | 4.33757700  | 3.88435500  | -0.48397500 |
| H          | 1.74684300  | 0.12969500  | 1.72887700  | C          | -4.41515900 | 2.05627700  | -1.30646300 |
| <b>IM0</b> |             |             |             | H          | -5.06353700 | 1.17705200  | -1.35014600 |
| I I        |             |             |             | H          | -4.67201700 | 2.70644400  | -2.14637800 |
| Ru         | -0.66685100 | -0.11411200 | 0.37329300  | H          | -4.64748000 | 2.59808800  | -0.38357100 |
| N          | 0.73928500  | 1.28076600  | 0.51408400  | C          | -1.56175400 | -2.14619600 | 2.89661500  |
| H          | 0.33687200  | 2.19605200  | 0.70745600  | H          | -1.09483200 | -3.03801600 | 2.47247300  |
| N          | 1.91713000  | -1.68064000 | -0.11477800 | H          | -2.43668100 | -2.47228200 | 3.46984800  |
| N          | 0.56602800  | -2.16053900 | -1.70694700 | H          | -0.86096700 | -1.69343700 | 3.60180400  |
| C          | 2.10075200  | 1.43793700  | 0.33308400  | C          | 4.86717000  | 1.85196400  | 0.00581600  |
| C          | -2.65581500 | -0.69580600 | -0.48272400 | H          | 5.93378100  | 2.00709700  | -0.11773700 |
| H          | -2.87043300 | -1.04760400 | -1.48697000 | <b>IM1</b> |             |             |             |
| C          | -2.62767700 | 0.71261600  | -0.24274600 | I I        |             |             |             |
| C          | -2.38046600 | 1.15292400  | 1.09221200  | Ru         | 0.63300800  | -0.23385700 | -0.09927500 |
| H          | -2.34083700 | 2.21545200  | 1.31346400  | N          | -0.70555300 | 1.36224800  | 0.30180600  |
| C          | 0.67177900  | -1.39777900 | -0.57993000 | H          | -0.24157500 | 0.67005500  | 1.95744200  |
| C          | 3.01706000  | 0.38098000  | 0.55907000  | N          | -2.16120900 | -1.46079900 | -0.21775900 |
| C          | -2.02292800 | 0.22614600  | 2.08994400  | N          | -0.96153400 | -2.56673200 | 1.18112800  |
| H          | -1.70687900 | 0.58785000  | 3.06483100  | C          | -2.02929800 | 1.71617100  | 0.04273800  |
| C          | -1.96723400 | -1.18358300 | 1.83149000  | C          | 2.77106800  | -0.85675600 | -0.15088200 |
| C          | 2.51920600  | -0.95284200 | 1.00361000  | H          | 3.36523600  | -1.21270500 | 0.68899700  |
| H          | 3.32649300  | -1.56904400 | 1.40607100  | C          | 2.79561600  | 0.54903200  | -0.46552500 |
| H          | 1.74081200  | -0.85377800 | 1.77163300  | C          | 1.94945000  | 0.99320800  | -1.48961300 |
| C          | 1.71995700  | -2.88747900 | -1.92919700 | H          | 1.86067900  | 2.05592300  | -1.69512300 |
| H          | 1.82389300  | -3.55257900 | -2.77170700 | C          | -0.91945200 | -1.52020600 | 0.31400200  |
| C          | 2.61361000  | 2.70350900  | -0.02327200 | C          | -2.98217100 | 0.86244600  | -0.55947400 |
| H          | 1.91499900  | 3.52265300  | -0.18217300 | C          | 1.08431000  | 0.08421900  | -2.18217300 |
| C          | -2.93214200 | 1.67852800  | -1.35912200 | H          | 0.38794300  | 0.46524300  | -2.92336100 |
| H          | -2.74931800 | 1.13871500  | -2.29925900 | C          | 1.14468300  | -1.31806800 | -1.93598600 |
| C          | 2.57727800  | -2.57902400 | -0.92442800 | C          | -2.56930400 | -0.43096500 | -1.17976000 |
| H          | 3.58097600  | -2.91485800 | -0.71684500 | H          | -3.38300700 | -0.85185200 | -1.77629300 |
| C          | -2.34395900 | -1.62205800 | 0.53506300  | H          | -1.70821300 | -0.28461000 | -1.84107700 |
| H          | -2.27097300 | -2.67932700 | 0.29647500  | C          | -2.22302700 | -3.13620300 | 1.19557100  |
| C          | -2.04132300 | 2.91385400  | -1.34370200 | H          | -2.46061000 | -3.98299400 | 1.81931700  |
| H          | -2.22024300 | 3.53344400  | -0.45813000 | C          | -2.46657800 | 2.99946200  | 0.43473700  |
| H          | -2.24836100 | 3.54145100  | -2.21346100 | H          | -1.74188300 | 3.68077900  | 0.87701200  |
| H          | -0.98130100 | 2.63995800  | -1.36703800 | C          | 3.71116500  | 1.46313300  | 0.30989100  |
| C          | 4.38116200  | 0.60675800  | 0.38713400  | H          | 3.76346100  | 1.06235400  | 1.33280600  |
| H          | 5.07488200  | -0.21005600 | 0.57642900  | C          | -2.97982800 | -2.43584400 | 0.31461900  |
| C          | -0.57835000 | -2.19101000 | -2.59481400 | H          | -4.01172400 | -2.54276300 | 0.01958000  |
| H          | -1.37233500 | -2.82828100 | -2.19511000 | C          | 2.02836100  | -1.77995600 | -0.91024100 |
| H          | -0.26864000 | -2.58575000 | -3.56221700 | H          | 2.03923400  | -2.83448100 | -0.65002100 |
| H          | -0.95799600 | -1.17704800 | -2.73134000 | C          | 3.22381600  | 2.90241900  | 0.38331000  |
| C          | 3.97164600  | 2.90383200  | -0.19528200 | H          | 3.25954500  | 3.39351900  | -0.59465700 |

|            |             |             |             |            |             |             |             |
|------------|-------------|-------------|-------------|------------|-------------|-------------|-------------|
| H          | 3.85998200  | 3.48638900  | 1.05227800  | C          | -2.50670400 | 0.48178500  | 1.21762900  |
| H          | 2.19558400  | 2.97191800  | 0.75731500  | H          | -3.27396100 | 0.93473400  | 1.85108600  |
| C          | -4.31143200 | 1.27589300  | -0.67760400 | H          | -1.61926000 | 0.30648400  | 1.83481800  |
| H          | -5.02260200 | 0.59952800  | -1.14922400 | C          | -2.20289000 | 3.07524400  | -1.28173200 |
| C          | 0.12941100  | -3.01619300 | 2.02531400  | H          | -2.45182200 | 3.88904800  | -1.94394900 |
| H          | 0.24301600  | -4.09861100 | 1.93791800  | C          | -2.63581600 | -2.92397200 | -0.45845900 |
| H          | -0.06167000 | -2.75195100 | 3.06725600  | H          | -1.96576900 | -3.61870900 | -0.96088900 |
| H          | 1.04629500  | -2.52232200 | 1.70509200  | C          | 3.76891000  | -1.44309500 | -0.32962400 |
| C          | -3.78694600 | 3.39388100  | 0.30006100  | H          | 3.74941800  | -1.10719400 | -1.37654300 |
| H          | -4.08098000 | 4.38735500  | 0.62647700  | C          | -2.94215000 | 2.42798600  | -0.34673100 |
| C          | 5.11932400  | 1.38625000  | -0.28813000 | H          | -3.96671100 | 2.55613300  | -0.03495200 |
| H          | 5.50017600  | 0.36126800  | -0.30808600 | C          | 2.02093900  | 1.78680100  | 0.83413000  |
| H          | 5.81595600  | 1.99160500  | 0.29717100  | H          | 1.99875800  | 2.83323300  | 0.54359900  |
| H          | 5.12588300  | 1.76555700  | -1.31498500 | C          | 3.36844300  | -2.90962600 | -0.28648400 |
| C          | 0.29262300  | -2.27975700 | -2.69546900 | H          | 3.47432000  | -3.32931300 | 0.71940300  |
| H          | -0.08399200 | -3.08068100 | -2.05305400 | H          | 4.01092600  | -3.49889500 | -0.94435600 |
| H          | 0.87974400  | -2.74537700 | -3.49387900 | H          | 2.33259100  | -3.06474500 | -0.60948800 |
| H          | -0.55943400 | -1.78376500 | -3.16571600 | C          | -4.34002200 | -1.15516400 | 0.79971800  |
| C          | -4.73171100 | 2.52577400  | -0.24594000 | H          | -4.99791000 | -0.45917600 | 1.31733300  |
| H          | -5.76822300 | 2.82709200  | -0.35206400 | C          | 0.12885800  | 2.87748800  | -2.16887300 |
| H          | -0.15370900 | 2.21650300  | 0.25954200  | H          | 0.28048600  | 3.95840400  | -2.13507500 |
| O          | 0.43116900  | -0.01709900 | 2.20164700  | H          | -0.10992200 | 2.57143700  | -3.18914600 |
| C          | 1.45617400  | 0.57258700  | 2.99374700  | H          | 1.03779200  | 2.36264500  | -1.85921500 |
| H          | 1.85215000  | 1.48823900  | 2.53618500  | C          | -3.96731500 | -3.26462100 | -0.26871100 |
| H          | 2.26466600  | -0.15615900 | 3.08960000  | H          | -4.32666500 | -4.22879700 | -0.61550500 |
| H          | 1.07693900  | 0.80526300  | 3.99309900  | C          | 5.19566600  | -1.24610700 | 0.19245500  |
| <b>TS1</b> |             |             |             | H          | 5.51336500  | -0.20121100 | 0.13357600  |
| l 1        |             |             |             | H          | 5.90068600  | -1.84359000 | -0.39083600 |
| Ru         | 0.65565900  | 0.22263900  | 0.07917600  | H          | 5.27387800  | -1.56090700 | 1.23805900  |
| N          | -0.76901000 | -1.39193900 | -0.32471100 | C          | 0.34878800  | 2.30273000  | 2.67662200  |
| H          | -0.40426600 | -0.90316000 | -1.50821400 | H          | -0.06970500 | 3.07565000  | 2.02568300  |
| N          | -2.11324100 | 1.48003100  | 0.22080100  | H          | 0.95512600  | 2.80582500  | 3.43692300  |
| N          | -0.94390100 | 2.50063200  | -1.26739200 | H          | -0.47343700 | 1.80383000  | 3.19470100  |
| C          | -2.12723700 | -1.68645000 | -0.03497300 | C          | -4.83570000 | -2.37340600 | 0.35655400  |
| C          | 2.76738000  | 0.85980200  | 0.07928700  | H          | -5.87893000 | -2.62985900 | 0.50759000  |
| H          | 3.32318400  | 1.20591000  | -0.79046100 | H          | -0.24801900 | -2.26052000 | -0.22361400 |
| C          | 2.83903300  | -0.53460900 | 0.43367000  | O          | 0.31552400  | -0.14877500 | -2.05602800 |
| C          | 2.02003900  | -0.96697000 | 1.48379600  | C          | 1.31332500  | -0.79210300 | -2.81588100 |
| H          | 1.96107500  | -2.02506700 | 1.72117700  | H          | 1.67708400  | -1.71655400 | -2.33955400 |
| C          | -0.88451700 | 1.50732800  | -0.34534500 | H          | 2.16930300  | -0.12085200 | -2.96121100 |
| C          | -2.99954500 | -0.80051900 | 0.62579900  | H          | 0.91586500  | -1.04986200 | -3.80422500 |
| C          | 1.16747900  | -0.05526200 | 2.18760300  |            |             |             |             |
| H          | 0.49852700  | -0.43316800 | 2.95545000  | <b>IM2</b> |             |             |             |
| C          | 1.19034800  | 1.33628900  | 1.91145900  | l 1        |             |             |             |

|    |             |             |             |            |             |             |             |
|----|-------------|-------------|-------------|------------|-------------|-------------|-------------|
| Ru | 0.64513000  | -0.18908800 | -0.06026000 | H          | 5.08116900  | 1.98325000  | -1.25688400 |
| N  | -0.94100600 | 1.19123200  | 0.80943000  | C          | 0.11067200  | -1.39445600 | -3.21686000 |
| H  | -0.91746400 | 0.64536700  | 1.68204100  | H          | -0.37260200 | -2.26659300 | -2.76558900 |
| N  | -2.09047000 | -1.51343100 | -0.20105500 | H          | 0.71102200  | -1.75829000 | -4.05711100 |
| N  | -0.76209100 | -2.75748400 | 0.94454100  | H          | -0.66158000 | -0.74326400 | -3.63241600 |
| C  | -2.27933600 | 1.59035200  | 0.43396900  | C          | -4.88341300 | 2.41435400  | -0.16679300 |
| C  | 2.71789700  | -0.73322700 | -0.47667700 | H          | -5.89645100 | 2.72364800  | -0.40204000 |
| H  | 3.35257900  | -1.31119800 | 0.19193000  | H          | -0.41555300 | 2.03260500  | 1.03706100  |
| C  | 2.78348200  | 0.70460600  | -0.42987100 | O          | 0.63898900  | -0.44601700 | 2.00492900  |
| C  | 1.85150000  | 1.40493000  | -1.20545100 | C          | 1.79471500  | -0.15395400 | 2.70835300  |
| H  | 1.78588800  | 2.48552900  | -1.11825000 | H          | 2.14058000  | 0.89082400  | 2.59095600  |
| C  | -0.79828400 | -1.62270700 | 0.20646000  | H          | 2.64901100  | -0.80681000 | 2.43755800  |
| C  | -3.08726200 | 0.78752900  | -0.38537800 | H          | 1.60956800  | -0.31045000 | 3.78176100  |
| C  | 0.93837100  | 0.72697100  | -2.07768100 | <b>IM3</b> |             |             |             |
| H  | 0.20994000  | 1.30447300  | -2.64087000 | l l        |             |             |             |
| C  | 0.98299400  | -0.67561700 | -2.24124100 | Ru         | 1.25760200  | 0.15344000  | -0.16663200 |
| C  | -2.57067300 | -0.44319900 | -1.07119800 | N          | -2.74502800 | -1.48821700 | -1.47208800 |
| H  | -3.35040600 | -0.86467000 | -1.71164000 | H          | -1.78101700 | -1.55730400 | -1.15394300 |
| H  | -1.72548400 | -0.18154500 | -1.71586800 | N          | -1.71894700 | 0.96547900  | 0.05574300  |
| C  | -2.01399900 | -3.34320400 | 1.00475900  | N          | -0.68905900 | 2.34309300  | -1.23606200 |
| H  | -2.18885700 | -4.26185700 | 1.54189100  | C          | -3.71258000 | -1.34954300 | -0.49092700 |
| C  | -2.77473500 | 2.79923600  | 0.92339600  | C          | 3.35950000  | 0.78278100  | 0.03219900  |
| H  | -2.14019600 | 3.41527700  | 1.55682400  | H          | 4.00140500  | 1.08667400  | -0.79240000 |
| C  | 3.83017400  | 1.37647500  | 0.41972200  | C          | 3.35198600  | -0.59846300 | 0.41661300  |
| H  | 3.96426700  | 0.75037000  | 1.31219900  | C          | 2.41180800  | -0.97839500 | 1.39186400  |
| C  | -2.85441300 | -2.55927900 | 0.28509200  | H          | 2.27099900  | -2.03047200 | 1.62034000  |
| H  | -3.90673400 | -2.65266900 | 0.06858000  | C          | -0.50763600 | 1.21428400  | -0.49814600 |
| C  | 1.87150200  | -1.40685800 | -1.38661700 | C          | -3.41877800 | -0.68550900 | 0.72105800  |
| H  | 1.85750200  | -2.49335400 | -1.40967100 | C          | 1.52212600  | -0.02878500 | 1.98052400  |
| C  | 3.45226200  | 2.78075100  | 0.86438700  | H          | 0.75947300  | -0.36424800 | 2.67683200  |
| H  | 3.42151400  | 3.47840000  | 0.02039600  | C          | 1.60519500  | 1.35739000  | 1.64827100  |
| H  | 4.19065400  | 3.16872000  | 1.56943600  | C          | -2.04625000 | -0.15204300 | 0.96946900  |
| H  | 2.47546200  | 2.80337000  | 1.36122700  | H          | -1.97130600 | 0.21969900  | 1.99876800  |
| C  | -4.38763100 | 1.21490100  | -0.66403800 | H          | -1.25754700 | -0.89698300 | 0.82315000  |
| H  | -5.01379600 | 0.59546800  | -1.30222100 | C          | -1.99711300 | 2.78498000  | -1.14177300 |
| C  | 0.40915900  | -3.27939600 | 1.62631300  | H          | -2.34446800 | 3.65833700  | -1.67046300 |
| H  | 0.45058600  | -4.36214500 | 1.49299300  | C          | -5.02501600 | -1.79985500 | -0.70068800 |
| H  | 0.37256900  | -3.02942000 | 2.68727700  | H          | -5.26343900 | -2.31251200 | -1.62973000 |
| H  | 1.29619000  | -2.81336800 | 1.19937800  | C          | 4.25398600  | -1.58067500 | -0.28891000 |
| C  | -4.06728700 | 3.21460900  | 0.62511300  | H          | 4.31807100  | -1.24450300 | -1.33500300 |
| H  | -4.43359800 | 4.15771200  | 1.01749600  | C          | -2.64365000 | 1.91457800  | -0.32912200 |
| C  | 5.15708200  | 1.37923900  | -0.34681800 | H          | -3.67286100 | 1.85866000  | -0.01073200 |
| H  | 5.46232400  | 0.37056700  | -0.63960800 | C          | 2.56055200  | 1.76037000  | 0.67236200  |
| H  | 5.95258800  | 1.80349700  | 0.27112900  | H          | 2.60285400  | 2.79736900  | 0.35557500  |



|            |             |             |             |            |             |             |             |
|------------|-------------|-------------|-------------|------------|-------------|-------------|-------------|
| C          | 3.71471500  | -3.00403900 | -0.27593200 | H          | 0.80806700  | -0.54517400 | 2.74372400  |
| H          | 3.76255100  | -3.44210000 | 0.72684400  | C          | 1.57401100  | 1.23861000  | 1.78336400  |
| H          | 4.31604000  | -3.64247800 | -0.92650400 | C          | -2.01971900 | -0.20563500 | 0.93736900  |
| H          | 2.67458700  | -3.05286800 | -0.61476100 | H          | -1.91641500 | 0.11765200  | 1.98016800  |
| C          | -4.42578800 | -0.49551600 | 1.66977000  | H          | -1.23807500 | -0.94666400 | 0.74156700  |
| H          | -4.17618900 | 0.01930900  | 2.59664800  | C          | -2.02491500 | 2.80315600  | -1.06668600 |
| C          | 0.32611300  | 3.00801100  | -2.02963200 | H          | -2.38733500 | 3.69365100  | -1.55504200 |
| H          | 0.51474900  | 4.01346200  | -1.64388800 | C          | -5.05305100 | -1.74430500 | -0.74096900 |
| H          | 0.00612300  | 3.08171100  | -3.07102800 | H          | -5.32202100 | -2.19304700 | -1.69445400 |
| H          | 1.24810400  | 2.42749100  | -1.97779500 | C          | 4.29666400  | -1.51736300 | -0.32590100 |
| C          | -6.00926900 | -1.60294700 | 0.25682200  | H          | 4.38954800  | -1.12514500 | -1.34960500 |
| H          | -7.01422000 | -1.96847200 | 0.06623700  | C          | -2.65100400 | 1.90133700  | -0.27354600 |
| C          | 5.66082800  | -1.50872100 | 0.31024500  | H          | -3.67254600 | 1.82915800  | 0.06529300  |
| H          | 6.07656500  | -0.49798000 | 0.26506200  | C          | 2.47534200  | 1.70856900  | 0.77945500  |
| H          | 6.33880600  | -2.17427700 | -0.22969100 | H          | 2.49671800  | 2.76608500  | 0.53475700  |
| H          | 5.65215700  | -1.82096700 | 1.35938100  | C          | 3.79233900  | -2.95181400 | -0.40505900 |
| C          | 0.67936300  | 2.35172000  | 2.26466500  | H          | 3.81292200  | -3.43858000 | 0.57586500  |
| H          | 0.46436200  | 3.17870000  | 1.58301200  | H          | 4.43466400  | -3.54208800 | -1.06200600 |
| H          | 1.13504200  | 2.77353700  | 3.16638700  | H          | 2.76816900  | -3.01357900 | -0.78820400 |
| H          | -0.26772400 | 1.89345900  | 2.55860900  | C          | -4.37602600 | -0.59910400 | 1.68992700  |
| C          | -5.72002000 | -0.95101300 | 1.45494500  | H          | -4.09661000 | -0.14560000 | 2.63996000  |
| H          | -6.48876900 | -0.80163500 | 2.20499200  | C          | 0.26040300  | 3.05278800  | -2.03429500 |
| H          | -2.96278400 | -2.18723800 | -2.16622300 | H          | 0.06357600  | 4.12537300  | -2.02615200 |
| O          | 0.19270600  | -1.48463600 | -0.88680900 | H          | 0.20401300  | 2.68962700  | -3.06435500 |
| C          | 0.67420500  | -1.10003400 | -2.09561500 | H          | 1.26257400  | 2.86601700  | -1.64952600 |
| H          | 1.47391400  | -1.73742800 | -2.50454000 | C          | -6.00609400 | -1.61145900 | 0.25821300  |
| H          | 1.19451600  | -0.03509300 | -2.05516300 | H          | -7.01753900 | -1.96288400 | 0.07578100  |
| H          | -0.10054800 | -0.89010100 | -2.85518700 | C          | 5.68027900  | -1.45147300 | 0.32576700  |
| <b>TS2</b> |             |             |             | H          | 6.07603000  | -0.43211000 | 0.34806900  |
| I 1        |             |             |             | H          | 6.38986600  | -2.07471700 | -0.22404300 |
| Ru         | 1.23875300  | 0.16623900  | -0.21633800 | H          | 5.64246600  | -1.81923700 | 1.35624000  |
| N          | -2.79958300 | -1.38193600 | -1.56429200 | C          | 0.66971100  | 2.19173600  | 2.48906200  |
| H          | -1.82875900 | -1.47796000 | -1.28204600 | H          | 0.31284000  | 2.97872900  | 1.81907500  |
| N          | -1.71168500 | 0.94888700  | 0.06514100  | H          | 1.21064300  | 2.67936300  | 3.30645000  |
| N          | -0.71365500 | 2.38091500  | -1.19485200 | H          | -0.19515000 | 1.68604400  | 2.92308500  |
| C          | -3.73405500 | -1.30898500 | -0.54342100 | C          | -5.67694200 | -1.04107100 | 1.48718900  |
| C          | 3.33758100  | 0.80215800  | 0.10421400  | H          | -6.42127600 | -0.94087900 | 2.26945200  |
| H          | 3.99524800  | 1.18101600  | -0.67461900 | H          | -3.04132500 | -2.03344400 | -2.29568900 |
| C          | 3.35006700  | -0.59195500 | 0.39918700  | O          | 0.19364200  | -1.51282100 | -1.01164400 |
| C          | 2.38940100  | -1.04257300 | 1.33199300  | C          | 0.80014700  | -1.00680200 | -2.04624600 |
| H          | 2.26688800  | -2.10982200 | 1.49224800  | H          | 1.73618100  | -1.47010200 | -2.39336600 |
| C          | -0.50956200 | 1.22766000  | -0.50037400 | H          | 1.36978700  | 0.51180700  | -1.81271100 |
| C          | -3.40008200 | -0.72497700 | 0.69914500  | H          | 0.18071500  | -0.57140400 | -2.84780300 |
| C          | 1.53156100  | -0.15001600 | 2.03793300  | <b>IM4</b> |             |             |             |

|     |             |             |             |            |             |             |             |
|-----|-------------|-------------|-------------|------------|-------------|-------------|-------------|
| I 1 |             |             |             | H          | 6.44124500  | -1.97343100 | -0.22674900 |
| Ru  | 1.22674000  | 0.20193900  | -0.28086400 | H          | 5.66266700  | -1.78242300 | 1.34740900  |
| N   | -2.80337900 | -1.35034000 | -1.60374500 | C          | 0.64237800  | 2.03887200  | 2.63367200  |
| H   | -1.82986900 | -1.44102200 | -1.33088300 | H          | 0.22998900  | 2.82341500  | 1.99229400  |
| N   | -1.70771200 | 0.94716300  | 0.06229600  | H          | 1.20425400  | 2.53474100  | 3.43172200  |
| N   | -0.73541700 | 2.42629000  | -1.16644700 | H          | -0.18376000 | 1.49818400  | 3.09887100  |
| C   | -3.72951800 | -1.30439200 | -0.57483700 | C          | -5.65608200 | -1.09060900 | 1.47759200  |
| C   | 3.32882200  | 0.80157300  | 0.17659800  | H          | -6.39422100 | -1.01112900 | 2.26812900  |
| H   | 4.00709500  | 1.23653800  | -0.55263100 | H          | -3.04503000 | -1.98525700 | -2.34939800 |
| C   | 3.34885900  | -0.60188500 | 0.38836800  | O          | 0.18012600  | -1.51213300 | -0.97825900 |
| C   | 2.36735700  | -1.11004700 | 1.26921500  | C          | 0.83856600  | -1.05577800 | -1.99724600 |
| H   | 2.25133700  | -2.18522100 | 1.36854000  | H          | 1.77138800  | -1.55140500 | -2.30523500 |
| C   | -0.51438500 | 1.24972500  | -0.51553000 | H          | 1.50787600  | 0.98272000  | -1.63557800 |
| C   | -3.38811300 | -0.74425100 | 0.67679900  | H          | 0.28928900  | -0.53094100 | -2.79164500 |
| C   | 1.50437200  | -0.26949400 | 2.02701800  | <b>IM5</b> |             |             |             |
| H   | 0.78964300  | -0.71503200 | 2.71206800  | I 1        |             |             |             |
| C   | 1.54079800  | 1.12887500  | 1.86734900  | Ru         | -1.00616600 | -0.82882700 | -0.21506800 |
| C   | -2.00725800 | -0.22466600 | 0.91513100  | N          | 2.98829200  | 1.02021400  | -1.60447900 |
| H   | -1.90117500 | 0.08293300  | 1.96260900  | H          | 1.99765900  | 0.96188000  | -1.37299200 |
| H   | -1.22823600 | -0.96285400 | 0.70445100  | N          | 1.97837800  | -1.40918500 | -0.07764100 |
| C   | -2.04507500 | 2.83808400  | -0.99966600 | N          | 1.02000100  | -2.85947200 | -1.35036200 |
| H   | -2.41861700 | 3.74375900  | -1.44975900 | C          | 3.90122300  | 0.97712900  | -0.56967200 |
| C   | -5.04771100 | -1.74333900 | -0.77019200 | C          | -2.90581700 | -1.79687500 | 0.46730900  |
| H   | -5.32235600 | -2.17346200 | -1.73057600 | H          | -3.55122800 | -2.36699400 | -0.19487600 |
| C   | 4.33431300  | -1.47632100 | -0.34849200 | C          | -3.20041900 | -0.43078300 | 0.72751100  |
| H   | 4.42940600  | -1.05267700 | -1.35883700 | C          | -2.27458100 | 0.25937500  | 1.53220800  |
| C   | -2.65526200 | 1.90738200  | -0.22901200 | H          | -2.42233600 | 1.32320300  | 1.70720200  |
| H   | -3.67174600 | 1.81689900  | 0.12026000  | C          | 0.76972900  | -1.74352600 | -0.60605600 |
| C   | 2.42983700  | 1.65559500  | 0.88267200  | C          | 3.59107500  | 0.31826300  | 0.64271600  |
| H   | 2.45158300  | 2.72681700  | 0.70638600  | C          | -1.19015900 | -0.38777700 | 2.18656600  |
| C   | 3.87770400  | -2.92336800 | -0.47303300 | H          | -0.53268400 | 0.18471500  | 2.83476300  |
| H   | 3.90714700  | -3.43717500 | 0.49374100  | C          | -0.96017200 | -1.75867600 | 1.99916200  |
| H   | 4.54342600  | -3.47249400 | -1.14214500 | C          | 2.24290500  | -0.29161900 | 0.85123700  |
| H   | 2.85933700  | -3.00777200 | -0.86682200 | H          | 2.16656100  | -0.67745000 | 1.87468600  |
| C   | -4.35612600 | -0.64474600 | 1.67820300  | H          | 1.42062200  | 0.41405500  | 0.69768900  |
| H   | -4.07113000 | -0.20935900 | 2.63507000  | C          | 2.35871100  | -3.20327000 | -1.28284000 |
| C   | 0.23058000  | 3.15693800  | -1.96637500 | H          | 2.75591500  | -4.05142900 | -1.81716300 |
| H   | -0.20160200 | 4.11926100  | -2.23937000 | C          | 5.18558000  | 1.52509000  | -0.71848200 |
| H   | 0.47646600  | 2.60851600  | -2.87858800 | H          | 5.43535200  | 2.03329400  | -1.64710300 |
| H   | 1.14732300  | 3.32817800  | -1.39934800 | C          | -4.44590800 | 0.22556000  | 0.18674100  |
| C   | -5.99254500 | -1.63729500 | 0.23980500  | H          | -4.33828200 | 1.30545000  | 0.35737100  |
| H   | -7.00342400 | -1.99112200 | 0.05887700  | C          | 2.95929300  | -2.29167900 | -0.48235600 |
| C   | 5.70508300  | -1.38626400 | 0.32765800  | H          | 3.98689900  | -2.16569700 | -0.17928100 |
| H   | 6.07012400  | -0.35676500 | 0.38229900  | C          | -1.80727400 | -2.45383500 | 1.08523100  |

|   |             |             |             |            |             |             |             |
|---|-------------|-------------|-------------|------------|-------------|-------------|-------------|
| H | -1.63062700 | -3.50867300 | 0.89706200  | H          | 0.09415700  | 2.91640000  | -1.51853500 |
| C | -5.66538700 | -0.25454500 | 0.97699700  | H          | -2.53416700 | 2.26907300  | -0.15974400 |
| H | -5.82228600 | -1.33014900 | 0.84089700  | <b>TS3</b> |             |             |             |
| H | -6.56887000 | 0.25580600  | 0.63385600  | l l        |             |             |             |
| H | -5.55827500 | -0.06564500 | 2.04856400  | Ru         | -0.93835100 | -0.85285400 | -0.19224600 |
| C | 4.55870400  | 0.22525000  | 1.64550000  | N          | 2.97185500  | 1.10817700  | -1.57598600 |
| H | 4.29938800  | -0.29039100 | 2.56929900  | H          | 1.98493400  | 1.02974600  | -1.32897500 |
| C | 0.05166900  | -3.59190300 | -2.14560600 | N          | 2.07942900  | -1.34310800 | -0.01476500 |
| H | 0.51504900  | -4.51438200 | -2.49462600 | N          | 1.16998600  | -2.82753600 | -1.28225200 |
| H | -0.26631200 | -3.00745200 | -3.01222000 | C          | 3.89545700  | 1.11300300  | -0.54874300 |
| H | -0.82698300 | -3.83962500 | -1.54773200 | C          | -2.81834200 | -1.94641200 | 0.28541400  |
| C | 6.12756400  | 1.42558700  | 0.29434500  | H          | -3.39258700 | -2.51838200 | -0.43580600 |
| H | 7.11062400  | 1.86362300  | 0.14802000  | C          | -3.19709200 | -0.59824600 | 0.57952800  |
| C | -4.62944400 | -0.00661300 | -1.30876300 | C          | -2.34263400 | 0.09939800  | 1.45499300  |
| H | -3.75027400 | 0.31848000  | -1.87480600 | H          | -2.53121700 | 1.14836100  | 1.66387400  |
| H | -5.49877900 | 0.54262400  | -1.67844700 | C          | 0.88553600  | -1.71566700 | -0.54555200 |
| H | -4.79866700 | -1.06491100 | -1.53532300 | C          | 3.62058700  | 0.45908100  | 0.67477300  |
| C | 0.13708000  | -2.48920300 | 2.69911800  | C          | -1.24449400 | -0.52215000 | 2.11647200  |
| H | 0.75591000  | -3.05530200 | 1.99497200  | H          | -0.62563400 | 0.05919500  | 2.79367100  |
| H | -0.28610800 | -3.21179600 | 3.40399400  | C          | -0.95314400 | -1.88154200 | 1.90211800  |
| H | 0.78051800  | -1.81399600 | 3.26578600  | C          | 2.30101000  | -0.20489900 | 0.90071400  |
| C | 5.82459600  | 0.77533500  | 1.48993900  | H          | 2.24738600  | -0.58155300 | 1.92915500  |
| H | 6.56137800  | 0.69703800  | 2.28185800  | H          | 1.44536800  | 0.45969700  | 0.74297000  |
| H | 3.18946300  | 1.69542600  | -2.32506400 | C          | 2.51889200  | -3.12992500 | -1.21259200 |
| C | -0.67555300 | 0.27831400  | -2.09127800 | H          | 2.94362900  | -3.96856000 | -1.74085200 |
| H | -1.57658300 | 0.66830600  | -2.57600700 | C          | 5.15679200  | 1.70686700  | -0.71604000 |
| H | -1.41542200 | -1.60748800 | -1.52744200 | H          | 5.37961400  | 2.21053900  | -1.65397700 |
| H | -0.07245900 | -0.38314100 | -2.71541900 | C          | -4.42458800 | 0.04142200  | -0.05247000 |
| N | -0.03211100 | 0.94986200  | -1.12275600 | H          | -4.10323400 | 0.50031400  | -1.00008300 |
| C | -0.47365600 | 2.31467700  | -0.78595300 | C          | 3.08825700  | -2.19683700 | -0.41347300 |
| C | -1.93582300 | 2.71512800  | -0.96218300 | H          | 4.11019900  | -2.04124300 | -0.10470300 |
| C | 0.03657300  | 2.70890800  | 0.60649700  | C          | -1.74957000 | -2.59109000 | 0.95351500  |
| C | -2.06483700 | 4.24695100  | -0.92397900 | H          | -1.52003200 | -3.62990100 | 0.73573400  |
| H | -2.35734500 | 2.33812900  | -1.89938000 | C          | -5.01306100 | 1.14708700  | 0.82207800  |
| C | -0.69209200 | 3.93675600  | 1.16157600  | H          | -5.29753100 | 0.76200100  | 1.80711000  |
| H | -0.08948100 | 1.85495600  | 1.28436400  | H          | -5.91211900 | 1.55518300  | 0.35408900  |
| C | -1.05580100 | 4.89534500  | 0.03619200  | H          | -4.32849200 | 1.98701100  | 0.97609400  |
| H | -1.93001000 | 4.65214200  | -1.93257300 | C          | 4.59774800  | 0.42029200  | 1.67187800  |
| H | -0.07970300 | 4.42816500  | 1.92297200  | H          | 4.36527600  | -0.09029700 | 2.60549500  |
| H | -0.13955200 | 5.16762500  | -0.50420600 | C          | 0.22933900  | -3.57347700 | -2.09653400 |
| H | -1.45566600 | 5.83258900  | 0.43268100  | H          | 0.52550200  | -4.62272700 | -2.11868000 |
| H | -3.08732200 | 4.50764800  | -0.63071400 | H          | 0.20764900  | -3.19163100 | -3.12139400 |
| H | -1.61480500 | 3.62623000  | 1.67452100  | H          | -0.76903400 | -3.48830900 | -1.66753900 |
| H | 1.11744700  | 2.89192800  | 0.55271500  | C          | 6.10930500  | 1.65944100  | 0.29071300  |

|            |             |             |             |   |             |             |             |
|------------|-------------|-------------|-------------|---|-------------|-------------|-------------|
| H          | 7.07372700  | 2.13266900  | 0.13015400  | C | -3.22217800 | -0.53247900 | 0.57391300  |
| C          | -5.50047300 | -0.99128800 | -0.38269800 | C | -2.32436800 | 0.04873500  | 1.48345200  |
| H          | -5.18347300 | -1.70879400 | -1.14367300 | H | -2.45190400 | 1.08606500  | 1.77998900  |
| H          | -6.38975800 | -0.49080200 | -0.77236600 | C | 0.89021200  | -1.70129100 | -0.50629800 |
| H          | -5.80204200 | -1.55203200 | 0.50829200  | C | 3.61737900  | 0.45674500  | 0.72978300  |
| C          | 0.16214300  | -2.57616600 | 2.60996800  | C | -1.20386000 | -0.67056100 | 1.99669500  |
| H          | 0.76582400  | -3.17509100 | 1.92112800  | H | -0.50873800 | -0.18277900 | 2.67377200  |
| H          | -0.24457200 | -3.26068100 | 3.36132800  | C | -1.02971900 | -2.05326200 | 1.69100700  |
| H          | 0.81728900  | -1.87298200 | 3.12774100  | C | 2.30191900  | -0.21240000 | 0.96554900  |
| C          | 5.83981800  | 1.01738500  | 1.49855600  | H | 2.26067600  | -0.58753400 | 1.99570400  |
| H          | 6.58409200  | 0.98132700  | 2.28663900  | H | 1.44377300  | 0.44997800  | 0.81412400  |
| H          | 3.14388400  | 1.78585600  | -2.30220200 | C | 2.51865100  | -3.12135900 | -1.17190900 |
| C          | -0.56305100 | 0.17184900  | -2.13908800 | H | 2.94448900  | -3.95268300 | -1.71089700 |
| H          | -1.42028800 | 0.55370700  | -2.70526000 | C | 5.14011000  | 1.70414100  | -0.67566400 |
| H          | -1.21856100 | -1.20829600 | -1.75526900 | H | 5.35793300  | 2.19874800  | -1.61957900 |
| H          | 0.15175700  | -0.38647100 | -2.75227600 | C | -4.44131800 | 0.19903600  | 0.03144900  |
| N          | -0.02300100 | 0.89969100  | -1.12170700 | H | -4.17291900 | 0.60472600  | -0.95651500 |
| C          | -0.55514500 | 2.24602500  | -0.85087400 | C | 3.08329100  | -2.20721400 | -0.34773000 |
| C          | -2.03456100 | 2.53661800  | -1.08133200 | H | 4.10292200  | -2.06269600 | -0.02586600 |
| C          | -0.13483200 | 2.67575400  | 0.56131300  | C | -1.93145400 | -2.66174400 | 0.77579000  |
| C          | -2.29635700 | 4.05022900  | -1.03616200 | H | -1.78424700 | -3.69591200 | 0.48073500  |
| H          | -2.39026300 | 2.13333400  | -2.03541700 | C | -4.86652200 | 1.36372000  | 0.92135900  |
| C          | -0.97690900 | 3.84054400  | 1.09255500  | H | -5.11283100 | 1.01556800  | 1.93038100  |
| H          | -0.22508400 | 1.80811800  | 1.22766400  | H | -5.75996200 | 1.83927700  | 0.51009000  |
| C          | -1.37424400 | 4.77257100  | -0.04320200 | H | -4.10607800 | 2.14481000  | 1.01291300  |
| H          | -2.17293300 | 4.47759700  | -2.03693300 | C | 4.59393900  | 0.44128800  | 1.72802000  |
| H          | -0.43369000 | 4.37450600  | 1.87728200  | H | 4.36623300  | -0.05910500 | 2.66832500  |
| H          | -0.46387000 | 5.11471100  | -0.55272000 | C | 0.23316600  | -3.53347500 | -2.08316100 |
| H          | -1.85923700 | 5.67537800  | 0.33835400  | H | 0.22036100  | -4.58787100 | -1.79709700 |
| H          | -3.34551600 | 4.21705500  | -0.76638900 | H | 0.50734900  | -3.45646200 | -3.13818100 |
| H          | -1.89140200 | 3.45664600  | 1.57120900  | H | -0.76252500 | -3.11228600 | -1.93774900 |
| H          | 0.93038600  | 2.93975100  | 0.55221100  | C | 6.09187000  | 1.68091000  | 0.33262300  |
| H          | 0.00130500  | 2.87800300  | -1.56645200 | H | 7.05070000  | 2.16383900  | 0.16723500  |
| H          | -2.61601800 | 2.03284500  | -0.30243200 | C | -5.62289300 | -0.75304100 | -0.16089400 |
| <b>IM6</b> |             |             |             | H | -5.43242900 | -1.53201500 | -0.90309500 |
| l l        |             |             |             | H | -6.49712900 | -0.19569700 | -0.50495600 |
| Ru         | -0.96964100 | -0.85041900 | -0.17845500 | H | -5.89354900 | -1.24269400 | 0.78040600  |
| N          | 2.96100000  | 1.07001600  | -1.52820100 | C | 0.07847300  | -2.84343300 | 2.30330100  |
| H          | 1.97383300  | 0.97921200  | -1.27600100 | H | 0.45133700  | -3.61691900 | 1.62641700  |
| N          | 2.07662300  | -1.35017700 | 0.04991800  | H | -0.28380700 | -3.34193100 | 3.20838200  |
| N          | 1.17469400  | -2.80077900 | -1.25899600 | H | 0.91680600  | -2.20740800 | 2.59473100  |
| C          | 3.88530200  | 1.09809400  | -0.50215000 | C | 5.82900400  | 1.05074900  | 1.54819500  |
| C          | -2.92092200 | -1.87399400 | 0.15110400  | H | 6.57263300  | 1.03400900  | 2.33757300  |
| H          | -3.53178400 | -2.33107200 | -0.62146700 | H | 3.12286500  | 1.74574800  | -2.25875100 |

|            |             |             |             |   |             |             |             |
|------------|-------------|-------------|-------------|---|-------------|-------------|-------------|
| C          | -0.45713600 | 0.17488400  | -2.24829500 | H | 3.12388300  | -1.16633700 | -3.90080700 |
| H          | -1.09292800 | 0.77529900  | -2.91043400 | C | 2.41984900  | 2.96697200  | 1.41744000  |
| H          | -1.17765700 | -0.73629500 | -2.04891300 | H | 1.54124800  | 3.53838500  | 1.70936300  |
| H          | 0.35204700  | -0.30693000 | -2.81390500 | C | -2.81288600 | -0.52382700 | 2.43449100  |
| N          | -0.00547600 | 0.81746000  | -1.06359200 | H | -3.66583200 | -0.27374500 | 1.78593400  |
| C          | -0.49085600 | 2.18732300  | -0.84942700 | C | 3.67912700  | -1.01289600 | -1.75889000 |
| C          | -1.96952000 | 2.49081400  | -1.07405300 | H | 4.75116100  | -1.07022100 | -1.65526100 |
| C          | -0.07059900 | 2.64453500  | 0.55437800  | C | -1.28082700 | -2.48986300 | -0.51828400 |
| C          | -2.22005100 | 4.00513400  | -1.07348500 | H | -1.53577000 | -2.72968700 | -1.54674300 |
| H          | -2.34255400 | 2.05156000  | -2.00693000 | C | -2.16307100 | 0.78628100  | 2.86957800  |
| C          | -0.90032300 | 3.83083900  | 1.05928000  | H | -1.31090100 | 0.60681900  | 3.53772900  |
| H          | -0.18061400 | 1.79107700  | 1.23760800  | H | -2.87304600 | 1.40986300  | 3.41980800  |
| C          | -1.29090600 | 4.74132700  | -0.09649100 | H | -1.80818900 | 1.35504700  | 2.00166300  |
| H          | -2.08861100 | 4.40456500  | -2.08491100 | C | 4.65772800  | 1.49395900  | 0.69397200  |
| H          | -0.35077800 | 4.37763800  | 1.83071400  | H | 5.53076700  | 0.91271000  | 0.40346100  |
| H          | -0.37821800 | 5.06448100  | -0.61409500 | C | 0.43274400  | -0.93380700 | -3.28889900 |
| H          | -1.76753000 | 5.65636800  | 0.26618200  | H | 0.30675000  | -1.91843600 | -3.74896900 |
| H          | -3.26823000 | 4.19141700  | -0.81168400 | H | 0.56050000  | -0.18858700 | -4.07735000 |
| H          | -1.81745100 | 3.46688700  | 1.54848400  | H | -0.45119100 | -0.68781200 | -2.69969900 |
| H          | 0.99814000  | 2.89316100  | 0.54907700  | C | 3.61579900  | 3.61630100  | 1.12923000  |
| H          | 0.07114100  | 2.79579000  | -1.58331000 | H | 3.66738200  | 4.69879800  | 1.19077400  |
| H          | -2.53858600 | 2.01671800  | -0.26843700 | C | -3.34108800 | -1.30867100 | 3.63407900  |
| <b>IM7</b> |             |             |             | H | -3.83144100 | -2.23657600 | 3.32849900  |
| l 1        |             |             |             | H | -4.06518700 | -0.71370300 | 4.19676600  |
| Ru         | -0.14547000 | -0.78519900 | 0.18436700  | H | -2.52897100 | -1.57190700 | 4.32109200  |
| N          | 1.11510100  | 0.89149300  | 1.63504300  | C | 0.86159200  | -3.84401600 | -0.76262500 |
| H          | 0.33302600  | 1.54178100  | 1.63562700  | H | 0.80142800  | -3.59508100 | -1.82548000 |
| N          | 2.84007200  | -0.87598600 | -0.66738300 | H | 0.60756700  | -4.90433200 | -0.66117600 |
| N          | 1.58316500  | -0.92489700 | -2.40693400 | H | 1.90035700  | -3.72007800 | -0.44390400 |
| C          | 2.33818200  | 1.57612300  | 1.34785000  | C | 4.74493000  | 2.87947100  | 0.78299500  |
| C          | -2.18915300 | -1.74793100 | 0.28786400  | H | 5.68466800  | 3.38104600  | 0.57616900  |
| H          | -3.10916700 | -1.37751300 | -0.15960800 | H | 1.15450200  | 0.45561900  | 2.55359600  |
| C          | -1.87720300 | -1.37610600 | 1.60913200  | N | -0.71933000 | 1.01942700  | -0.55947500 |
| C          | -0.61393900 | -1.81932500 | 2.12441200  | C | 0.15278600  | 1.83519600  | -1.37916600 |
| H          | -0.31167600 | -1.49977700 | 3.12045300  | H | 1.19950300  | 1.64701200  | -1.12970700 |
| C          | 1.53315300  | -0.80157800 | -1.05071300 | H | 0.02833700  | 1.68927400  | -2.46856000 |
| C          | 3.46038400  | 0.83036500  | 0.95926800  | H | -0.02272100 | 2.90345400  | -1.19223700 |
| C          | 0.22961100  | -2.69178100 | 1.40235000  | C | -2.14005800 | 1.27694400  | -0.77962000 |
| H          | 1.16400600  | -3.03265800 | 1.83796000  | C | -2.50824300 | 2.76022500  | -0.65894900 |
| C          | -0.06871000 | -3.00795000 | 0.05255000  | C | -2.71943400 | 0.70710900  | -2.07980900 |
| C          | 3.33041200  | -0.64249700 | 0.69620300  | H | -2.66648600 | 0.77194200  | 0.04578400  |
| H          | 4.29633000  | -1.14721900 | 0.78244700  | C | -4.02289400 | 2.93112800  | -0.67009800 |
| H          | 2.63083100  | -1.13466900 | 1.37741800  | H | -2.08132100 | 3.32297700  | -1.50000000 |
| C          | 2.88568900  | -1.05379500 | -2.85511600 | H | -2.06531000 | 3.17571100  | 0.25656100  |

|            |             |             |             |            |             |             |             |
|------------|-------------|-------------|-------------|------------|-------------|-------------|-------------|
| C          | -4.23389500 | 0.89113100  | -2.12825900 | H          | -1.84337000 | 1.60203600  | 1.89717400  |
| H          | -2.25374700 | 1.20891100  | -2.94151900 | C          | 4.45815500  | 1.92688700  | 0.66499200  |
| H          | -2.45685800 | -0.35825200 | -2.15608100 | H          | 5.40433000  | 1.41704800  | 0.49150900  |
| C          | -4.62533100 | 2.35263200  | -1.94502600 | C          | 0.50187000  | -1.69304900 | -3.08305000 |
| H          | -4.28571200 | 3.98879800  | -0.56533000 | H          | 0.45207300  | -2.77391500 | -3.24771000 |
| H          | -4.45256700 | 2.41932600  | 0.20526300  | H          | 0.56924700  | -1.19229000 | -4.05123500 |
| H          | -4.63985400 | 0.49375700  | -3.06448500 | H          | -0.40037700 | -1.36185200 | -2.56671600 |
| H          | -4.68936100 | 0.29606300  | -1.32028100 | C          | 3.21102000  | 3.95117700  | 0.99315100  |
| H          | -5.71493000 | 2.45661000  | -1.93888700 | H          | 3.16655400  | 5.03349400  | 1.06686700  |
| H          | -4.26589600 | 2.93242200  | -2.80693100 | C          | -3.53070100 | -0.98568000 | 3.50888100  |
| <b>TS4</b> |             |             |             | H          | -3.95767700 | -1.94897500 | 3.21772300  |
| l l        |             |             |             | H          | -4.33513500 | -0.37123300 | 3.92151200  |
| Ru         | 0.00850600  | -0.77700700 | 0.31512500  | H          | -2.80985200 | -1.16962300 | 4.31312800  |
| N          | 0.83191500  | 1.10321800  | 1.15669100  | C          | 1.13343500  | -3.93701600 | -0.00206800 |
| H          | 0.02469800  | 1.44733400  | 0.33396800  | H          | 1.09171900  | -3.94735400 | -1.09393300 |
| N          | 2.91478500  | -0.80660600 | -0.61848200 | H          | 0.93878900  | -4.95773900 | 0.34238700  |
| N          | 1.65054500  | -1.35066600 | -2.26782900 | H          | 2.15097400  | -3.67401100 | 0.29881700  |
| C          | 2.07183000  | 1.80744700  | 1.03692700  | C          | 4.42624600  | 3.31242700  | 0.76031800  |
| C          | -2.00843100 | -1.78107800 | 0.43726400  | H          | 5.34012000  | 3.88825100  | 0.65613000  |
| H          | -2.89654500 | -1.51780900 | -0.13443500 | H          | 0.45087000  | 1.23737100  | 2.08999500  |
| C          | -1.81789500 | -1.17878600 | 1.71012400  | N          | -0.64847300 | 1.00372500  | -0.79802500 |
| C          | -0.59263900 | -1.46865300 | 2.36417100  | C          | 0.13569800  | 1.47576800  | -1.93100200 |
| H          | -0.35610500 | -0.95899100 | 3.29672700  | H          | 1.19529200  | 1.50731900  | -1.65703500 |
| C          | 1.60906200  | -0.95524000 | -0.96393700 | H          | 0.04123100  | 0.86300100  | -2.83851800 |
| C          | 3.29696300  | 1.16279700  | 0.80666100  | H          | -0.15460900 | 2.49829100  | -2.20487600 |
| C          | 0.35047100  | -2.39655100 | 1.84572600  | C          | -2.09395600 | 1.16858000  | -0.97368900 |
| H          | 1.26752400  | -2.60319900 | 2.38822500  | C          | -2.52614300 | 2.63858700  | -1.03011400 |
| C          | 0.12781300  | -2.99911600 | 0.58092000  | C          | -2.69048300 | 0.40518400  | -2.15552000 |
| C          | 3.36280200  | -0.32824800 | 0.69416400  | H          | -2.55245600 | 0.75932300  | -0.06222400 |
| H          | 4.38590800  | -0.68662800 | 0.83333800  | C          | -4.04789800 | 2.73795700  | -0.99649900 |
| H          | 2.72416200  | -0.81227400 | 1.43895400  | H          | -2.15526200 | 3.10629000  | -1.95221500 |
| C          | 2.95532700  | -1.42455700 | -2.72311500 | H          | -2.07251100 | 3.18719500  | -0.19431800 |
| H          | 3.19321800  | -1.71802900 | -3.73311300 | C          | -4.21286100 | 0.50003900  | -2.14413200 |
| C          | 2.04701400  | 3.20480200  | 1.12397700  | H          | -2.30085900 | 0.82016700  | -3.09685000 |
| H          | 1.09289400  | 3.69945900  | 1.29393400  | H          | -2.36217200 | -0.64427700 | -2.11862600 |
| C          | -2.86325000 | -0.27914800 | 2.32878200  | C          | -4.67644700 | 1.95342600  | -2.14287500 |
| H          | -3.62970400 | -0.10818700 | 1.55826700  | H          | -4.36033400 | 3.78648500  | -1.02976700 |
| C          | 3.75183400  | -1.07370800 | -1.68444100 | H          | -4.41357700 | 2.33970500  | -0.03686600 |
| H          | 4.82436300  | -0.99001000 | -1.60732300 | H          | -4.64079100 | -0.04240700 | -2.99356100 |
| C          | -1.07505100 | -2.68499700 | -0.12496300 | H          | -4.59499300 | 0.00135900  | -1.23833300 |
| H          | -1.26525600 | -3.12934400 | -1.09705200 | H          | -5.76849200 | 2.00502000  | -2.09098700 |
| C          | -2.30558600 | 1.07884700  | 2.74225400  | H          | -4.39150700 | 2.42038500  | -3.09618500 |
| H          | -1.55708300 | 0.98201500  | 3.53828700  | <b>IM8</b> |             |             |             |
| H          | -3.10014000 | 1.71864300  | 3.13549800  | l l        |             |             |             |

|    |             |             |             |            |             |             |             |
|----|-------------|-------------|-------------|------------|-------------|-------------|-------------|
| Ru | -0.10606000 | -0.84037100 | -0.29936300 | H          | 3.11700500  | -2.08486200 | -3.77494300 |
| N  | -0.94677200 | 0.44560100  | -1.80605600 | C          | -1.43629500 | -3.84076300 | 0.49278500  |
| H  | 0.41331900  | 1.70364900  | -0.32263100 | H          | -1.46710900 | -3.71449100 | 1.57770500  |
| N  | -3.11028100 | -0.51305000 | 0.48597600  | H          | -1.30744700 | -4.90893700 | 0.29016900  |
| N  | -1.94207100 | -0.99873000 | 2.21849700  | H          | -2.40532300 | -3.54224400 | 0.08426100  |
| C  | -1.71105500 | 1.56074400  | -1.52809700 | C          | -3.37271200 | 3.78598400  | -0.98892900 |
| C  | 1.85097600  | -1.94027900 | 0.02164800  | H          | -4.01225600 | 4.63716100  | -0.78123000 |
| H  | 2.70376100  | -1.62632300 | 0.62163400  | H          | -0.11274800 | 0.75251200  | -2.30472800 |
| C  | 1.82140000  | -1.56847200 | -1.36041300 | N          | 0.54756100  | 1.16851400  | 0.53705200  |
| C  | 0.66950500  | -1.93765000 | -2.08566500 | C          | -0.33339500 | 1.81987700  | 1.52603500  |
| H  | 0.54272100  | -1.58508700 | -3.10663200 | H          | -1.35175400 | 1.84454500  | 1.13212600  |
| C  | -1.82742100 | -0.71684200 | 0.88286400  | H          | -0.33043300 | 1.25867200  | 2.46174300  |
| C  | -3.03518300 | 1.38555500  | -1.05570000 | H          | -0.01688700 | 2.84821100  | 1.73188500  |
| C  | -0.39838100 | -2.66681500 | -1.49211700 | C          | 1.99941000  | 1.27764600  | 0.86690400  |
| H  | -1.29038500 | -2.88528500 | -2.06951900 | C          | 2.54401000  | 2.70092600  | 0.76282700  |
| C  | -0.31971300 | -3.06794400 | -0.12869500 | C          | 2.34372800  | 0.66557300  | 2.21524000  |
| C  | -3.50856500 | -0.01380600 | -0.84281400 | H          | 2.50293700  | 0.68320500  | 0.09301300  |
| H  | -4.59757000 | -0.08856300 | -0.88571100 | C          | 4.05945100  | 2.68563600  | 0.94481200  |
| H  | -3.07336100 | -0.68094700 | -1.59321800 | H          | 2.08997900  | 3.33787100  | 1.53403900  |
| C  | -3.26213700 | -0.96095800 | 2.62889000  | H          | 2.27122600  | 3.13703800  | -0.20807400 |
| H  | -3.55040800 | -1.15602400 | 3.64957100  | C          | 3.85712400  | 0.64548900  | 2.40881700  |
| C  | -1.26063600 | 2.88193400  | -1.73788400 | H          | 1.87955100  | 1.25334100  | 3.01992900  |
| H  | -0.25616200 | 3.03657300  | -2.13667600 | H          | 1.92822100  | -0.34838300 | 2.28278200  |
| C  | 2.97896800  | -0.83514000 | -2.00000700 | C          | 4.44889600  | 2.04341100  | 2.27196700  |
| H  | 3.65985100  | -0.54456100 | -1.18531000 | H          | 4.45786600  | 3.70194200  | 0.87334500  |
| C  | -3.99616600 | -0.64707900 | 1.53468500  | H          | 4.51173400  | 2.11937300  | 0.11626800  |
| H  | -5.05790600 | -0.50660400 | 1.40657100  | H          | 4.10859500  | 0.21080100  | 3.38106800  |
| C  | 0.84681900  | -2.72998000 | 0.61786400  | H          | 4.30820100  | -0.01453800 | 1.65097800  |
| H  | 0.92981400  | -3.02322800 | 1.65961100  | H          | 5.53767200  | 2.00692300  | 2.37320500  |
| C  | 2.55190800  | 0.43416100  | -2.72977100 | H          | 4.08433200  | 2.67020900  | 3.09768000  |
| H  | 1.88646300  | 0.21378200  | -3.57255100 | <b>IM9</b> |             |             |             |
| H  | 3.41996800  | 0.95826100  | -3.13880700 | l l        |             |             |             |
| H  | 2.02833700  | 1.13011300  | -2.06159400 | Ru         | 0.62678000  | -0.34824800 | -0.46158000 |
| C  | -3.83856500 | 2.48794400  | -0.78602200 | N          | -0.65825700 | 1.12769300  | -0.80778500 |
| H  | -4.85359800 | 2.32637800  | -0.42528600 | H          | -0.13250200 | 1.51981600  | 1.36507000  |
| C  | -0.85728800 | -1.28437100 | 3.13326800  | N          | -2.10517100 | -1.67589700 | -0.01974500 |
| H  | -0.83515300 | -2.34552800 | 3.40135100  | N          | -0.85637300 | -2.19631400 | 1.64388800  |
| H  | -0.97994400 | -0.69713700 | 4.04657000  | C          | -2.00942300 | 1.41634300  | -0.69140100 |
| H  | 0.08405800  | -1.01658800 | 2.65373200  | C          | 2.57709100  | -0.56884600 | 0.57246100  |
| C  | -2.08147000 | 3.97300500  | -1.47927600 | H          | 2.76986400  | -0.50546900 | 1.64131200  |
| H  | -1.70842400 | 4.97799300  | -1.65693200 | C          | 2.65831100  | 0.62997100  | -0.20957900 |
| C  | 3.74436300  | -1.77485300 | -2.93235800 | C          | 2.37386300  | 0.52455400  | -1.58977200 |
| H  | 4.07569600  | -2.67852100 | -2.41412000 | H          | 2.34944800  | 1.41805500  | -2.20567500 |
| H  | 4.62767700  | -1.27833800 | -3.34273300 | C          | -0.85879500 | -1.46990100 | 0.48545800  |

|   |             |             |             |            |             |             |             |
|---|-------------|-------------|-------------|------------|-------------|-------------|-------------|
| C | -3.00396600 | 0.42503000  | -0.86859400 | O          | 0.19925800  | 2.11838000  | 2.04762500  |
| C | 1.96039800  | -0.71480000 | -2.15241300 | <b>TSS</b> |             |             |             |
| H | 1.63424600  | -0.74600600 | -3.18845100 | 1 1        |             |             |             |
| C | 1.94059500  | -1.92211300 | -1.38938000 | Ru         | 0.67707100  | -0.24848600 | -0.08763000 |
| C | -2.60395200 | -0.97258400 | -1.20387100 | N          | -0.58912700 | 1.43570200  | -0.50505200 |
| H | -3.44508000 | -1.54632100 | -1.59950300 | H          | -0.19310000 | 2.16544100  | 0.36895200  |
| H | -1.79393900 | -0.98676500 | -1.94361200 | N          | -2.07495900 | -1.54080200 | -0.13575500 |
| C | -2.06973300 | -2.82546600 | 1.84255500  | N          | -1.10727900 | -2.07252300 | 1.70781100  |
| H | -2.25894000 | -3.44669400 | 2.70360800  | C          | -2.03135500 | 1.58287400  | -0.48151700 |
| C | -2.41439600 | 2.74353000  | -0.44022000 | C          | 2.69460500  | -1.02361400 | 0.40096400  |
| H | -1.64957400 | 3.50409300  | -0.29751500 | H          | 3.10563500  | -1.15865100 | 1.39885300  |
| C | 3.05589000  | 1.92234200  | 0.45505100  | C          | 2.93327100  | 0.21885600  | -0.28309000 |
| H | 2.71856500  | 1.85593700  | 1.49757700  | C          | 2.31995500  | 0.39541700  | -1.53438900 |
| C | -2.86123600 | -2.49131000 | 0.79279300  | H          | 2.40782400  | 1.35081600  | -2.04339700 |
| H | -3.87882000 | -2.75903000 | 0.55623200  | C          | -0.94613100 | -1.32243300 | 0.58455800  |
| C | 2.27830800  | -1.81945800 | -0.01753500 | C          | -2.91136300 | 0.58932000  | -0.93925200 |
| H | 2.19300300  | -2.70136700 | 0.60994700  | C          | 1.48300100  | -0.61925700 | -2.09832500 |
| C | 2.41263300  | 3.15803500  | -0.15375700 | H          | 0.97031100  | -0.43101400 | -3.03849600 |
| H | 2.71017000  | 3.31366200  | -1.19637400 | C          | 1.30909000  | -1.87575300 | -1.45785200 |
| H | 2.71966800  | 4.04780800  | 0.40030500  | C          | -2.40835500 | -0.76383100 | -1.33577100 |
| H | 1.32161400  | 3.10872600  | -0.08839000 | H          | -3.16247500 | -1.32324200 | -1.89454500 |
| C | -4.34749700 | 0.77853500  | -0.76520900 | H          | -1.50097300 | -0.70975200 | -1.94430000 |
| H | -5.10464100 | 0.01296300  | -0.92110200 | C          | -2.32762800 | -2.72741300 | 1.69212700  |
| C | 0.24185500  | -2.30354000 | 2.58316600  | H          | -2.64228900 | -3.36917200 | 2.49955100  |
| H | 0.77162300  | -3.25273900 | 2.46286100  | C          | -2.55163100 | 2.78829700  | -0.00261200 |
| H | -0.14238700 | -2.24318000 | 3.60287300  | H          | -1.86877300 | 3.54215900  | 0.37681200  |
| H | 0.92756400  | -1.47342000 | 2.41899700  | C          | 3.79805900  | 1.27084300  | 0.36198200  |
| C | -3.75437800 | 3.07106700  | -0.33412500 | H          | 3.71329300  | 1.12170300  | 1.44829300  |
| H | -4.04113100 | 4.09689400  | -0.12534000 | C          | -2.94098700 | -2.38329900 | 0.53300500  |
| C | 4.58526500  | 2.02231000  | 0.43947300  | H          | -3.90355800 | -2.65814800 | 0.13092900  |
| H | 5.05953800  | 1.15403500  | 0.90591100  | C          | 1.94300600  | -2.06054700 | -0.18679100 |
| H | 4.90931000  | 2.91336100  | 0.98273600  | H          | 1.76532900  | -2.97954300 | 0.36504000  |
| H | 4.96258900  | 2.09975600  | -0.58557300 | C          | 3.37612100  | 2.69797100  | 0.04335200  |
| C | 1.52145600  | -3.21848900 | -1.99657100 | H          | 3.51724500  | 2.93392500  | -1.01725700 |
| H | 1.05574200  | -3.87317500 | -1.25573000 | H          | 3.99849700  | 3.40067500  | 0.60227600  |
| H | 2.38729700  | -3.74827300 | -2.40821800 | H          | 2.33231200  | 2.88809200  | 0.31796800  |
| H | 0.81200600  | -3.06676900 | -2.81351800 | C          | -4.28571700 | 0.83337300  | -0.92312300 |
| C | -4.73184100 | 2.08733300  | -0.49527800 | H          | -4.96024700 | 0.05662400  | -1.27860200 |
| H | -5.78394000 | 2.34286900  | -0.42514000 | C          | -0.16127200 | -2.15631000 | 2.80466700  |
| H | 1.21290600  | 0.64903900  | 3.14742300  | H          | 0.19636000  | -3.18147200 | 2.92784300  |
| H | -0.17433800 | 1.97770300  | -1.09398700 | H          | -0.63280200 | -1.82903500 | 3.73367900  |
| C | 0.37669700  | 1.36838300  | 3.22351000  | H          | 0.68234400  | -1.50074100 | 2.58492700  |
| H | 0.61811200  | 2.06572100  | 4.02778900  | C          | -3.92355800 | 3.01632700  | 0.00341600  |
| H | -0.52464500 | 0.81073000  | 3.51890900  | H          | -4.30604700 | 3.96080200  | 0.37740900  |



|             |             |             |             |             |             |             |             |
|-------------|-------------|-------------|-------------|-------------|-------------|-------------|-------------|
| C           | 5.25571800  | 1.00802400  | -0.03267800 | H           | -3.95907100 | -2.73386800 | 0.23997900  |
| H           | 5.57802100  | -0.00549700 | 0.22363700  | C           | 1.81161800  | -2.08362400 | -0.05084400 |
| H           | 5.91768100  | 1.71085900  | 0.47900000  | H           | 1.55570100  | -2.97593900 | 0.51508400  |
| H           | 5.39524200  | 1.14183300  | -1.11045800 | C           | 3.78135600  | 2.53476100  | -0.13698700 |
| C           | 0.48155200  | -2.96035600 | -2.06190500 | H           | 4.23139500  | 2.48975400  | -1.13487600 |
| H           | -0.03619800 | -3.54574200 | -1.29721000 | H           | 4.38112900  | 3.23865800  | 0.44520600  |
| H           | 1.12145400  | -3.64932500 | -2.62321600 | H           | 2.77531200  | 2.95383400  | -0.22997900 |
| H           | -0.26144300 | -2.56645400 | -2.75933800 | C           | -4.38100300 | 0.77288700  | -0.60095100 |
| C           | -4.79758100 | 2.04167900  | -0.46605100 | H           | -5.10409100 | -0.01815600 | -0.78965000 |
| H           | -5.86864100 | 2.21631800  | -0.46898000 | C           | -0.15617500 | -2.14192800 | 2.79989400  |
| H           | 0.56670500  | 0.64422500  | 1.56491300  | H           | 0.37255500  | -3.09947500 | 2.78852700  |
| H           | -0.25641500 | 1.85545800  | -1.37320800 | H           | -0.65575100 | -2.02765700 | 3.76348300  |
| C           | 0.59559100  | 1.68115300  | 2.18200100  | H           | 0.55475300  | -1.32681300 | 2.66243300  |
| H           | 1.64648700  | 1.66781900  | 2.53363200  | C           | -3.86979300 | 2.99368100  | 0.16275400  |
| H           | -0.08699300 | 1.40536000  | 3.01218300  | H           | -4.18777000 | 3.95157800  | 0.56222300  |
| O           | 0.24341200  | 2.70431500  | 1.43418700  | C           | 5.20959300  | 0.60260400  | 0.59746300  |
| <b>IM10</b> |             |             |             | H           | 5.24710900  | -0.36194800 | 1.11211700  |
| I 1         |             |             |             | H           | 5.87001600  | 1.29200300  | 1.12956400  |
| Ru          | 0.60420200  | -0.27022700 | -0.07906800 | H           | 5.61719700  | 0.46065900  | -0.40873300 |
| N           | -0.71150200 | 1.34658600  | -0.94767500 | C           | 0.71815000  | -3.14122900 | -2.09035800 |
| H           | -0.20939000 | 2.20574900  | -0.72006300 | H           | -0.00655100 | -3.60690700 | -1.41555800 |
| N           | -2.15999700 | -1.58414700 | -0.09030800 | H           | 1.43346400  | -3.91913800 | -2.37768900 |
| N           | -1.13399200 | -2.07389900 | 1.73197000  | H           | 0.19507400  | -2.82701000 | -2.99628600 |
| C           | -2.10641800 | 1.55523800  | -0.63229200 | C           | -4.80504900 | 1.99598400  | -0.09186600 |
| C           | 2.53056900  | -1.04065900 | 0.58407700  | H           | -5.85794600 | 2.16680600  | 0.10720800  |
| H           | 2.84037200  | -1.15521500 | 1.61985100  | H           | 0.35716800  | 0.50279800  | 1.32308500  |
| C           | 2.89403200  | 0.14960000  | -0.13264900 | H           | -0.61342600 | 1.22394300  | -1.95332100 |
| C           | 2.39542900  | 0.27378400  | -1.43919300 | C           | 0.67397600  | 2.94711600  | 1.65162000  |
| H           | 2.55964100  | 1.19855400  | -1.98560100 | H           | 1.65558500  | 2.66558200  | 2.08809800  |
| C           | -1.00714300 | -1.33154100 | 0.59481700  | H           | -0.21442200 | 2.71800200  | 2.27663700  |
| C           | -3.03386200 | 0.53424000  | -0.87138000 | O           | 0.58426600  | 3.49445300  | 0.57325300  |
| C           | 1.67752100  | -0.78994300 | -2.08475400 | <b>IM11</b> |             |             |             |
| H           | 1.32553100  | -0.65004100 | -3.10433400 | I 1         |             |             |             |
| C           | 1.42296200  | -2.00231600 | -1.43249700 | Ru          | -0.44445000 | -0.93355800 | 0.00502800  |
| C           | -2.57237500 | -0.83453800 | -1.27819700 | N           | -0.44015200 | 1.12902500  | -0.91207800 |
| H           | -3.37506600 | -1.39704700 | -1.76103600 | H           | 0.38873800  | 1.54971000  | -0.46242900 |
| H           | -1.72206700 | -0.81627200 | -1.96850600 | N           | -3.38888200 | -0.22794400 | -0.04136800 |
| C           | -2.34082200 | -2.75309200 | 1.75674600  | N           | -2.87197800 | -0.88325300 | 1.93898500  |
| H           | -2.61757400 | -3.39640600 | 2.57656200  | C           | -1.47951300 | 2.13510000  | -0.90685300 |
| C           | -2.52216400 | 2.77765900  | -0.11061400 | C           | 1.45481600  | -2.18753600 | 0.15148700  |
| H           | -1.78546800 | 3.55687100  | 0.06656800  | H           | 2.34128000  | -1.97290700 | 0.74450200  |
| C           | 3.78754200  | 1.16890600  | 0.53086200  | C           | 1.41283200  | -1.77370100 | -1.19020800 |
| H           | 3.42583600  | 1.27844200  | 1.56478500  | C           | 0.21843100  | -2.05085000 | -1.94246000 |
| C           | -2.99291400 | -2.43372000 | 0.61422700  | H           | 0.16005500  | -1.71898200 | -2.97767600 |

|   |             |             |             |            |             |             |             |
|---|-------------|-------------|-------------|------------|-------------|-------------|-------------|
| C | -2.32585200 | -0.62565300 | 0.71579200  | H          | 0.16244800  | 3.12213700  | 1.87212700  |
| C | -2.80741900 | 1.80845200  | -1.21313000 | N          | 1.67573200  | 2.17627900  | 0.89945200  |
| C | -0.85349200 | -2.75875000 | -1.39425500 | C          | 2.92798600  | 1.42671900  | 0.94711400  |
| H | -1.73515700 | -2.97520600 | -1.99047700 | C          | 3.97609500  | 2.10774100  | 0.06624700  |
| C | -0.83354300 | -3.11232800 | -0.00463400 | C          | 3.52078100  | 1.11688300  | 2.32305900  |
| C | -3.23469000 | 0.37765600  | -1.36551700 | C          | 5.12967300  | 1.14106400  | -0.24579400 |
| H | -4.19558600 | 0.30426300  | -1.88094100 | H          | 3.51308800  | 2.48568100  | -0.85136500 |
| H | -2.50661100 | -0.22845300 | -1.91398200 | C          | 4.99864200  | 0.70042700  | 2.22311900  |
| C | -4.23516000 | -0.63817900 | 1.93964400  | H          | 3.44679800  | 2.00281700  | 2.96513700  |
| H | -4.84319500 | -0.79530700 | 2.81630900  | C          | 5.32059400  | 0.09817400  | 0.86255400  |
| C | -1.13320300 | 3.45751600  | -0.63054800 | H          | 4.95304400  | 0.63756100  | -1.20509200 |
| H | -0.09365100 | 3.69359400  | -0.41371300 | H          | 5.25134300  | 0.00884200  | 3.03196200  |
| C | 2.62441900  | -1.16741100 | -1.86009700 | H          | 4.66324500  | -0.76805300 | 0.68888300  |
| H | 3.36946200  | -0.99757300 | -1.07044900 | H          | 6.05342900  | 1.71391900  | -0.37807600 |
| C | -4.55860000 | -0.21095300 | 0.69595100  | H          | 6.33970400  | -0.29884300 | 0.84065900  |
| H | -5.50265300 | 0.09409600  | 0.27238000  | H          | 5.63789500  | 1.57978400  | 2.37213300  |
| C | 0.33295200  | -2.82690600 | 0.76097500  | H          | 2.92070900  | 0.33549800  | 2.80902000  |
| H | 0.37349100  | -3.12652900 | 1.80361100  | H          | 4.34450700  | 2.99140700  | 0.60379400  |
| C | 2.34829300  | 0.17220300  | -2.53272100 | H          | 2.66360500  | 0.47210600  | 0.45725800  |
| H | 1.55859700  | 0.09252700  | -3.29046700 | <b>TS6</b> |             |             |             |
| H | 3.24088100  | 0.53459800  | -3.05132200 | 1 1        |             |             |             |
| H | 2.06362000  | 0.94061500  | -1.80590500 | Ru         | -0.36953600 | -0.93513400 | -0.04782900 |
| C | -3.75952300 | 2.82793600  | -1.25156700 | N          | -0.22896900 | 1.17400600  | -0.60281600 |
| H | -4.78993400 | 2.57445300  | -1.49274300 | H          | 0.49799800  | 1.59524300  | 0.26261100  |
| C | -2.14297600 | -1.31760900 | 3.11365900  | N          | -3.28135700 | -0.11085800 | -0.13955600 |
| H | -2.54610000 | -2.26289300 | 3.48637900  | N          | -2.87499300 | -0.91569400 | 1.81086500  |
| H | -2.21906600 | -0.56562000 | 3.90249900  | C          | -1.23819600 | 2.20400700  | -0.74787900 |
| H | -1.09560900 | -1.44110200 | 2.83880000  | C          | 1.52490400  | -2.24003900 | -0.01734200 |
| C | -2.09819900 | 4.45986700  | -0.66041500 | H          | 2.43469000  | -2.09831800 | 0.56202200  |
| H | -1.81443900 | 5.48562500  | -0.44668100 | C          | 1.45741200  | -1.70704700 | -1.31768500 |
| C | 3.21530700  | -2.16641200 | -2.85588700 | C          | 0.21572200  | -1.83518700 | -2.02021000 |
| H | 3.43532300  | -3.12761700 | -2.38402700 | H          | 0.10782400  | -1.38148000 | -3.00276600 |
| H | 4.14445000  | -1.77882200 | -3.28304200 | C          | -2.27583600 | -0.60860900 | 0.62583300  |
| H | 2.52407200  | -2.35257700 | -3.68533000 | C          | -2.54672800 | 1.94968000  | -1.19193100 |
| C | -1.99367900 | -3.83134400 | 0.60360000  | C          | -0.86768600 | -2.55823700 | -1.47546800 |
| H | -1.99697500 | -3.73803700 | 1.69188400  | H          | -1.79523700 | -2.65173900 | -2.03424200 |
| H | -1.94229500 | -4.89894700 | 0.36607200  | C          | -0.78103000 | -3.12075700 | -0.16017500 |
| H | -2.94771200 | -3.45528400 | 0.22272200  | C          | -3.03371300 | 0.55163400  | -1.42401400 |
| C | -3.41505200 | 4.14811700  | -0.98180400 | H          | -3.97019600 | 0.54793500  | -1.98727800 |
| H | -4.17038100 | 4.92634000  | -1.02123300 | H          | -2.30471900 | -0.06011800 | -1.96335800 |
| H | -0.08551100 | -0.12151000 | 1.34445000  | C          | -4.22245400 | -0.59451800 | 1.78163200  |
| H | -0.17807900 | 0.94151200  | -1.87781600 | H          | -4.86990400 | -0.76776500 | 2.62647200  |
| C | 1.11359400  | 2.59012600  | 1.95958400  | C          | -0.86723100 | 3.51788200  | -0.44304000 |
| H | 1.50485700  | 2.45289600  | 2.97460600  | H          | 0.13942500  | 3.70733000  | -0.07972800 |

|   |             |             |             |             |             |             |             |
|---|-------------|-------------|-------------|-------------|-------------|-------------|-------------|
| C | 2.67813700  | -1.10499900 | -1.97499900 | H           | 4.81656500  | -0.41425200 | 0.53388900  |
| H | 3.43171700  | -0.96616700 | -1.18558200 | H           | 5.41780100  | 2.45931800  | -0.21699100 |
| C | -4.47496200 | -0.07566600 | 0.55511500  | H           | 6.30773300  | 0.48154600  | 0.71874400  |
| H | -5.38385600 | 0.30918800  | 0.12007900  | H           | 5.17108600  | 1.85144900  | 2.54425800  |
| C | 0.41486500  | -2.91618900 | 0.57388300  | H           | 3.03176200  | -0.29077200 | 2.67430200  |
| H | 0.49131500  | -3.29980200 | 1.58729300  | H           | 3.57553900  | 3.09677800  | 1.12397900  |
| C | 2.43219000  | 0.25123200  | -2.62451900 | H           | 2.44024500  | 0.34107300  | 0.51083300  |
| H | 1.60378700  | 0.22458600  | -3.34223000 | <b>IM12</b> |             |             |             |
| H | 3.31671800  | 0.57477200  | -3.17967400 | l l         |             |             |             |
| H | 2.23018700  | 1.02434000  | -1.87563400 | Ru          | -0.56776900 | -1.32817400 | -0.35171800 |
| C | -3.43932800 | 3.01467800  | -1.32881600 | N           | -0.48334300 | 0.32517000  | -1.44488900 |
| H | -4.45071100 | 2.80790900  | -1.67446300 | H           | 0.74765100  | 3.62125200  | 0.17344700  |
| C | -2.21053500 | -1.47918100 | 2.96938300  | N           | -3.10979400 | 0.15392400  | 0.45846500  |
| H | -2.71923200 | -2.39077900 | 3.29161500  | N           | -2.03799700 | -0.30837100 | 2.25860600  |
| H | -2.20895000 | -0.76335900 | 3.79533200  | C           | -1.15391100 | 1.51918700  | -1.60027600 |
| H | -1.18024800 | -1.71284000 | 2.69603200  | C           | 1.25554600  | -2.15213800 | 0.48634100  |
| C | -1.76949300 | 4.56665300  | -0.58465400 | H           | 1.95774800  | -1.60917400 | 1.11837200  |
| H | -1.45767100 | 5.57782800  | -0.34152900 | C           | 1.46523900  | -2.17105300 | -0.93628500 |
| C | 3.23104000  | -2.10623200 | -2.99239600 | C           | 0.47724700  | -2.79350700 | -1.71661300 |
| H | 3.42683500  | -3.08135900 | -2.53871600 | H           | 0.52259000  | -2.72511300 | -2.79854600 |
| H | 4.16707900  | -1.73882400 | -3.42072600 | C           | -1.97874000 | -0.45813400 | 0.90213700  |
| H | 2.52602000  | -2.25702300 | -3.81721900 | C           | -2.55064700 | 1.63016000  | -1.38389100 |
| C | -1.93113200 | -3.88106500 | 0.41275200  | C           | -0.68072300 | -3.38407000 | -1.11523500 |
| H | -1.88359100 | -3.92546400 | 1.50311700  | H           | -1.46886000 | -3.77516900 | -1.75179200 |
| H | -1.91962900 | -4.91227900 | 0.04491100  | C           | -0.79721500 | -3.51588200 | 0.29491100  |
| H | -2.89088600 | -3.44302700 | 0.12329300  | C           | -3.33358600 | 0.43211200  | -0.96143400 |
| C | -3.06108200 | 4.31944800  | -1.03668800 | H           | -4.40601000 | 0.57554900  | -1.11255400 |
| H | -3.76962300 | 5.13258900  | -1.15677000 | H           | -3.01970500 | -0.46569200 | -1.51009100 |
| H | 0.06394700  | -0.07993900 | 1.54202400  | C           | -3.17120300 | 0.38845700  | 2.63362400  |
| H | 0.32885300  | 1.19158700  | -1.45566300 | H           | -3.39514500 | 0.60217700  | 3.66664400  |
| C | 0.43921500  | 0.90209500  | 2.21334900  | C           | -0.45092800 | 2.66048200  | -2.04374000 |
| H | 0.90167500  | 0.36422300  | 3.05107100  | H           | 0.61839900  | 2.56845600  | -2.23202600 |
| H | -0.52733700 | 1.33883100  | 2.49104000  | C           | 2.64378200  | -1.42679100 | -1.51334600 |
| N | 1.21102300  | 1.72550000  | 1.45055300  | H           | 2.65144900  | -0.44486200 | -1.01078000 |
| C | 2.55001100  | 1.22441300  | 1.18933900  | C           | -3.84494900 | 0.68726300  | 1.49521500  |
| C | 3.36900100  | 2.26598700  | 0.43762800  | H           | -4.77253600 | 1.21410000  | 1.33521200  |
| C | 3.31011200  | 0.74658100  | 2.44347900  | C           | 0.19428300  | -2.88702800 | 1.08316700  |
| C | 4.67422300  | 1.66421600  | -0.09904500 | H           | 0.09049900  | -2.89163000 | 2.16232200  |
| H | 2.77071300  | 2.69828600  | -0.37517100 | C           | 2.55898200  | -1.19789100 | -3.01509900 |
| C | 4.82951500  | 0.84509300  | 2.27048100  | H           | 2.62327000  | -2.14131500 | -3.56784900 |
| H | 2.98489500  | 1.35161600  | 3.29904900  | H           | 3.39161500  | -0.57380900 | -3.34869200 |
| C | 5.22261300  | 0.56738800  | 0.82634900  | H           | 1.63058900  | -0.70302300 | -3.32154800 |
| H | 4.51706600  | 1.25430300  | -1.10486600 | C           | -3.17698400 | 2.86027900  | -1.57434700 |
| H | 5.33268000  | 0.16024400  | 2.95960400  | H           | -4.25116800 | 2.93087800  | -1.41516800 |

---

|   |             |             |             |   |             |             |             |
|---|-------------|-------------|-------------|---|-------------|-------------|-------------|
| C | -0.99379000 | -0.67070400 | 3.19619600  | H | -1.11179000 | 3.41455400  | 1.51765600  |
| H | -1.16214500 | -1.66364900 | 3.62234500  | N | 0.92406900  | 3.20803700  | 1.08403900  |
| H | -0.97283000 | 0.05832100  | 4.00768400  | C | 1.97564800  | 2.21163300  | 0.95058000  |
| H | -0.03151700 | -0.64379500 | 2.68110900  | C | 3.18423700  | 2.81827500  | 0.25168500  |
| C | -1.09263200 | 3.87369500  | -2.22230300 | C | 2.38128900  | 1.67682800  | 2.33931500  |
| H | -0.52655900 | 4.73850400  | -2.55514700 | C | 4.25699300  | 1.76216700  | -0.02685500 |
| C | 3.94581000  | -2.14284700 | -1.14714200 | H | 2.87917800  | 3.31108900  | -0.68025900 |
| H | 4.03645200  | -2.30755300 | -0.06940600 | C | 3.86605100  | 1.31136200  | 2.42178400  |
| H | 4.80801000  | -1.54917500 | -1.46376700 | H | 2.13754200  | 2.44481400  | 3.08293600  |
| H | 4.00707800  | -3.11705700 | -1.64240600 | C | 4.34465900  | 0.72218900  | 1.10235900  |
| C | -1.97471100 | -4.18777900 | 0.91818900  | H | 4.05109500  | 1.25991900  | -0.98321800 |
| H | -2.23527300 | -3.73373300 | 1.87764600  | H | 4.04234300  | 0.61812700  | 3.25036500  |
| H | -1.75868300 | -5.24526400 | 1.10262400  | H | 3.70937500  | -0.14487400 | 0.86349600  |
| H | -2.85196400 | -4.14067600 | 0.26929600  | H | 5.22558500  | 2.25556300  | -0.15825300 |
| C | -2.46406900 | 3.98270800  | -1.98117200 | H | 5.36241600  | 0.32746500  | 1.18556900  |
| H | -2.97292200 | 4.92955100  | -2.12803400 | H | 4.45864400  | 2.20591700  | 2.65106400  |
| H | -0.65137100 | 1.75105900  | 1.06691300  | H | 1.76970600  | 0.79645100  | 2.58820700  |
| H | 0.39200800  | 0.37702200  | -1.96365000 | H | 3.58053400  | 3.61547500  | 0.89255100  |
| C | -0.31721300 | 2.66643300  | 1.59318600  | H | 1.62677600  | 1.34115600  | 0.33819100  |
| H | -0.21157800 | 2.41404700  | 2.65588200  |   |             |             |             |

---

## VI. References

- 1 E. Jansen, L. S. Jongbloed, D. S. Tromp, M. Lutz, B. de Bruin, C. J. Elsevier, Ligand Effects on the Hydrogenation of Biomass-Inspired Substrates with Bifunctional Ru, Ir, and Rh Complexes, *ChemSusChem*, 2013, **6**, 1737-1744.
- 2 H. Ohara, W. W. N. O, A. J. Lough, R. H. Morris, Effect of chelating ring size in catalytic ketone hydrogenation: facile synthesis of ruthenium(ii) precatalysts containing an N-heterocyclic carbene with a primary amine donor for ketone hydrogenation and a DFT study of mechanisms, *Dalton Trans.*, 2012, **41**, 8797-8808.
- 3 B. Y. Tay, C. Wang, P. H. Phua, L. P. Stubbs, H. V. Huynh, Selective hydrogenation of levulinic acid to  $\gamma$ -valerolactone using in situ generated ruthenium nanoparticles derived from Ru–NHC complexes, *Dalton Trans.*, 2016, **45**, 3558-3563.
- 4 F. E. Fernández, M. C. Puerta, P. Valerga, Ruthenium(II) Picolyl-NHC Complexes: Synthesis, Characterization, and Catalytic Activity in Amine N-alkylation and Transfer Hydrogenation Reactions, *Organometallics*, 2012, **31**, 6868-6879.
- 5 Z.-Q. Wang, X.-S. Tang, Z.-Q. Yang, B.-Y. Yu, H.-J. Wang, W. Sang, Y. Yuan, C. Chen, F. Verpoort, Highly active bidentate N-heterocyclic carbene/ruthenium complexes performing dehydrogenative coupling of alcohols and hydroxides in open air, *Chem. Commun.*, 2019, **55**, 8591-8594.
- 6 P. Bhunia, E. Hwang, M. Min, J. Lee, S. Seo, S. Some, H. Lee, A non-volatile memory device consisting of graphene oxide covalently functionalized with ionic liquid, *Chem. Commun.*, 2012, **48**, 913-915.
- 7 R. N. Patra, R. L. Gardas, Effect of Nitro Groups on Desulfurization Efficiency of Benzyl-Substituted Imidazolium-Based Ionic Liquids: Experimental and Computational Approach, *Energy Fuels*, 2019, **33**, 7659-7666.
- 8 Đ. Škalamera, V. Blažek Bregović, I. Antol, C. Bohne, N. Basarić, Hydroxymethylaniline Photocages for Carboxylic Acids and Alcohols, *J. Org. Chem.*, 2017, **82**, 12554-12568.
- 9 A. Millet, D. Dailier, P. Larini, O. Baudoin, Ligand-controlled  $\alpha$ - and  $\beta$ -arylation of acyclic N-Boc amines, *Angew. Chem. Int. Ed.*, 2014, **53**, 2678-2682.
- 10 K. Tars, J. Leitans, A. Kazaks, D. Zelencova, E. Liepinsh, J. Kuka, M. Makrečka, D. Lola, V. Andrianovs, D. Gustina, S. Grinberga, E. Liepinsh, I. Kalvinsh, M. Dambrova, E. Loza, O. Pugovics, Targeting Carnitine Biosynthesis: Discovery of New Inhibitors against  $\gamma$ -Butyrobetaine Hydroxylase, *J. Med. Chem.*, 2014, **57**, 2213-2236.
- 11 G. Choi, S. H. Hong, Selective Monomethylation of Amines with Methanol as the C1 Source, *Angew. Chem. Int. Ed.*, 2018, **57**, 6166-6170.
- 12 C. Bosset, H. Beucher, G. Bretel, E. Pasquier, L. Queguiner, C. Henry, A. Vos, J. P. Edwards, L. Meerpoel, D. Berthelot, Minisci-Photoredox-Mediated  $\alpha$ -Heteroarylation of N-Protected Secondary Amines: Remarkable Selectivity of Azetidines, *Org. Lett.*, 2018, **20**, 6003-6006.

- 
- 13 T. Ikeda, Z. Zhang, Y. Motoyama, Hydrosilane - Promoted Facile Deprotection of tert - Butyl Groups in Esters, Ethers, Carbonates, and Carbamates, *Adv. Synth. Catal.*, 2018, **361**, 673-677.
- 14 S. Yoshida, K. Igawa, K. Tomooka, Nucleophilic substitution reaction at the nitrogen of arylsulfonamides with phosphide anion, *J. Am. Chem. Soc.*, 2012, **134**, 19358-19361.
- 15 X. Zhang, Y. Shen, T. Rovis, Photoinduced Nickel-Catalyzed Selective N-Demethylation of Trialkylamines Using C(sp<sup>2</sup>)-Bromides as HAT Reagents, *J. Am. Chem. Soc.*, 2023, **145**, 3294-3300.
- 16 K. Nishiwaki, T. Ogawa, K. Shigeta, K. Takahashi, K. Matsuo, Formation of benzylamines from triazene compounds via a 1,2-proton shift, *Tetrahedron*, 2006, **62**, 7034-7042.
- 17 A. Kišić, M. Stephan, B. Mohar, Asymmetric Transfer Hydrogenation of 1-Naphthyl Ketones by an ansa-Ru(II) Complex of a DPEN-SO<sub>2</sub>N(Me)-(CH<sub>2</sub>)<sub>2</sub>(η<sup>6</sup>-p-Tol) Combined Ligand, *Org. Lett.*, 2013, **15**, 1614-1617.
- 18 H. Lee, T. He, S. P. Cook, Iron-Catalyzed, Directed Benzylic Borylation, *Org. Lett.*, 2023, **25**, 1-4.
- 19 M. Huang, Y. Li, Y. Li, J. Liu, S. Shu, Y. Liu, Z. Ke, Room temperature N-heterocyclic carbene manganese catalyzed selective N-alkylation of anilines with alcohols, *Chem. Commun.*, 2019, **55**, 6213-6216.
- 20 B. Paul, S. Shee, K. Chakrabarti, S. Kundu, Tandem Transformation of Nitro Compounds into N-Methylated Amines: Greener Strategy for the Utilization of Methanol as a Methylating Agent, *ChemSusChem*, 2017, **10**, 2370-2374.
- 21 N. Biswas, D. Srimani, Ru-Catalyzed Selective Catalytic Methylation and Methylenation Reaction Employing Methanol as the C1 Source, *J. Org. Chem.*, 2021, **86**, 10544-10554.
- 22 D. Wei, O. Sadek, V. Dorcet, T. Roisnel, C. Darcel, E. Gras, E. Clot, J.-B. Sortais, Selective mono N-methylation of anilines with methanol catalyzed by rhenium complexes: An experimental and theoretical study, *J. Catal.*, 2018, **366**, 300-309.
- 23 M. Huang, Y. Li, X. B. Lan, J. Liu, C. Zhao, Y. Liu, Z. Ke, Ruthenium(II) complexes with N-heterocyclic carbene-phosphine ligands for the N-alkylation of amines with alcohols, *Org. Biomol. Chem.*, 2021, **19**, 3451-3461.
- 24 V. Goyal, J. Gahtori, A. Narani, P. Gupta, A. Bordoloi, K. Natte, Commercial Pd/C-Catalyzed N-Methylation of Nitroarenes and Amines Using Methanol as Both C1 and H<sub>2</sub> Source, *J. Org. Chem.*, 2019, **84**, 15389-15398.
- 25 F. Pan, B. Wu, Z.-J. Shi, Cu-Catalyzed Intramolecular Amidation of Unactivated C(sp<sup>3</sup>)-H Bonds To Synthesize N-Substituted Indolines, 2016, **22**, 6487-6490.
- 26 S. Huang, X. Hong, H.-Z. Cui, B. Zhan, Z.-M. Li, X.-F. Hou, Bimetallic Bis-NHC-Ir(III) Complex Bearing 2-Arylbenzo[d]oxazolyl Ligand: Synthesis, Catalysis, and Bimetallic Effects, *Organometallics*, 2020, **39**, 3514-3523.
- 27 R. Liang, S. Li, R. Wang, L. Lu, F. Li, N-Methylation of Amines with Methanol Catalyzed by a Cp\*Ir Complex Bearing a Functional 2,2'-Bibenzimidazole Ligand,

- 
- Org. Lett.*, 2017, **19**, 5790-5793.
- 28 T. T. Dang, B. Ramalingam, A. M. Seayad, Efficient Ruthenium-Catalyzed N-Methylation of Amines Using Methanol, *ACS Catal.*, 2015, **5**, 4082-4088.
- 29 S. Michlik, T. Hille, R. Kempe, The Iridium-Catalyzed Synthesis of Symmetrically and Unsymmetrically Alkylated Diamines under Mild Reaction Conditions, *Adv. Synth. Catal.*, 2012, **354**, 847-862.
- 30 G. W. S. M. J. T. Frisch, H. B.; Scuseria, G. E.; Robb, J. R. S. M. A.; Cheeseman, G.; Barone, V.; Mennucci, B.; G. A. N. Petersson, H.; Caricato, M.; Li, X.; Hratchian, H. P.; A. F. B. Izmaylov, J.; Zheng, G.; Sonnenberg, J. L.; Hada, M.; M. T. Ehara, K.; Fukuda, R.; Hasegawa, J.; Ishida, M.; Nakajima, Y. K. T.; Honda, O.; Nakai, H.; Vreven, T.; Montgomery, J. A., Jr.; J. E. O. Peralta, F.; Bearpark, M.; Heyd, J. J.; Brothers, E.; Kudin, V. N. K. K. N.; Staroverov, R.; Normand, J.; Raghavachari, K.; A. B. Rendell, J. C.; Iyengar, S. S.; Tomasi, J.; Cossi, M.; Rega, N.; J. M. K. Millam, M.; Knox, J. E.; Cross, J. B.; Bakken, V.; Adamo, C.; J. G. Jaramillo, R.; Stratmann, R. E.; Yazyev, O.; Austin, A. J.; R. P. Cammi, C.; Ochterski, J. W.; Martin, R. L.; Morokuma, K.; V. G. V. Zakrzewski, G. A.; Salvador, P.; Dannenberg, J. J.; Dapprich, A. D. F. S.; Daniels, O.; Foresman, J. B.; Ortiz, J. V.; Cioslowski, J.; D. J. Fox, in *Gaussian 09*, revision B.01, Gaussian, Inc.: , Wallingford CT, **2009**.
- 31 W. R. Wadt, P. J. Hay, Ab initio effective core potentials for molecular calculations. Potentials for main group elements Na to Bi, *J. Chem. Phys.*, 1985, **82**, 284-298.
- 32 P. T. Cummings, P. A. Monson, Solution of the Ornstein–Zernike equation in the vicinity of the critical point of a simple fluid, *J. Chem. Phys.*, 1985, **82**, 4303-4311.
- 33 P. J. Hay, W. R. Wadt, Ab initio effective core potentials for molecular calculations. Potentials for K to Au including the outermost core orbitals, *J. Chem. Phys.*, 1985, **82**, 299-310.
- 34 R. Ditchfield, W. J. Hehre, J. A. Pople, Self - Consistent Molecular - Orbital Methods. IX. An Extended Gaussian - Type Basis for Molecular - Orbital Studies of Organic Molecules, *J. Chem. Phys.*, 2003, **54**, 724-728.
- 35 V. A. Rassolov, J. A. Pople, M. A. Ratner, T. L. Windus, 6-31G\* basis set for atoms K through Zn, *J. Chem. Phys.*, 1998, **109**, 1223-1229.
- 36 M. M. Francl, W. J. Pietro, W. J. Hehre, J. S. Binkley, M. S. Gordon, D. J. DeFrees, J. A. Pople, Self - consistent molecular orbital methods. XXIII. A polarization - type basis set for second - row elements, *J. Chem. Phys.*, 1982, **77**, 3654-3665.
- 37 A. V. Marenich, C. J. Cramer, D. G. Truhlar, Universal Solvation Model Based on Solute Electron Density and on a Continuum Model of the Solvent Defined by the Bulk Dielectric Constant and Atomic Surface Tensions, *J. Phys. Chem. B*, 2009, **113**, 6378-6396.

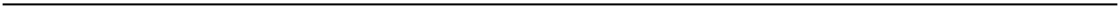



## VII. NMR Spectra

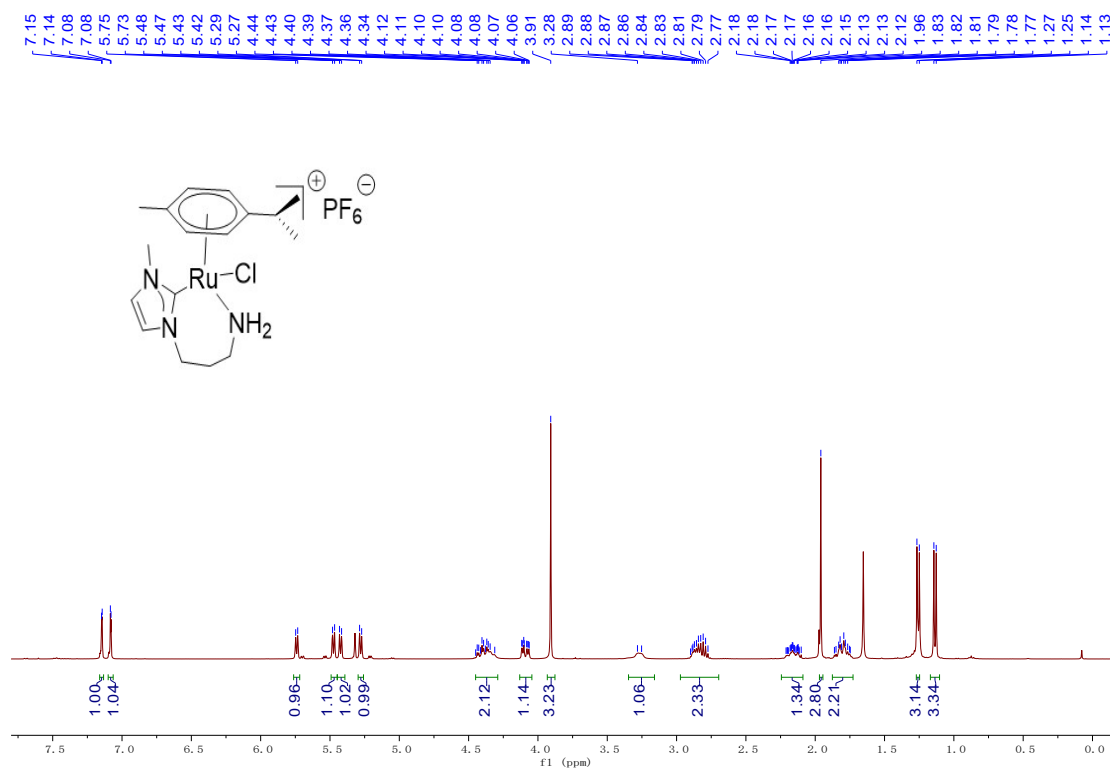

Figure S6: <sup>1</sup>H NMR (400 MHz, Methylene Chloride-*d*<sub>2</sub>, 298 K) spectrum for Ru3

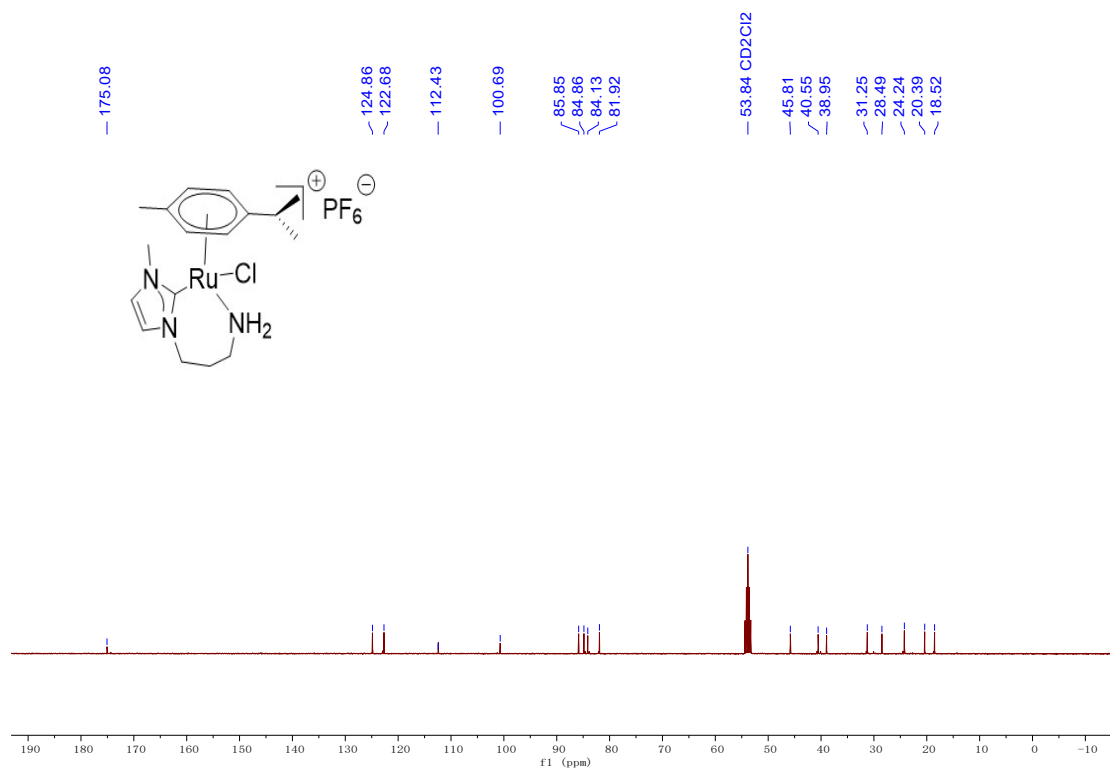

Figure S7: <sup>13</sup>C NMR (101 MHz, Methylene Chloride-*d*<sub>2</sub>, 298 K) spectrum for Ru3

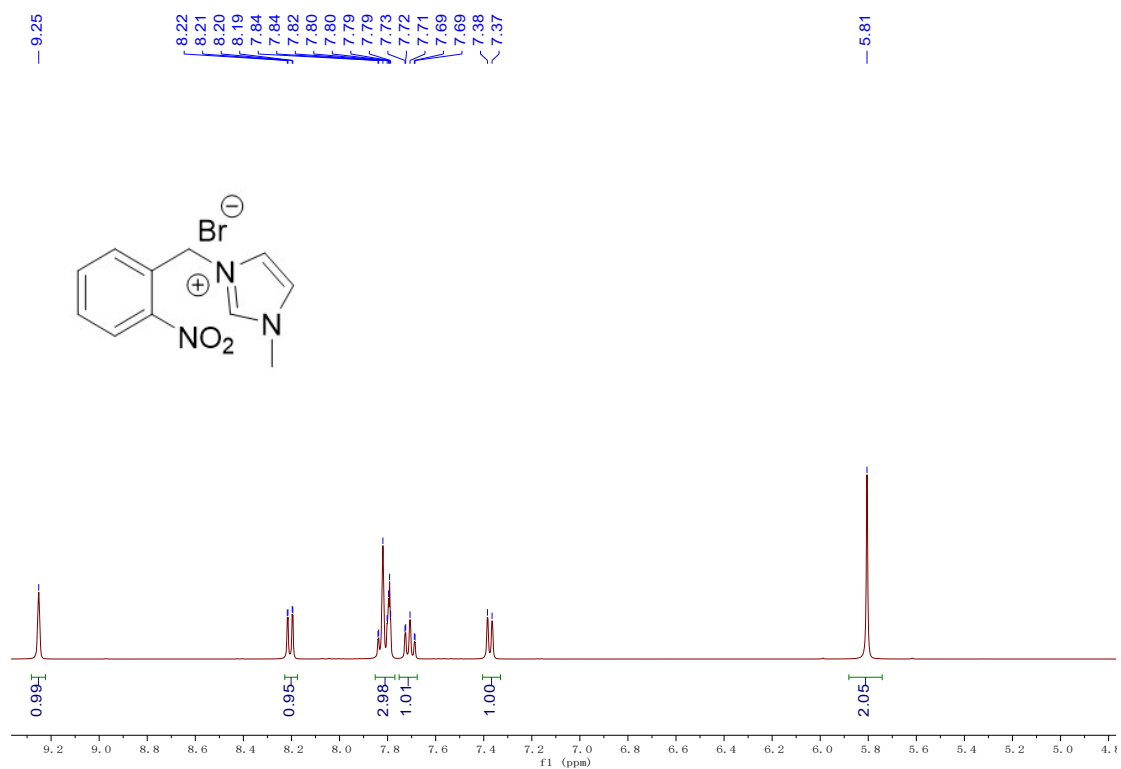

**Figure S8: <sup>1</sup>H NMR (400 MHz, DMSO-d<sub>6</sub>, 298 K) spectrum for 4**

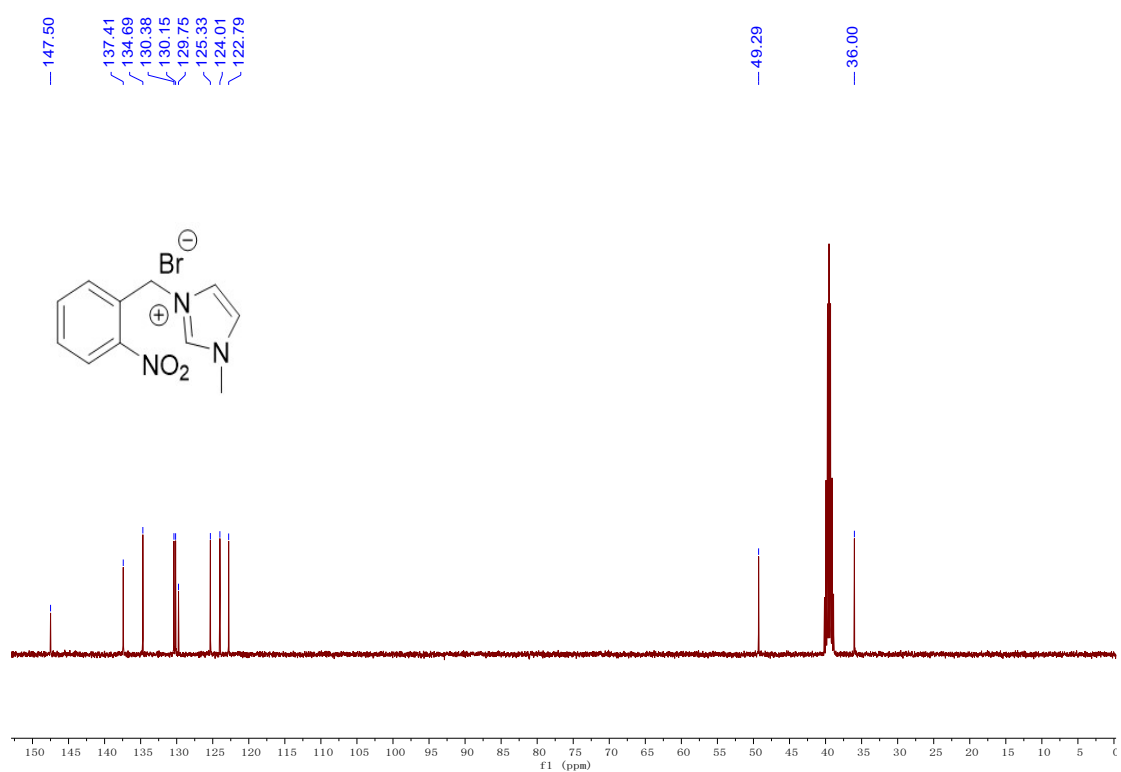

**Figure S9: <sup>13</sup>C NMR (101 MHz, DMSO-d<sub>6</sub>, 298 K) spectrum for 4**

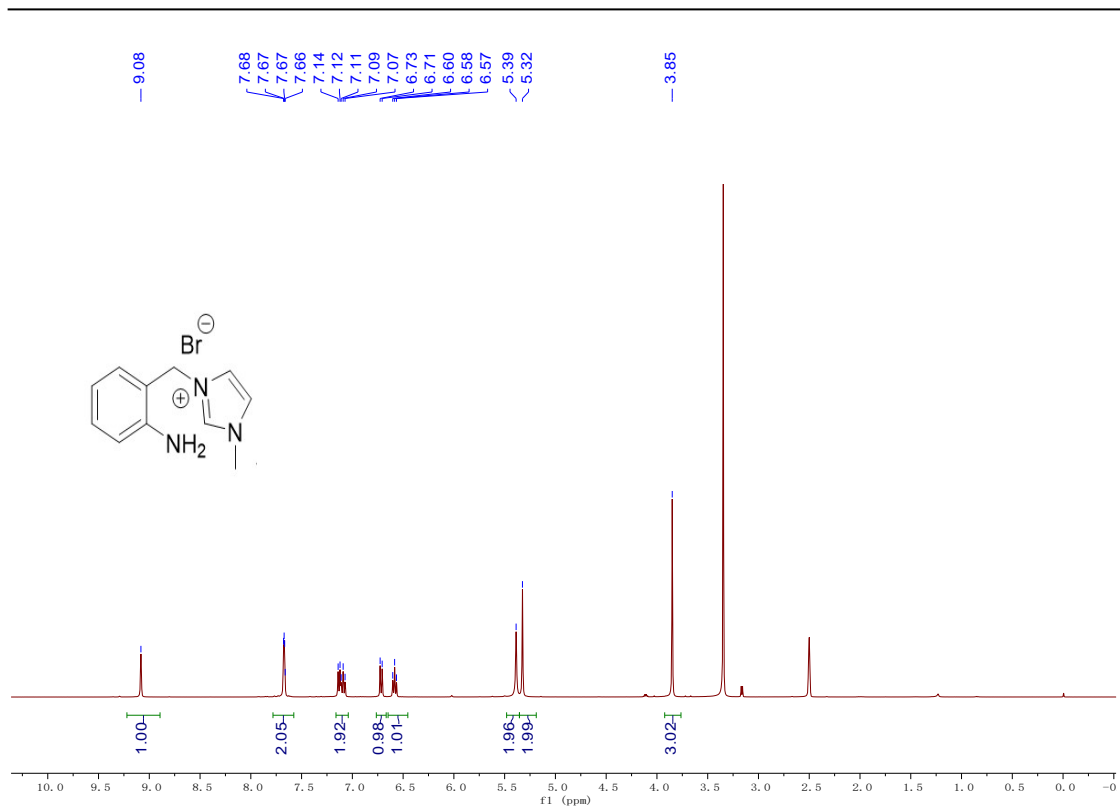

Figure S10: <sup>1</sup>H NMR (400 MHz, DMSO-d<sub>6</sub>, 298 K) spectrum for 5

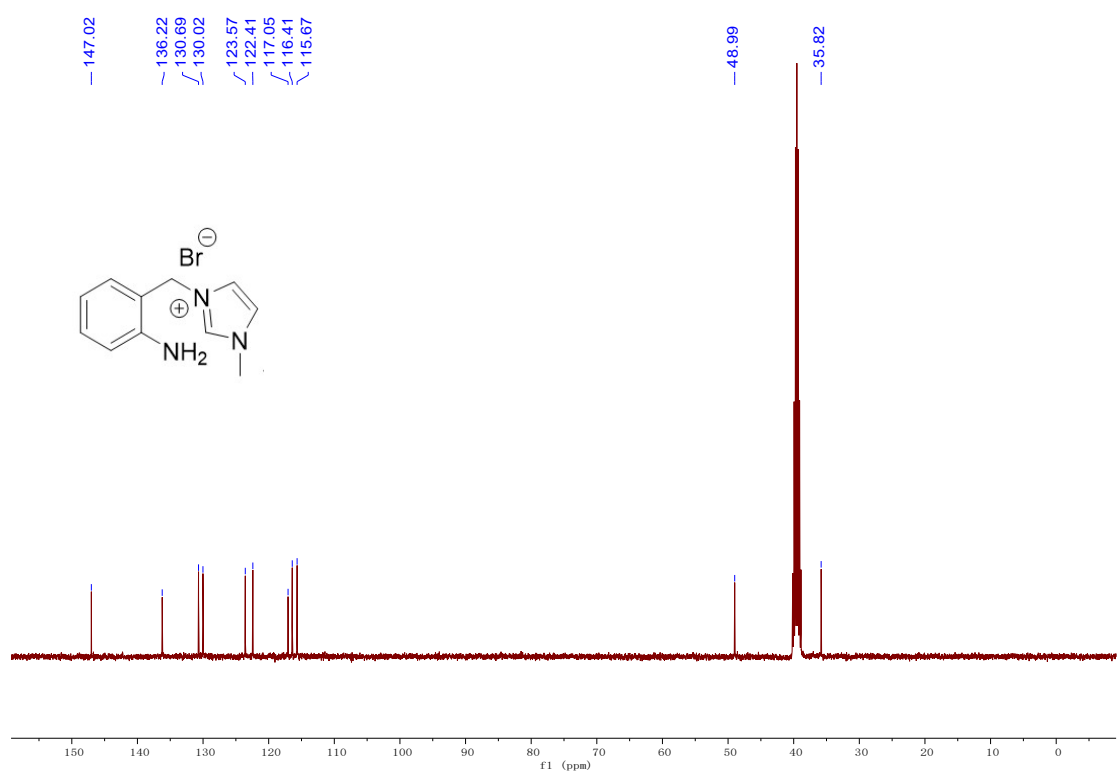

Figure S11: <sup>13</sup>C NMR (101 MHz, DMSO-d<sub>6</sub>, 298 K) spectrum for 5

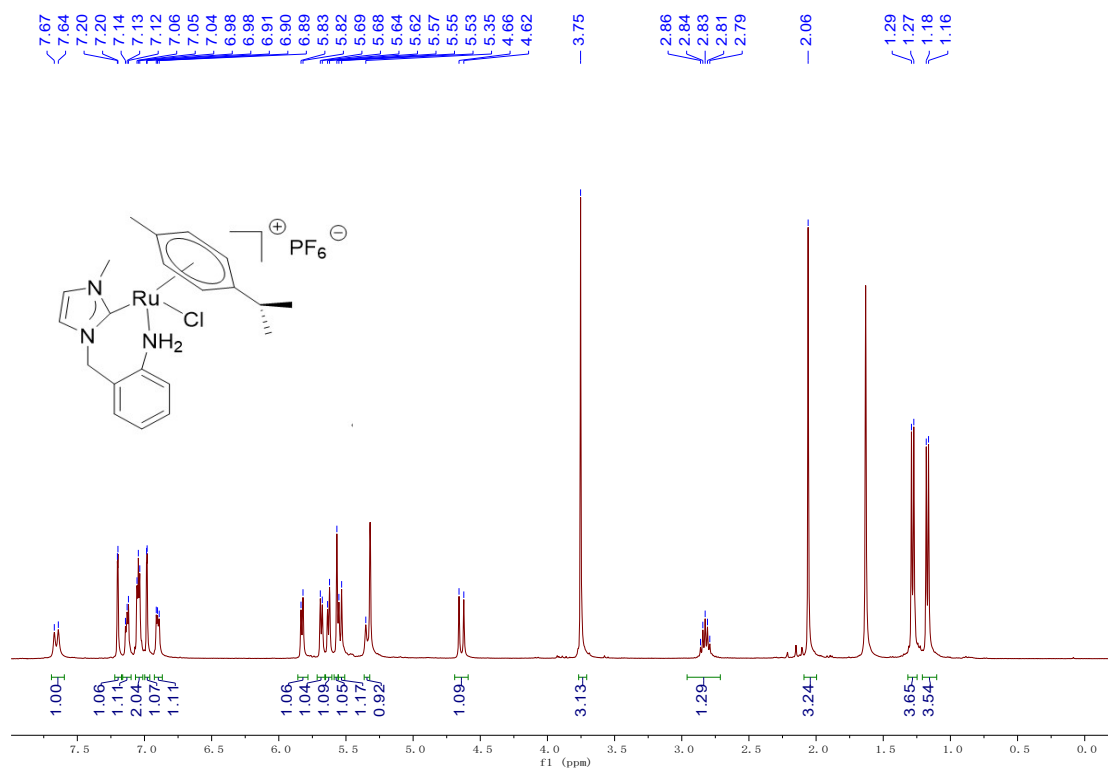

Figure S12: <sup>1</sup>H NMR (400 MHz, Methylene Chloride-*d*<sub>2</sub>, 298 K) spectrum for Ru4

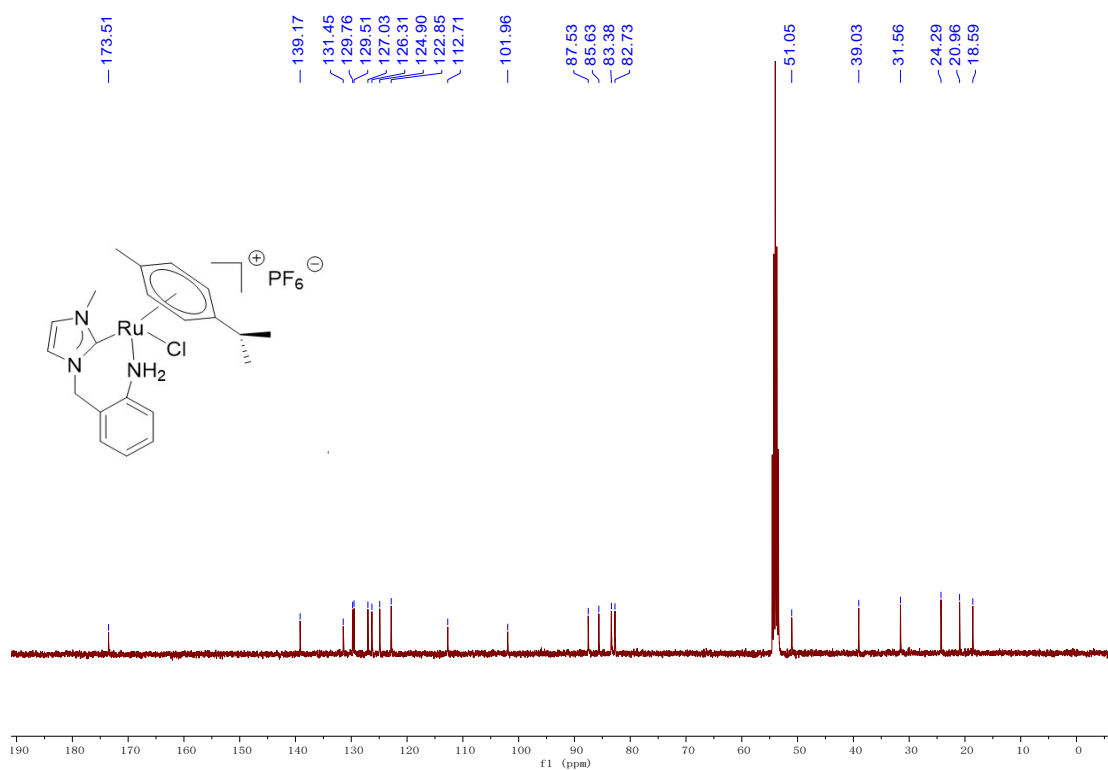

Figure S13: <sup>13</sup>C NMR (101 MHz, Methylene Chloride-*d*<sub>2</sub>, 298 K) spectrum for Ru4

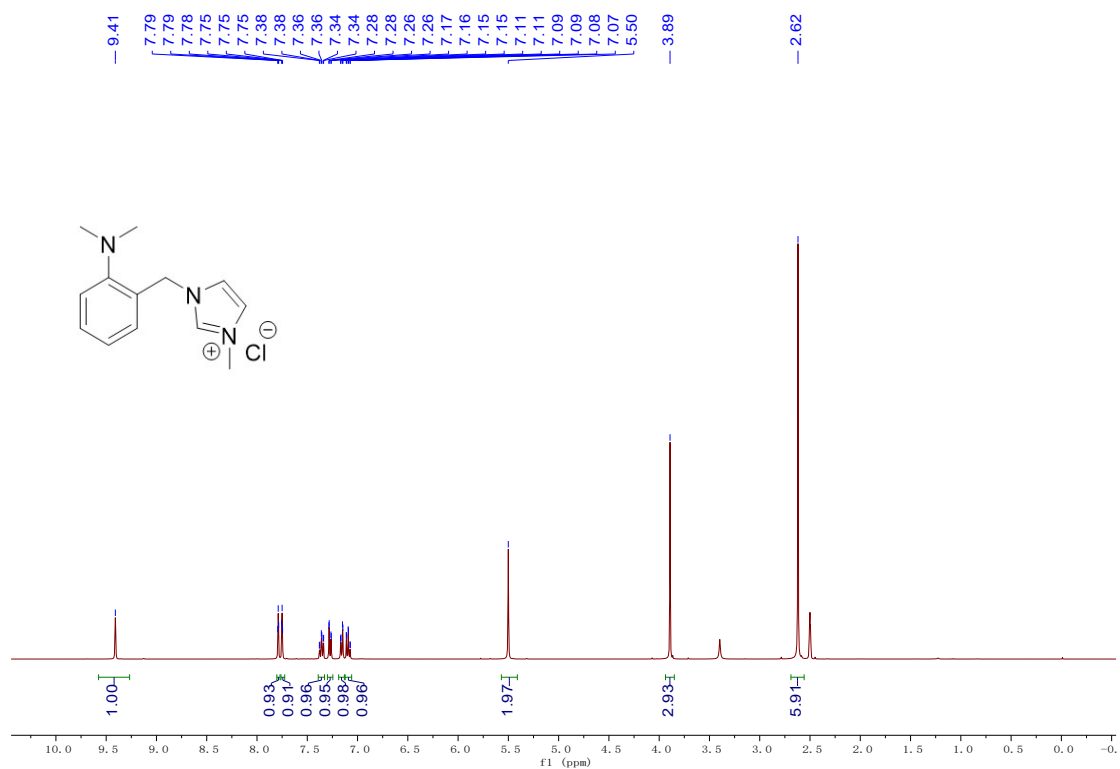

Figure S14: <sup>1</sup>H NMR (400 MHz, DMSO-d<sub>6</sub>, 298 K) spectrum for 15

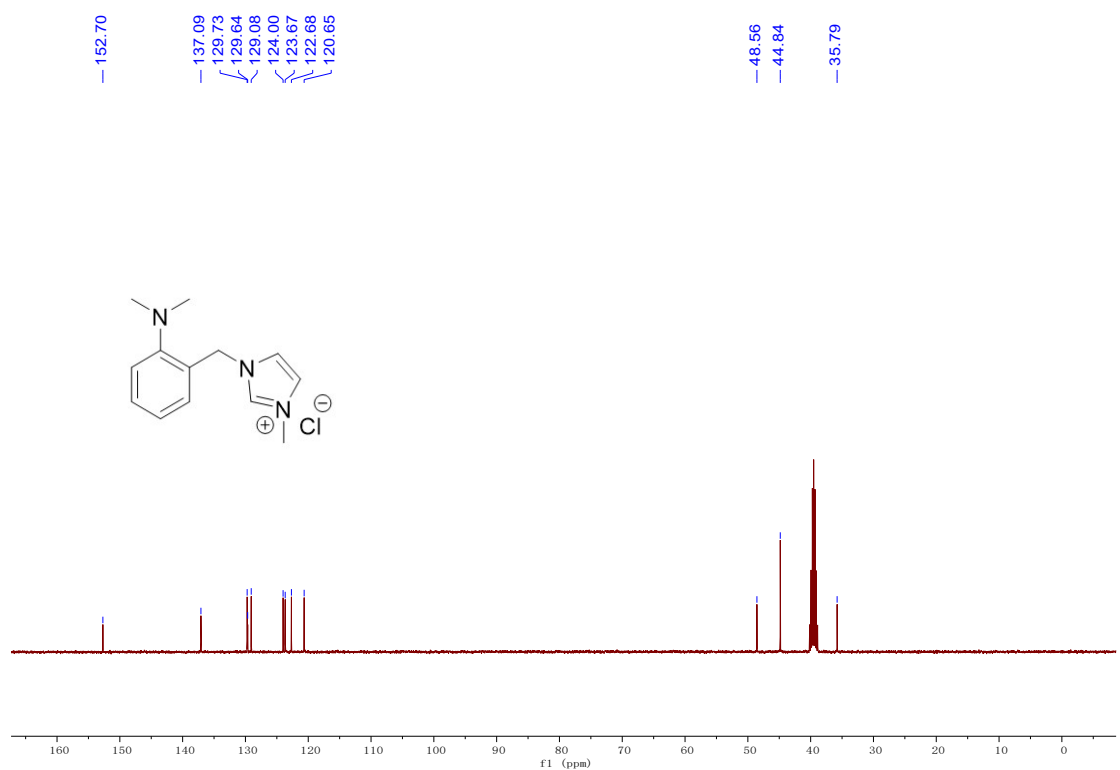

Figure S15: <sup>13</sup>C NMR (101 MHz, DMSO-d<sub>6</sub>, 298 K) spectrum for 15

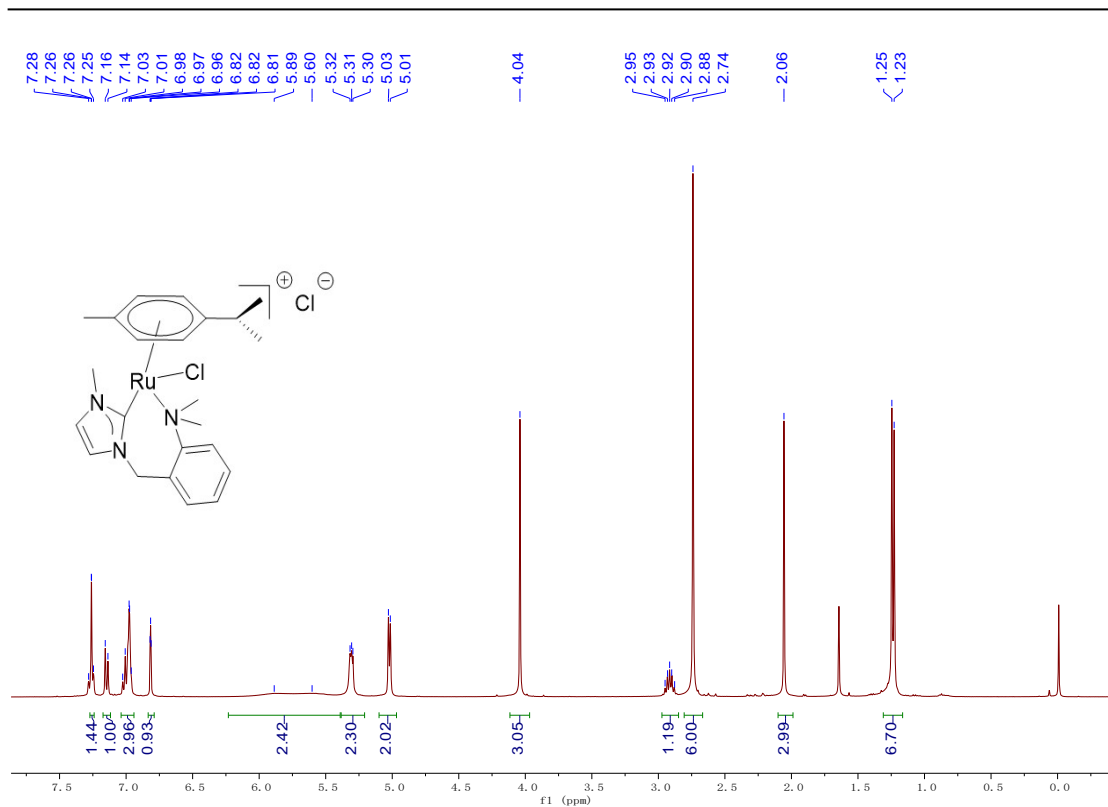

Figure S16: <sup>1</sup>H NMR (400 MHz, CDCl<sub>3</sub>, 298 K) spectrum for Ru4-Me

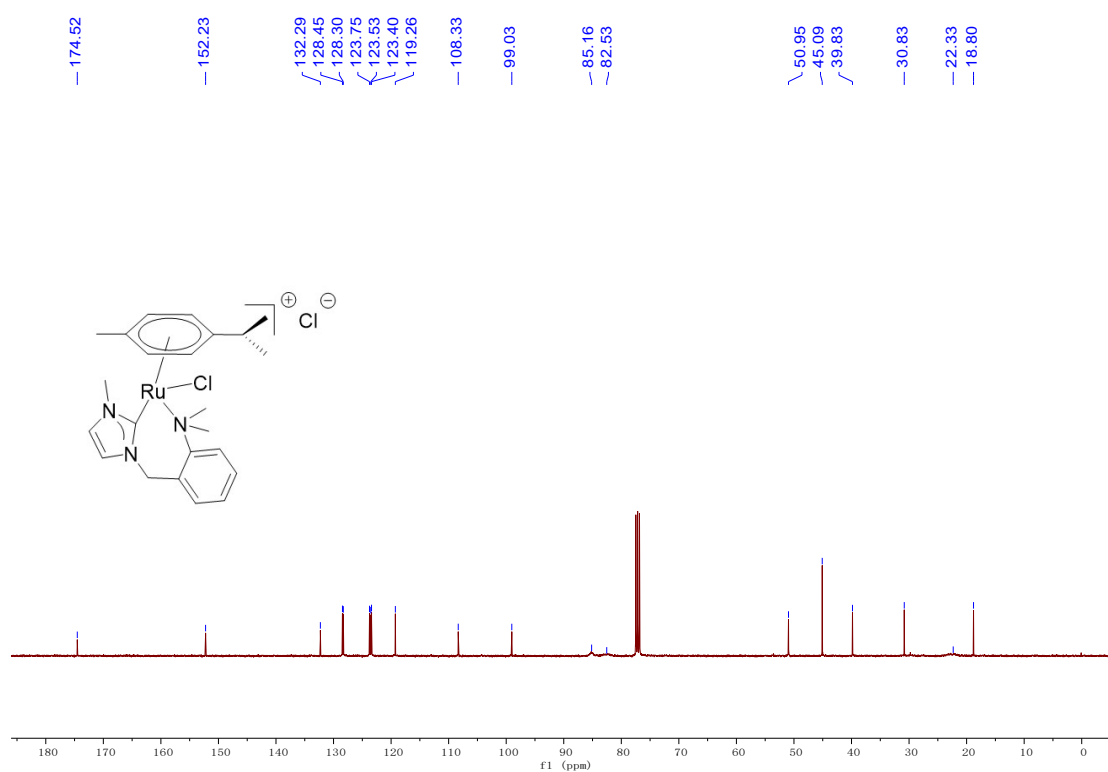

Figure S17: <sup>13</sup>C NMR (101 MHz, CDCl<sub>3</sub>, 298 K) spectrum for Ru4-Me

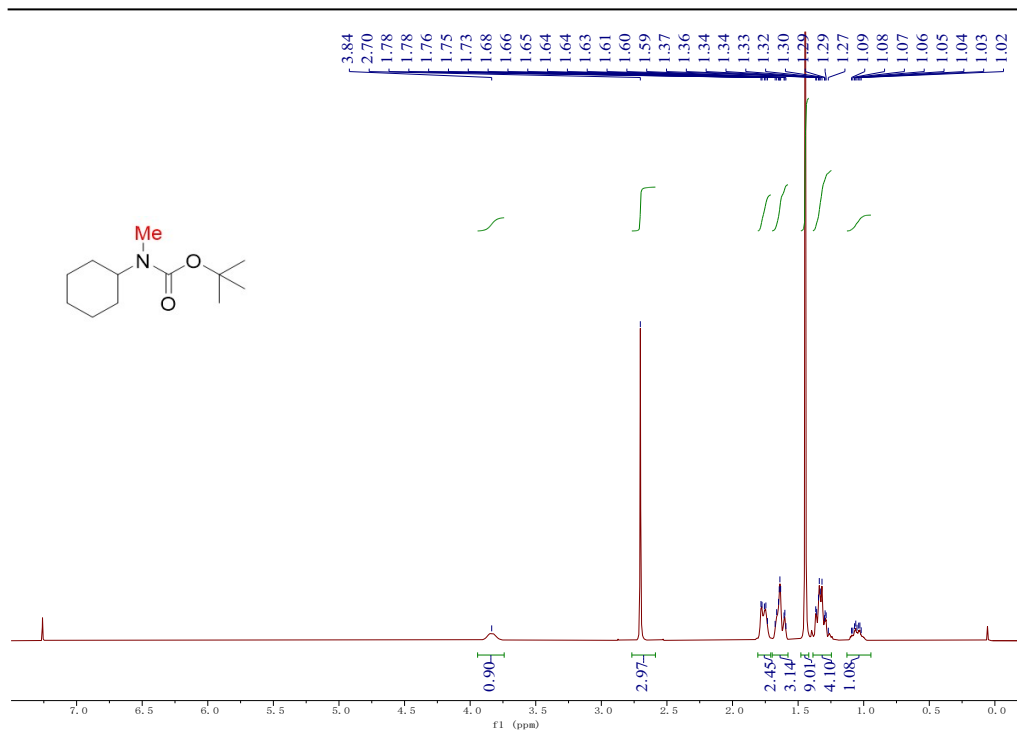

Figure S18: <sup>1</sup>H NMR (400 MHz, CDCl<sub>3</sub>, 298 K) spectrum for 9a

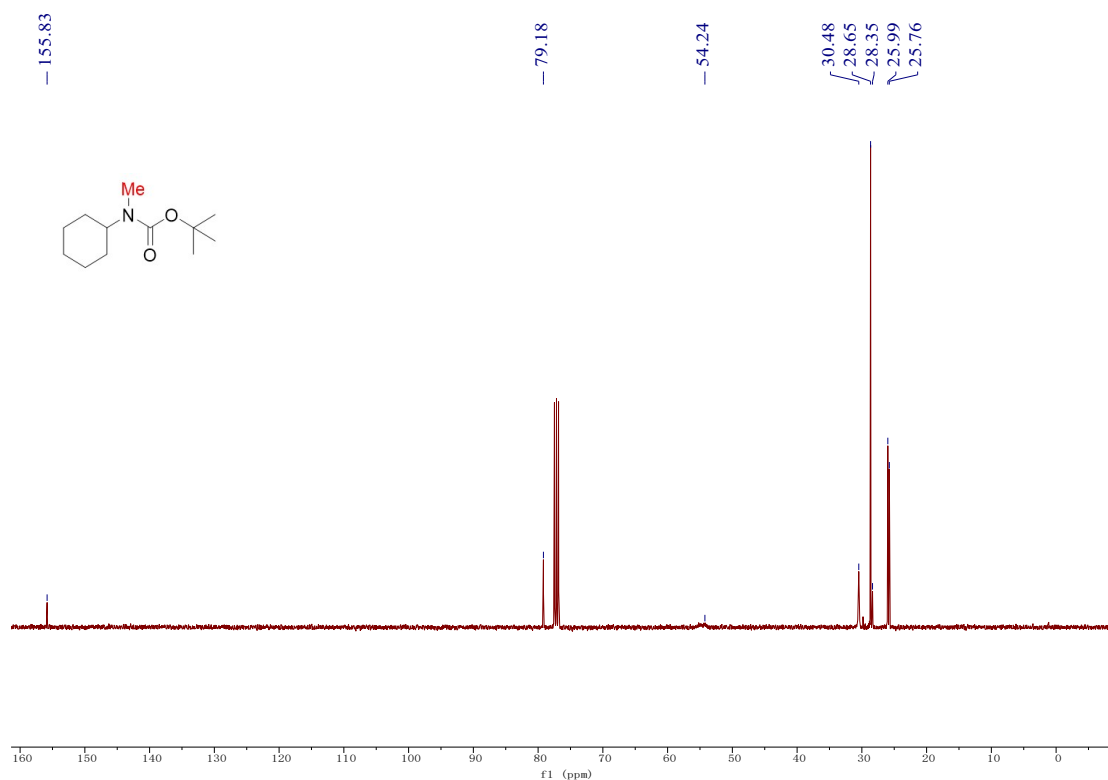

Figure S19: <sup>13</sup>C NMR (101 MHz, CDCl<sub>3</sub>, 298 K) spectrum for 9a

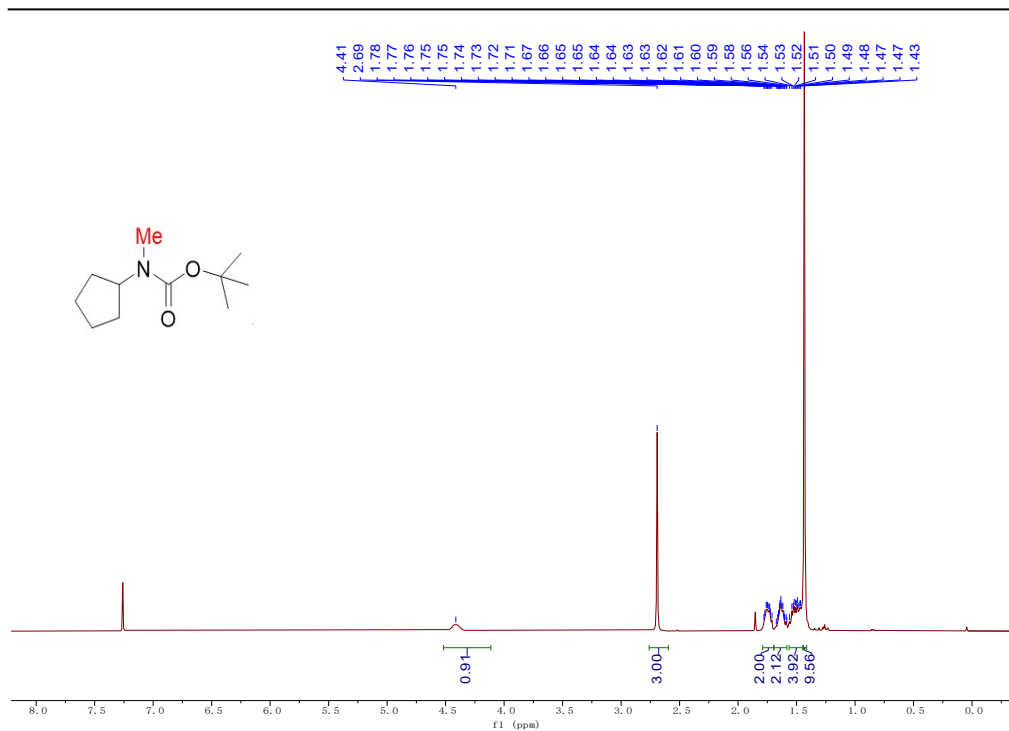

Figure S20: <sup>1</sup>H NMR (400 MHz, CDCl<sub>3</sub>, 298 K) spectrum for 9b

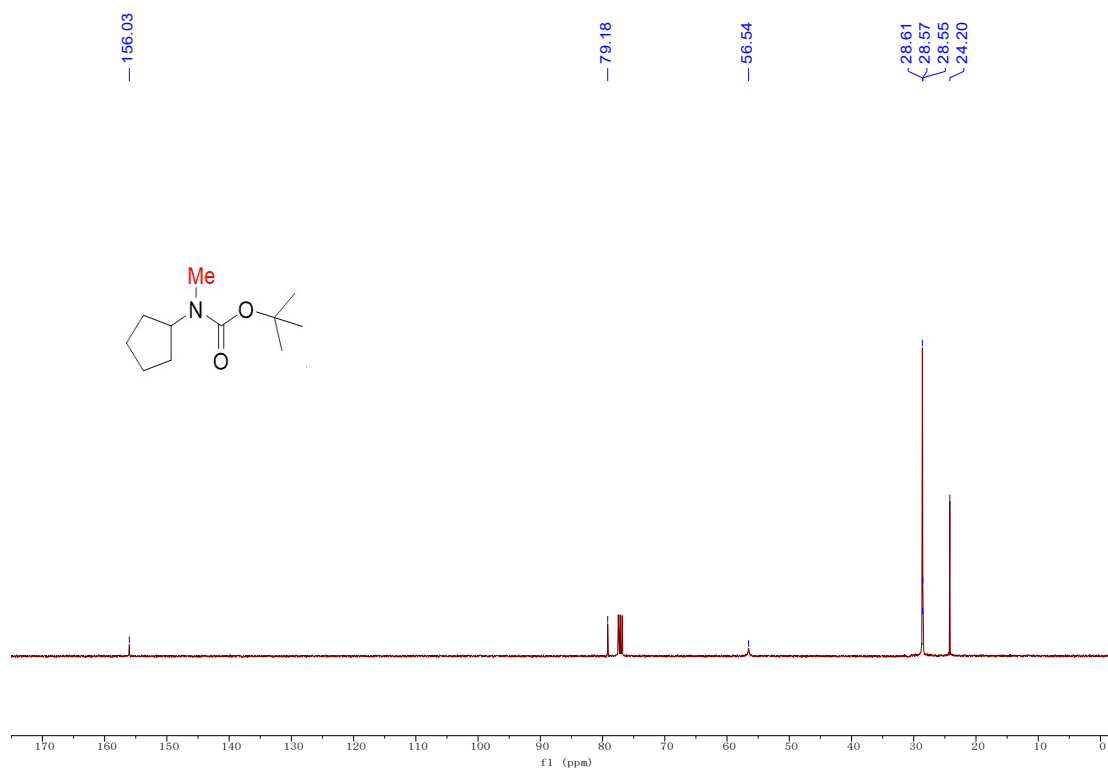

Figure S21: <sup>13</sup>C NMR (101 MHz, CDCl<sub>3</sub>, 298 K) spectrum for 9b



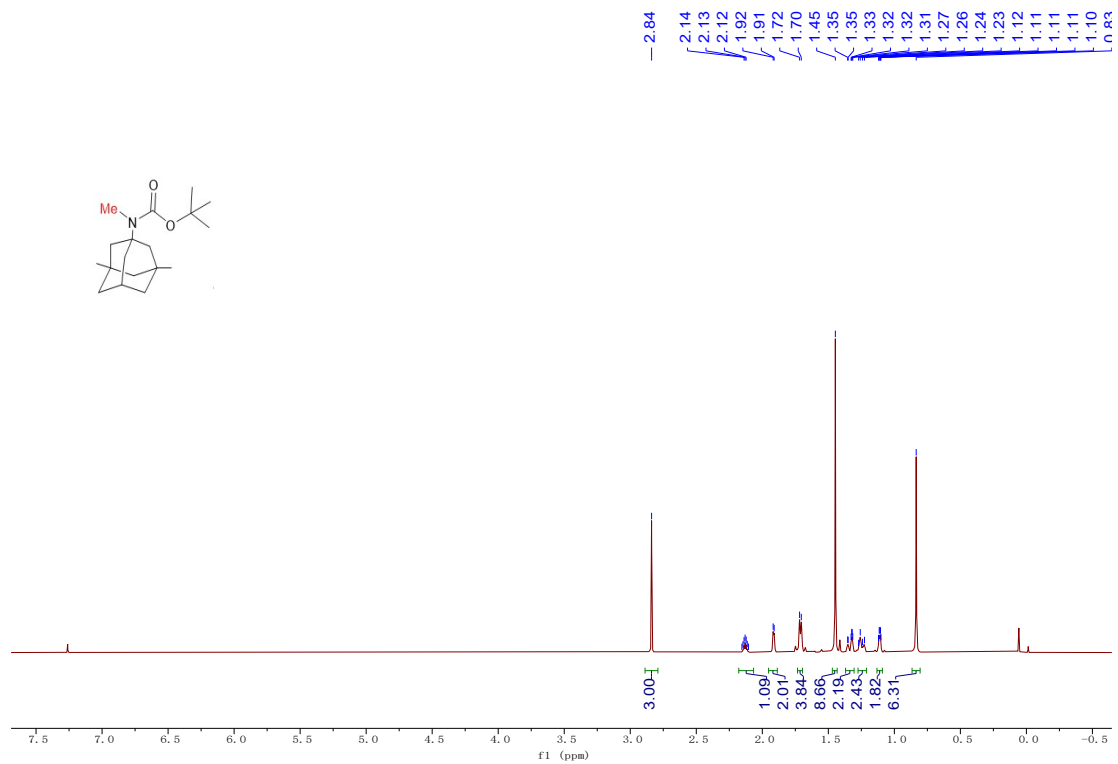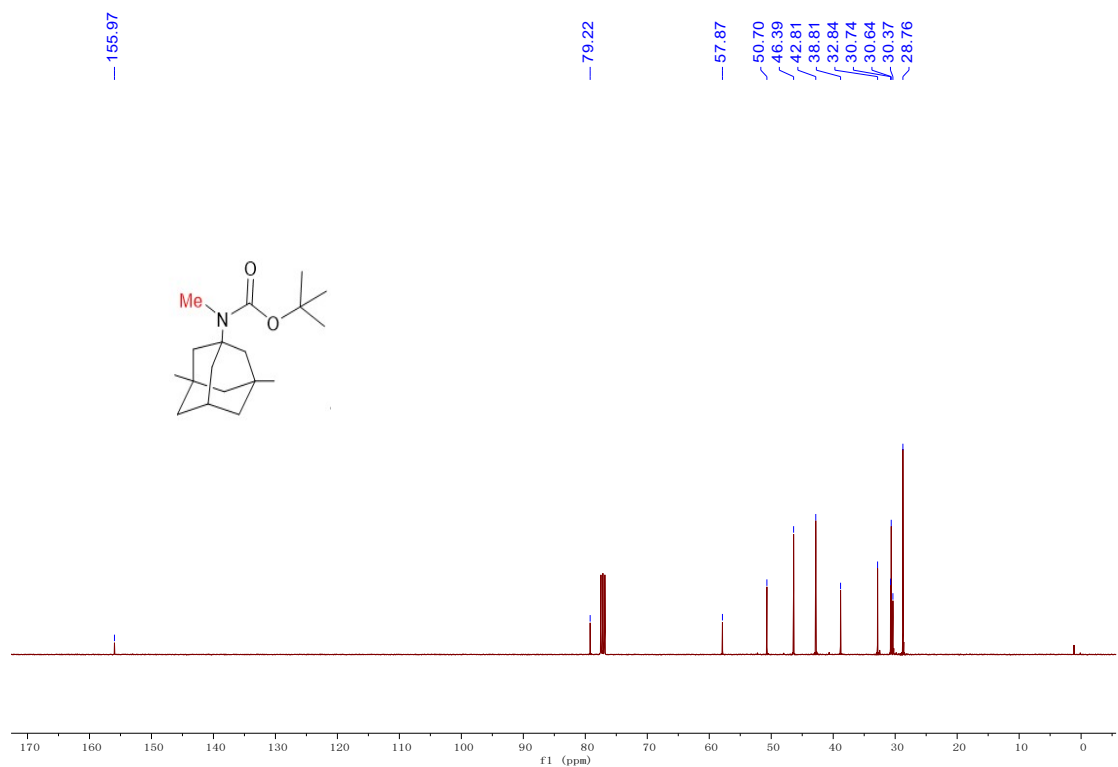

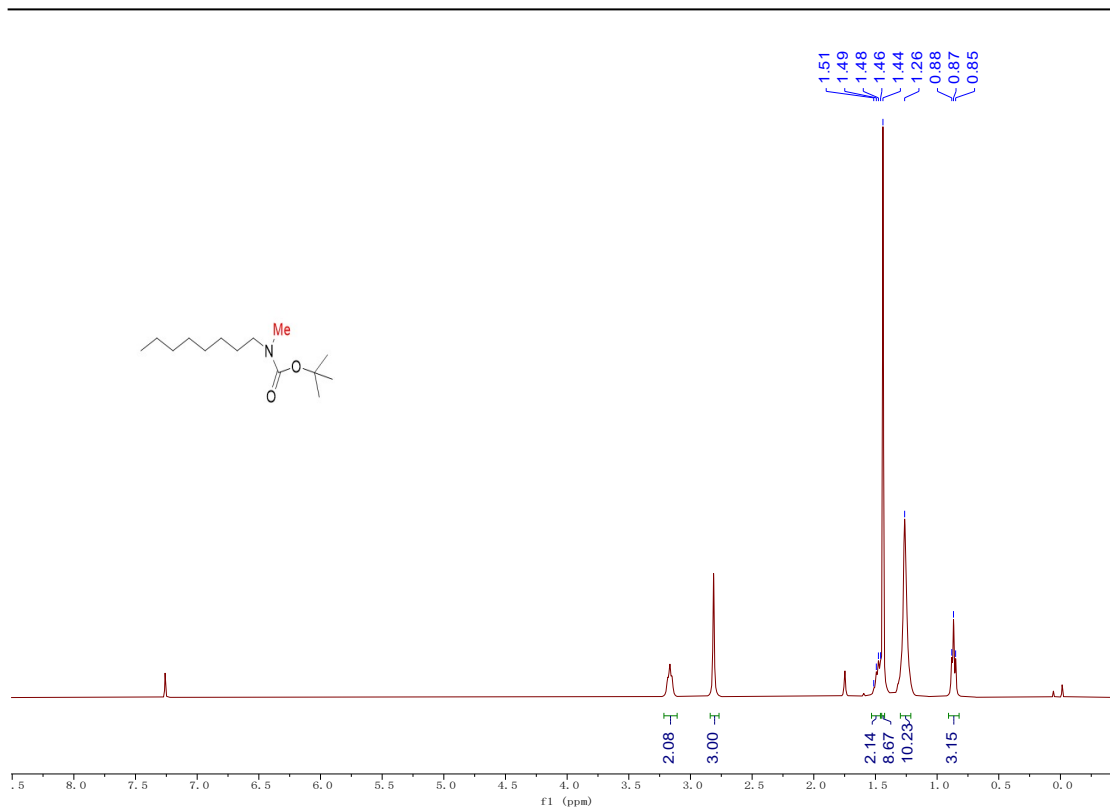

Figure S24: <sup>1</sup>H NMR (400 MHz, CDCl<sub>3</sub>, 298 K) spectrum for 9d

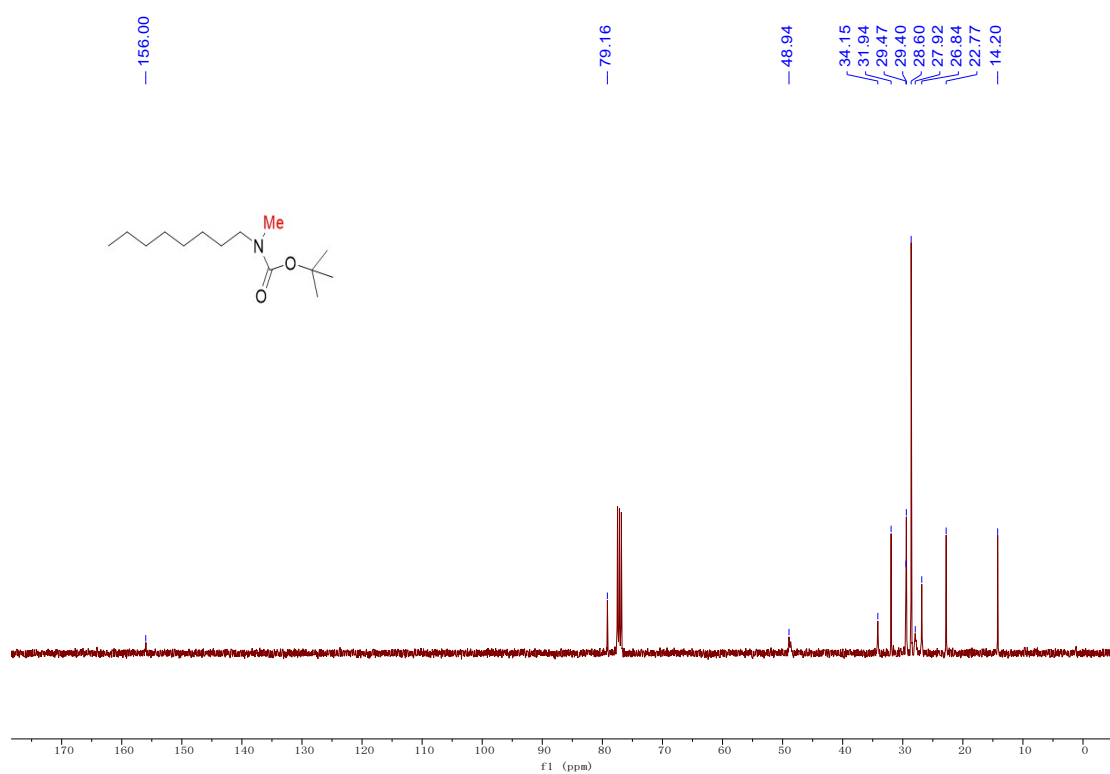

Figure S25: <sup>13</sup>C NMR (101 MHz, CDCl<sub>3</sub>, 298 K) spectrum for 9d

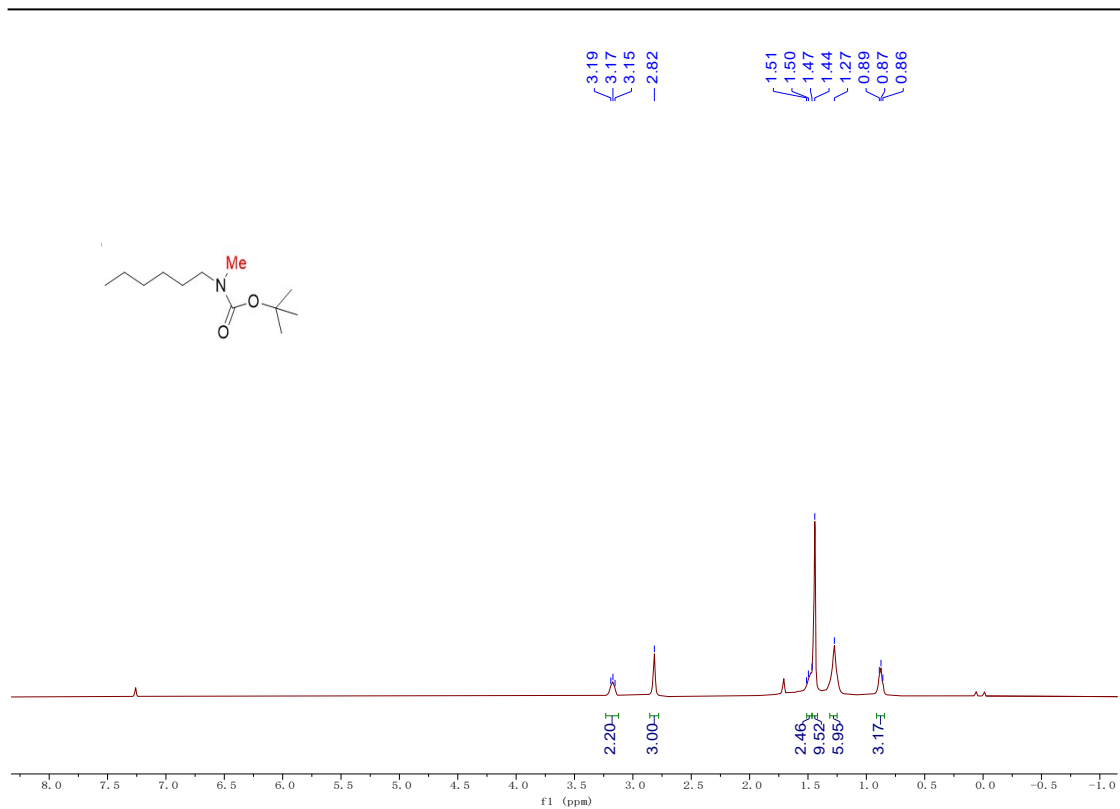

Figure S26: <sup>1</sup>H NMR (400 MHz, CDCl<sub>3</sub>, 298 K) spectrum for 9e

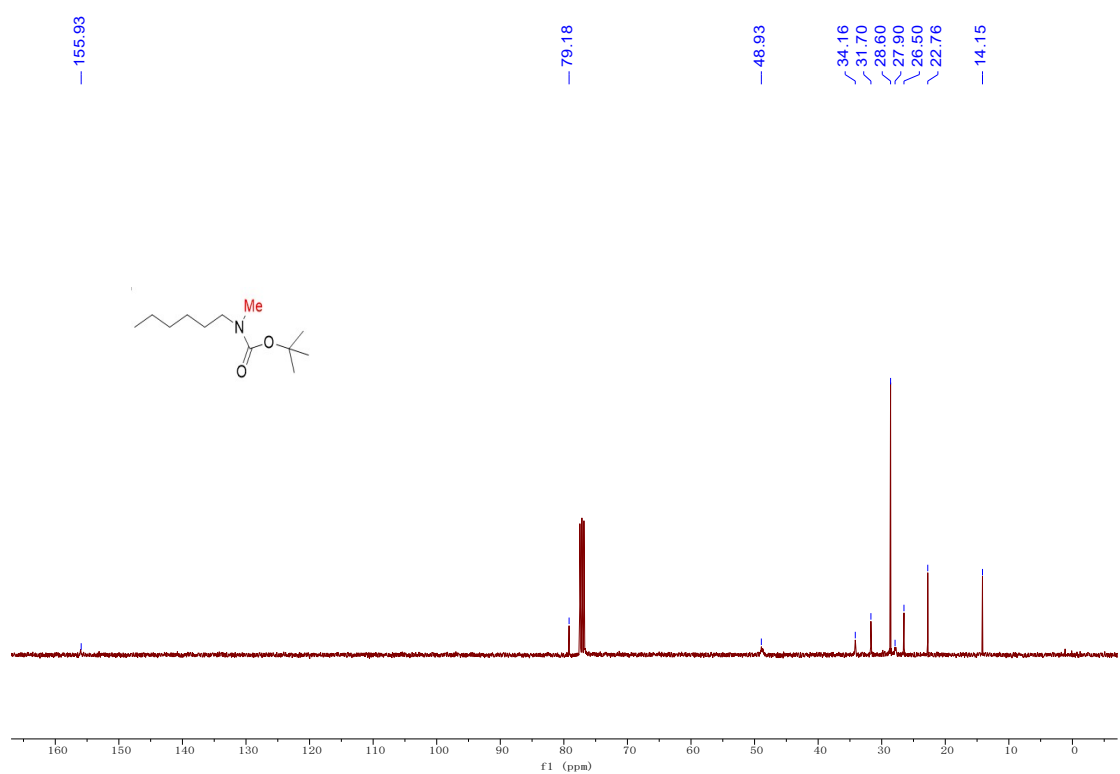

Figure S27: <sup>13</sup>C NMR (101 MHz, CDCl<sub>3</sub>, 298 K) spectrum for 9e

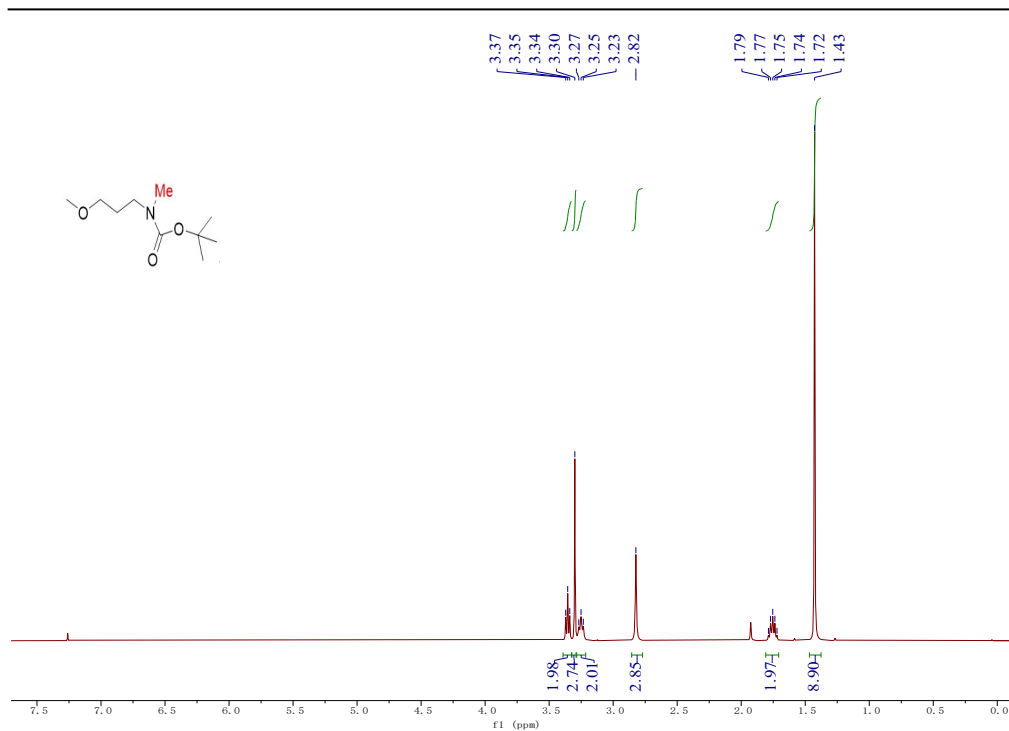

Figure S28:  $^1\text{H}$  NMR (400 MHz,  $\text{CDCl}_3$ , 298 K) spectrum for 9f

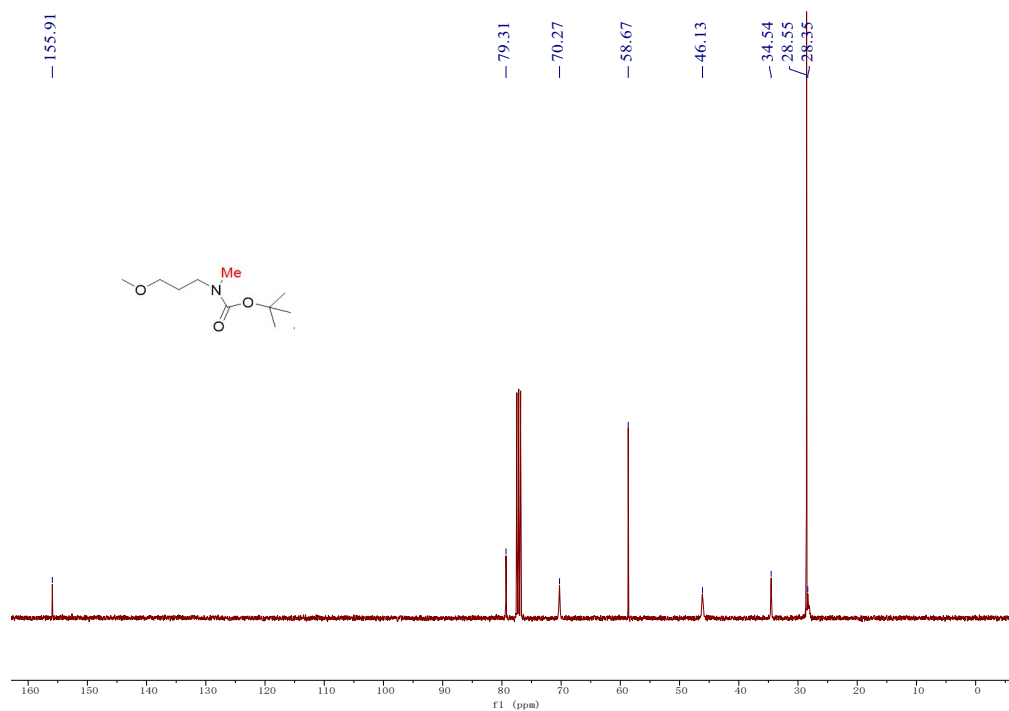

Figure S29:  $^{13}\text{C}$  NMR (101 MHz,  $\text{CDCl}_3$ , 298 K) spectrum for 9f

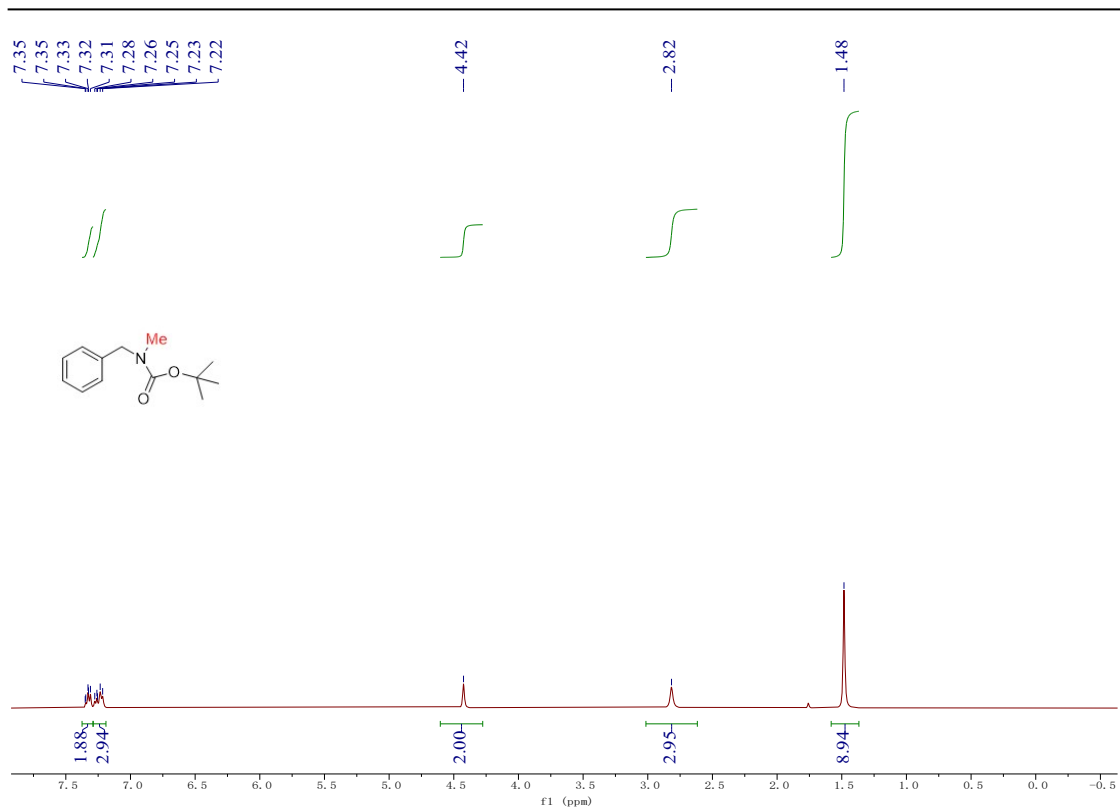

Figure S30: <sup>1</sup>H NMR (400 MHz, CDCl<sub>3</sub>, 298 K) spectrum for 9g

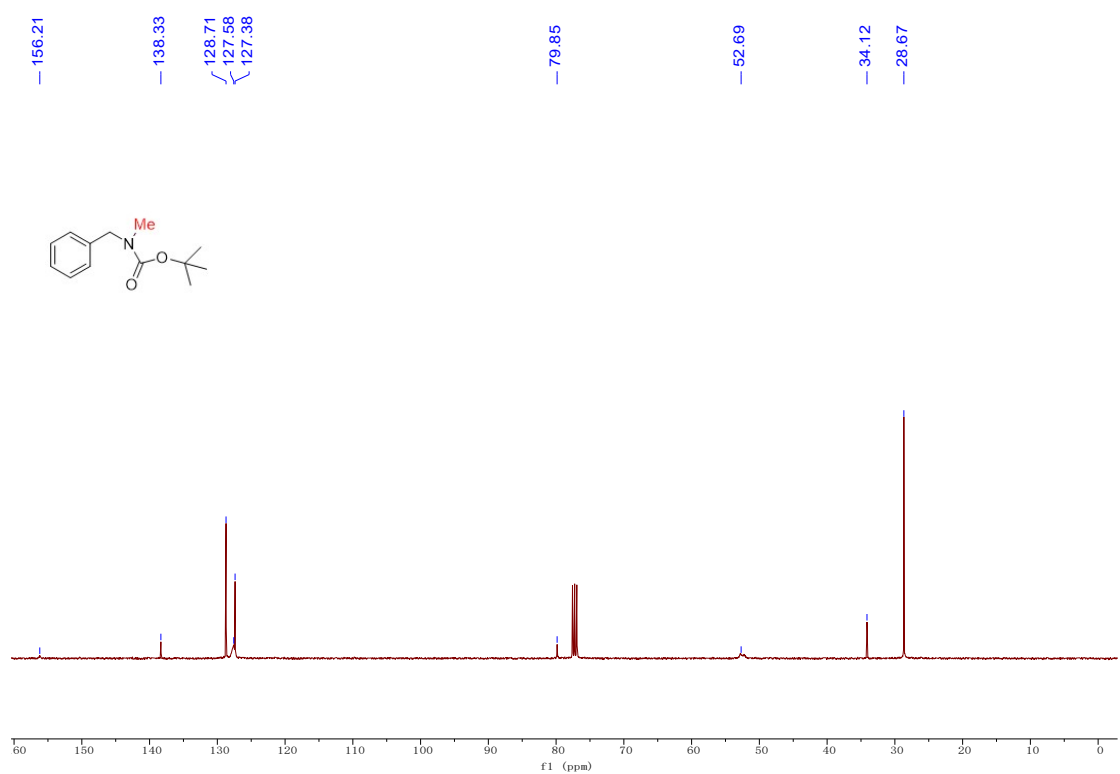

Figure S31: <sup>13</sup>C NMR (101 MHz, CDCl<sub>3</sub>, 298 K) spectrum for 9g

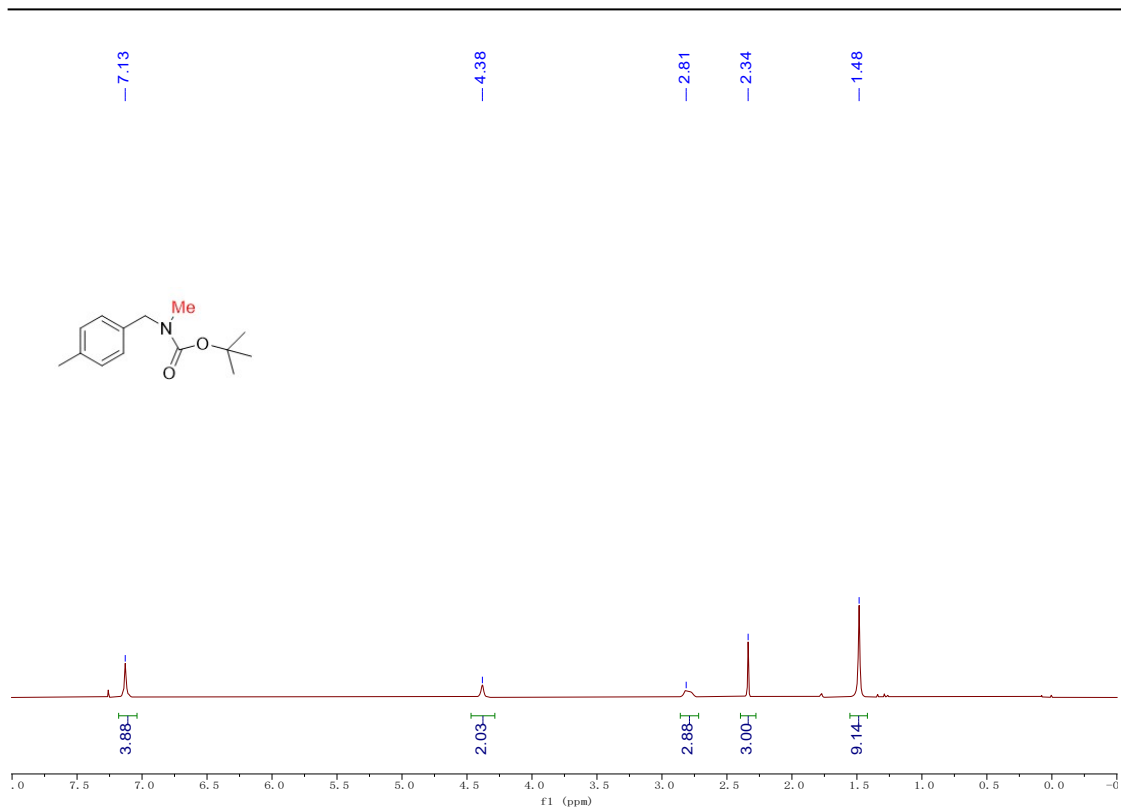

Figure S32: <sup>1</sup>H NMR (400 MHz, CDCl<sub>3</sub>, 298 K) spectrum for 9h

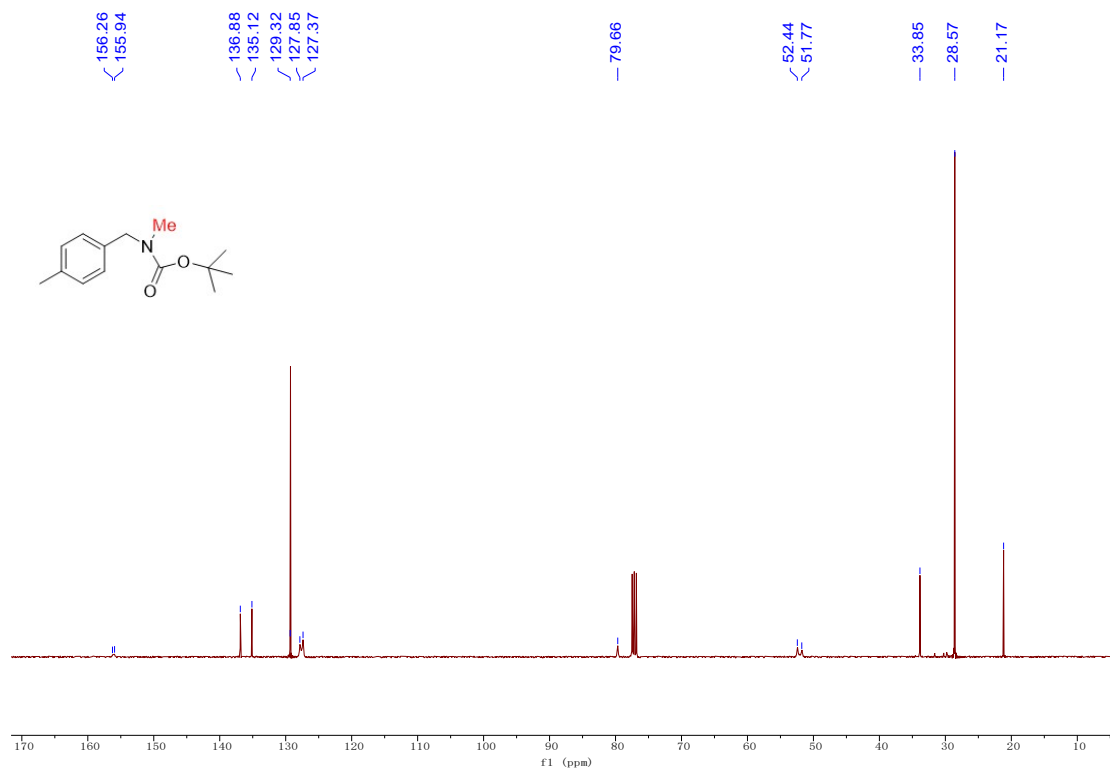

Figure S33: <sup>13</sup>C NMR (101 MHz, CDCl<sub>3</sub>, 298 K) spectrum for 9h

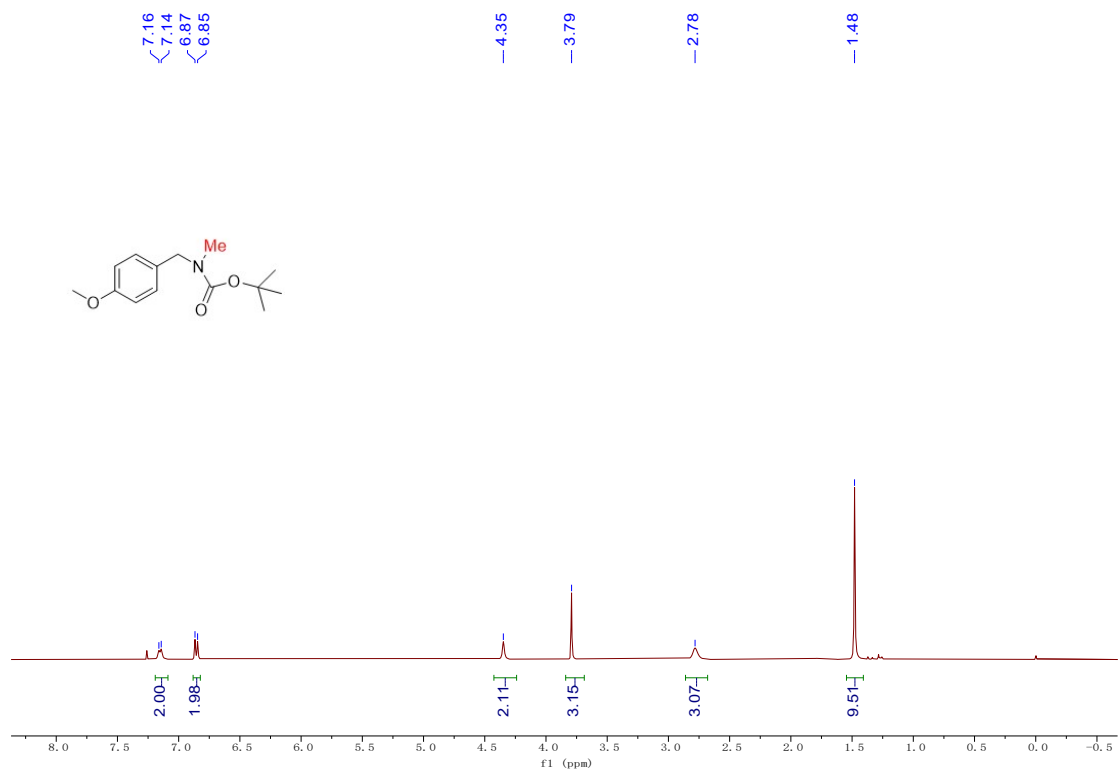

Figure S34: <sup>1</sup>H NMR (400 MHz, CDCl<sub>3</sub>, 298 K) spectrum for 9i

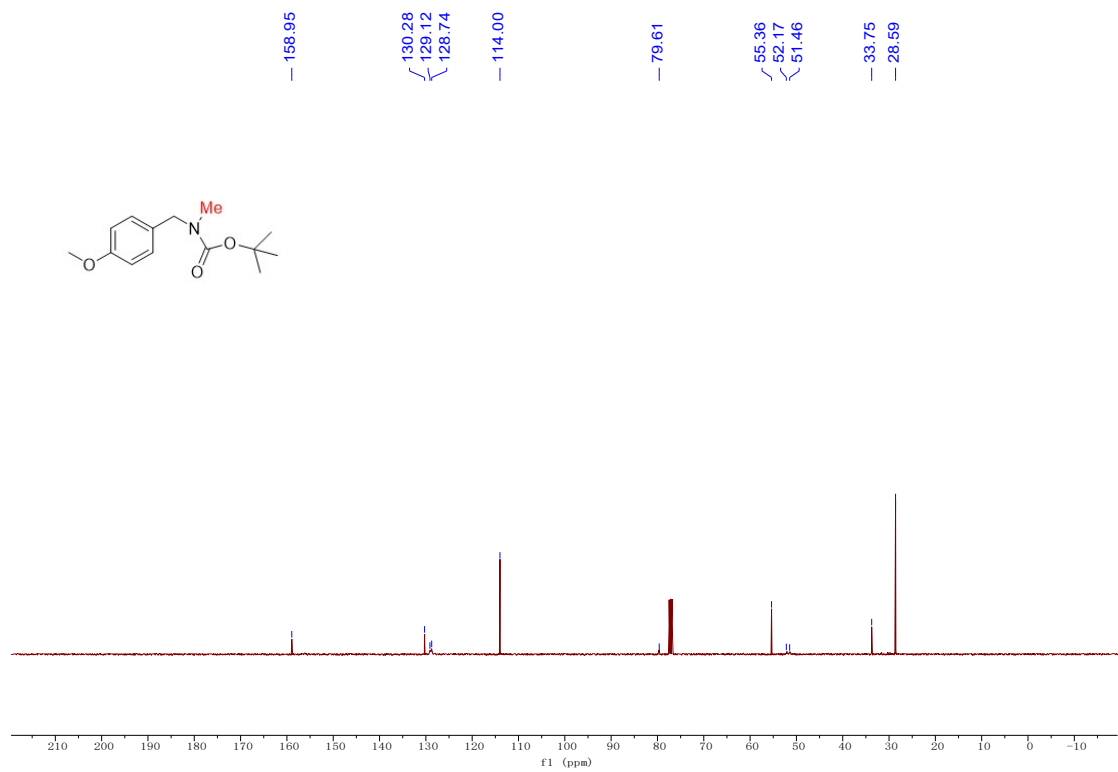

Figure S35: <sup>13</sup>C NMR (101 MHz, CDCl<sub>3</sub>, 298 K) spectrum for 9i

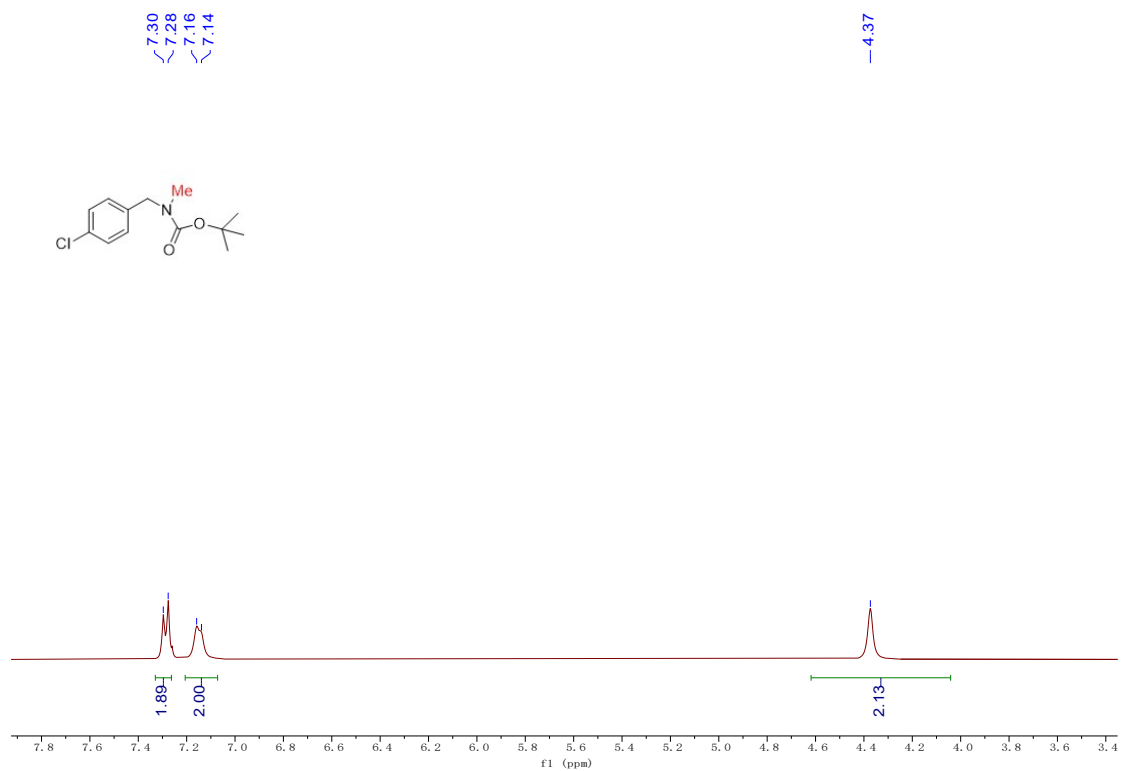

Figure S36: <sup>1</sup>H NMR (400 MHz, CDCl<sub>3</sub>, 298 K) spectrum for 9j

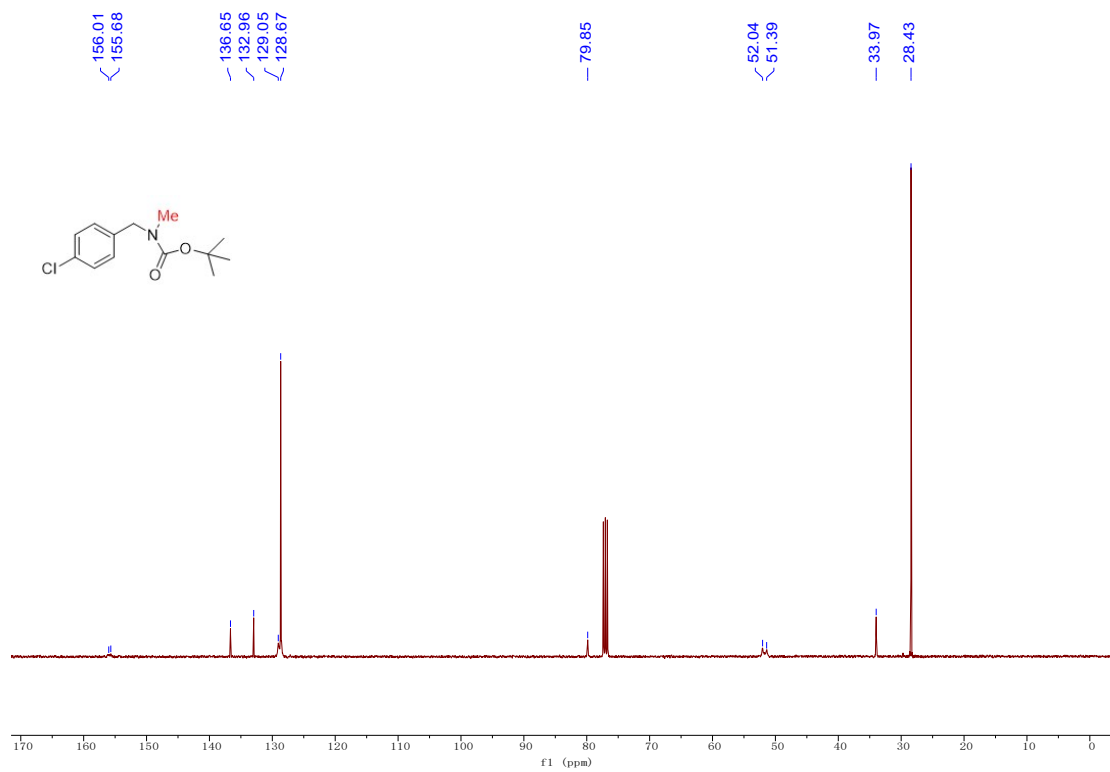

Figure S37: <sup>13</sup>C NMR (101 MHz, CDCl<sub>3</sub>, 298 K) spectrum for 9j



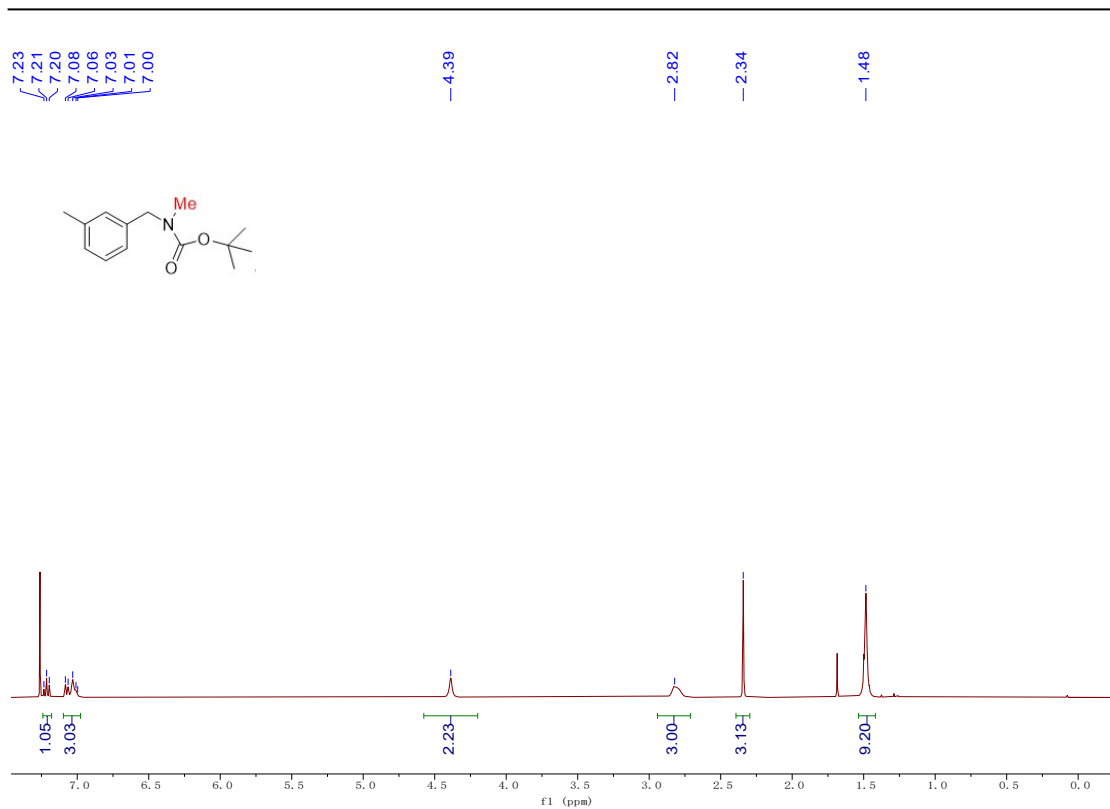

**Figure S38: <sup>1</sup>H NMR (400 MHz, CDCl<sub>3</sub>, 298 K) spectrum for 9k**

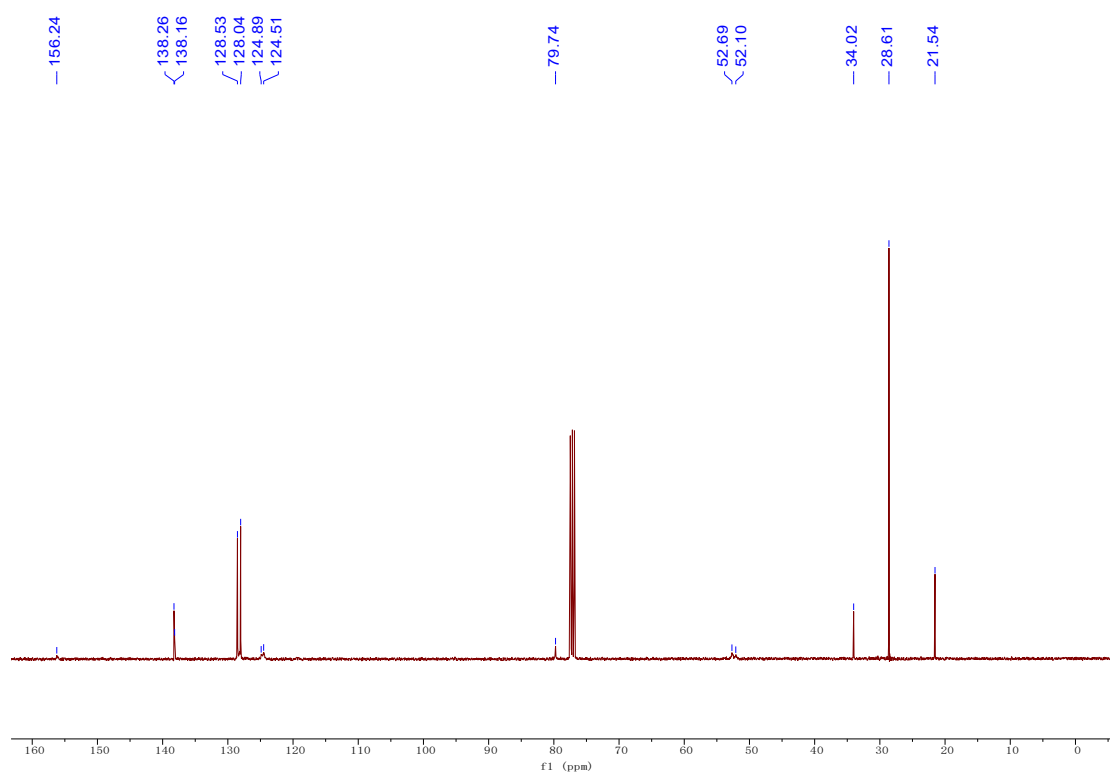

**Figure S39: <sup>13</sup>C NMR (101 MHz, CDCl<sub>3</sub>, 298 K) spectrum for 9k**

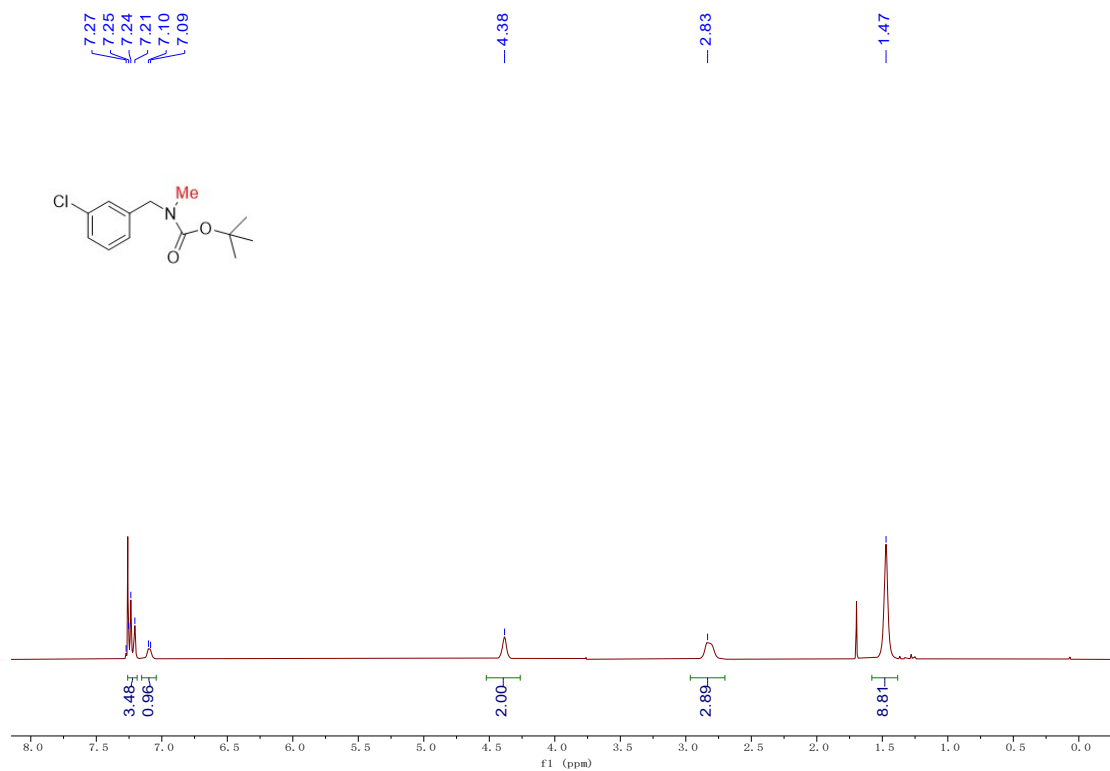

**Figure S40:  $^1\text{H}$  NMR (400 MHz,  $\text{CDCl}_3$ , 298 K) spectrum for **9l****

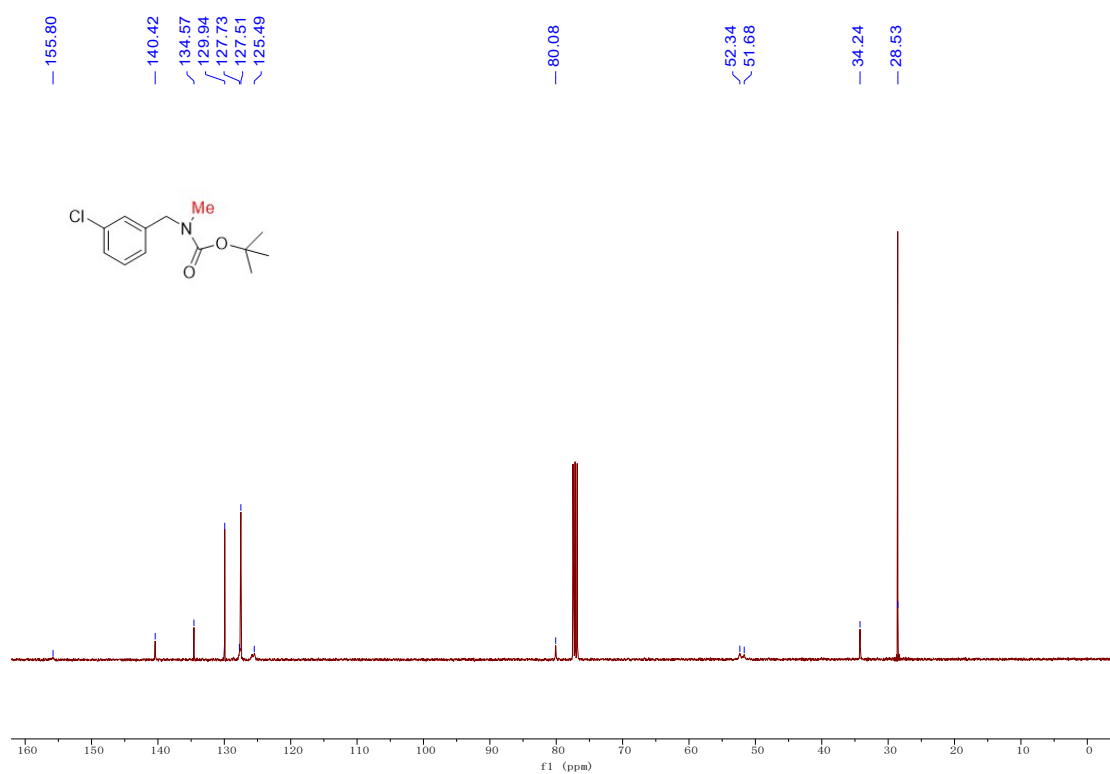

**Figure S41:  $^{13}\text{C}$  NMR (101 MHz,  $\text{CDCl}_3$ , 298 K) spectrum for **9l****

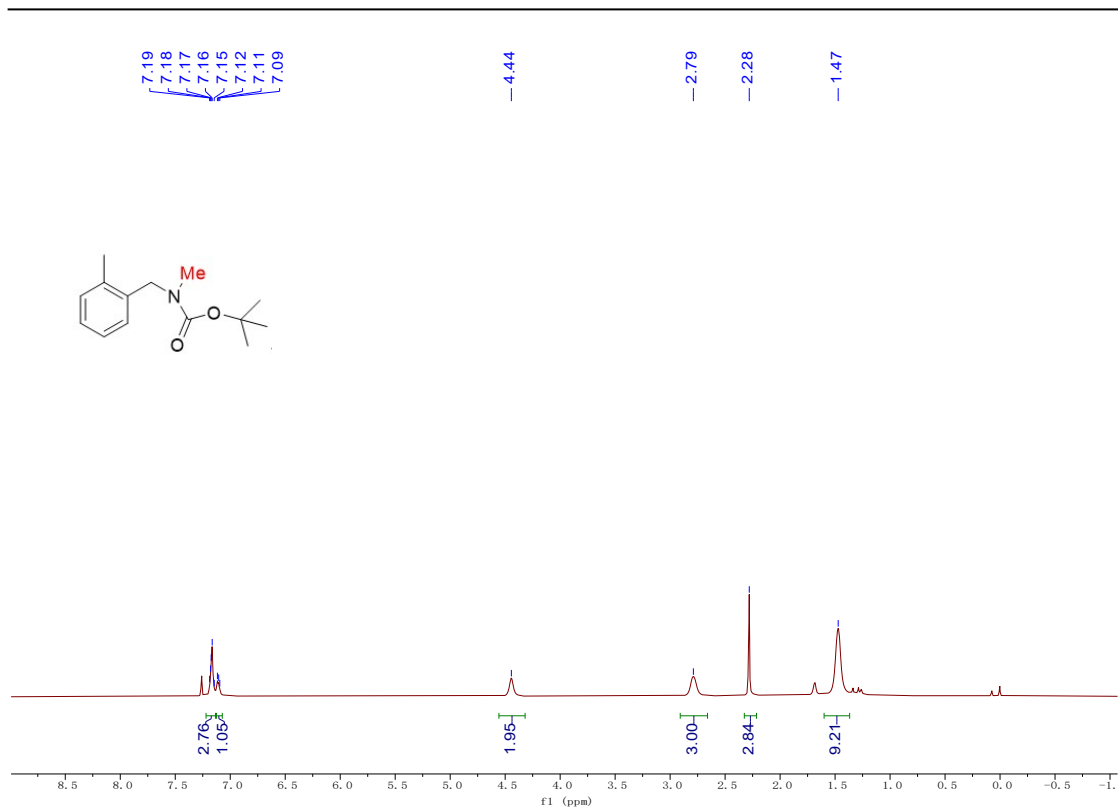

Figure S42: <sup>1</sup>H NMR (400 MHz, CDCl<sub>3</sub>, 298 K) spectrum for 9m

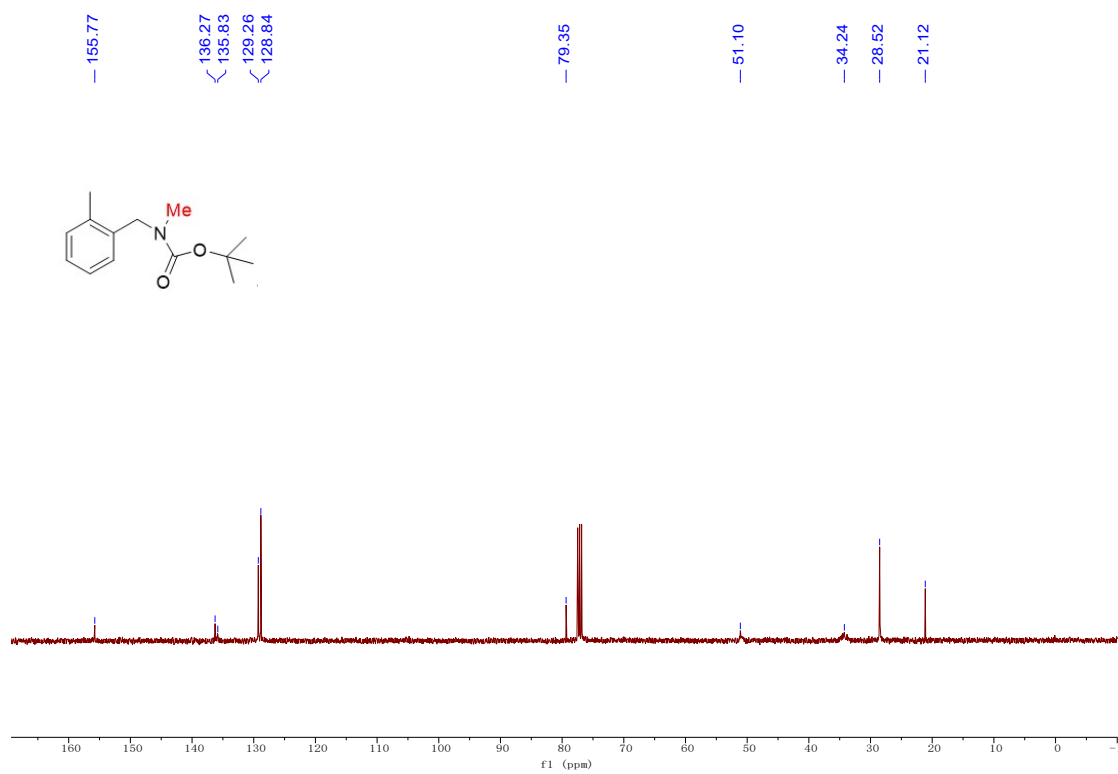

Figure S43: <sup>13</sup>C NMR (101 MHz, CDCl<sub>3</sub>, 298 K) spectrum for 9m

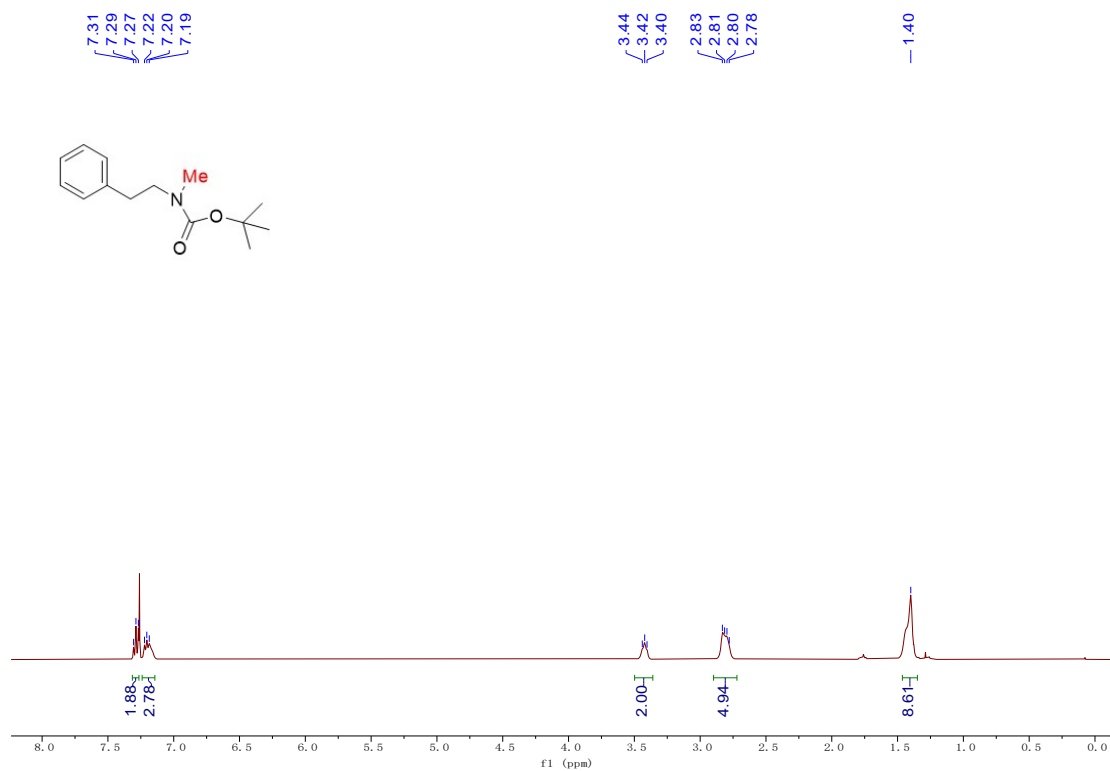

Figure S44: <sup>1</sup>H NMR (400 MHz, CDCl<sub>3</sub>, 298 K) spectrum for 9n

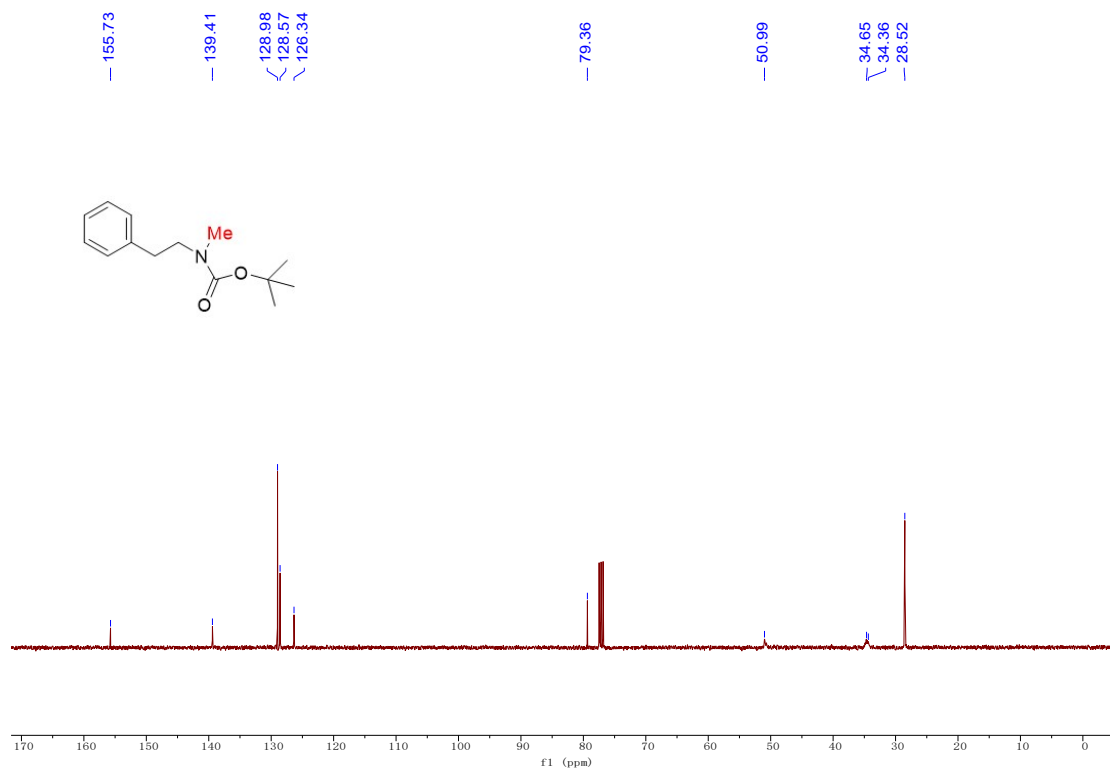

Figure S45: <sup>13</sup>C NMR (101 MHz, CDCl<sub>3</sub>, 298 K) spectrum for 9n

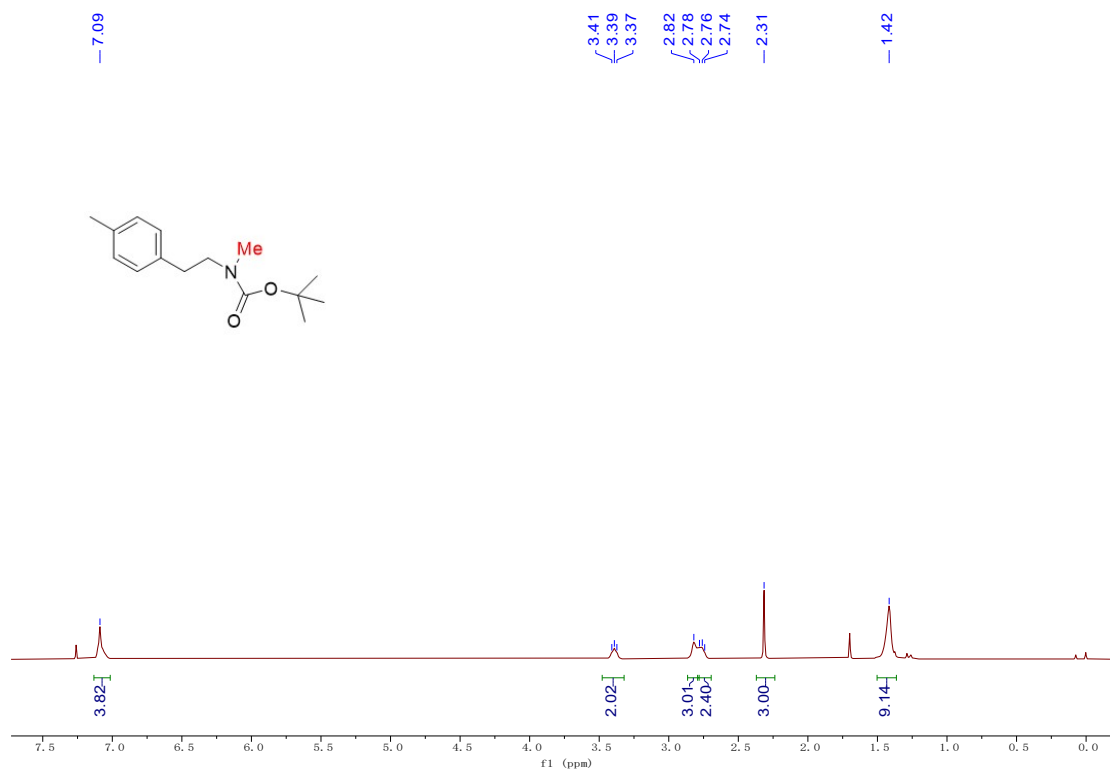

Figure S46: <sup>1</sup>H NMR (400 MHz, CDCl<sub>3</sub>, 298 K) spectrum for 9o

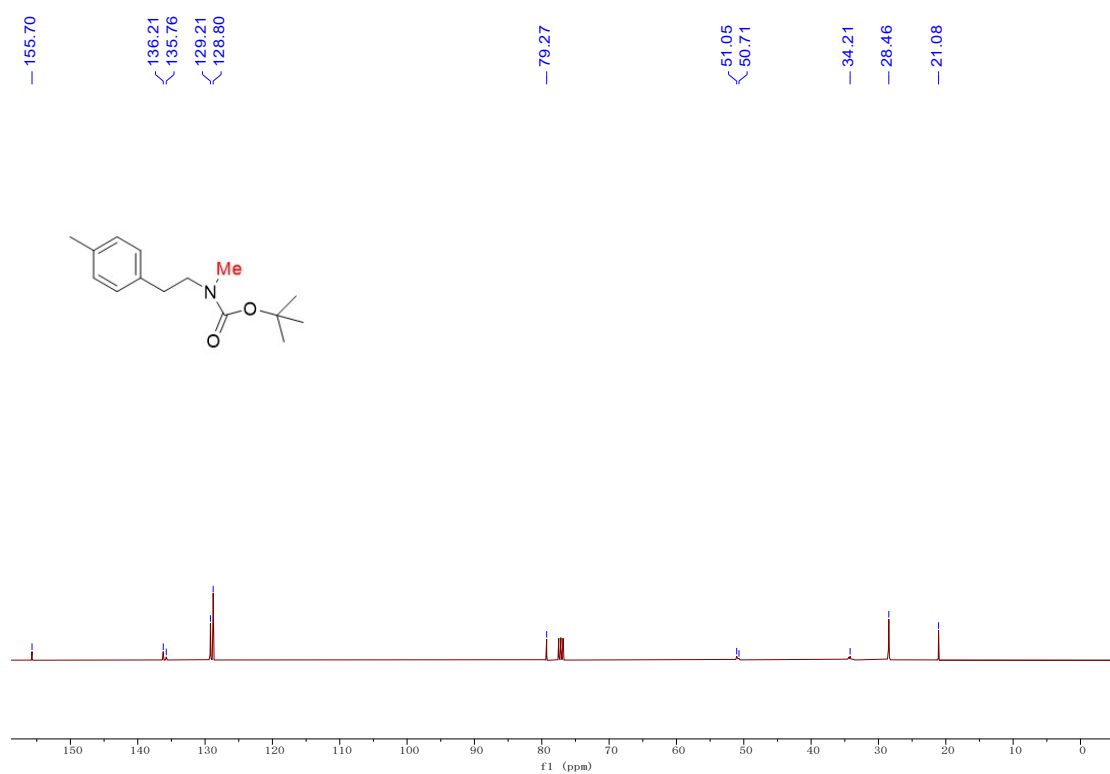

Figure S47: <sup>13</sup>C NMR (101 MHz, CDCl<sub>3</sub>, 298 K) spectrum for 9o

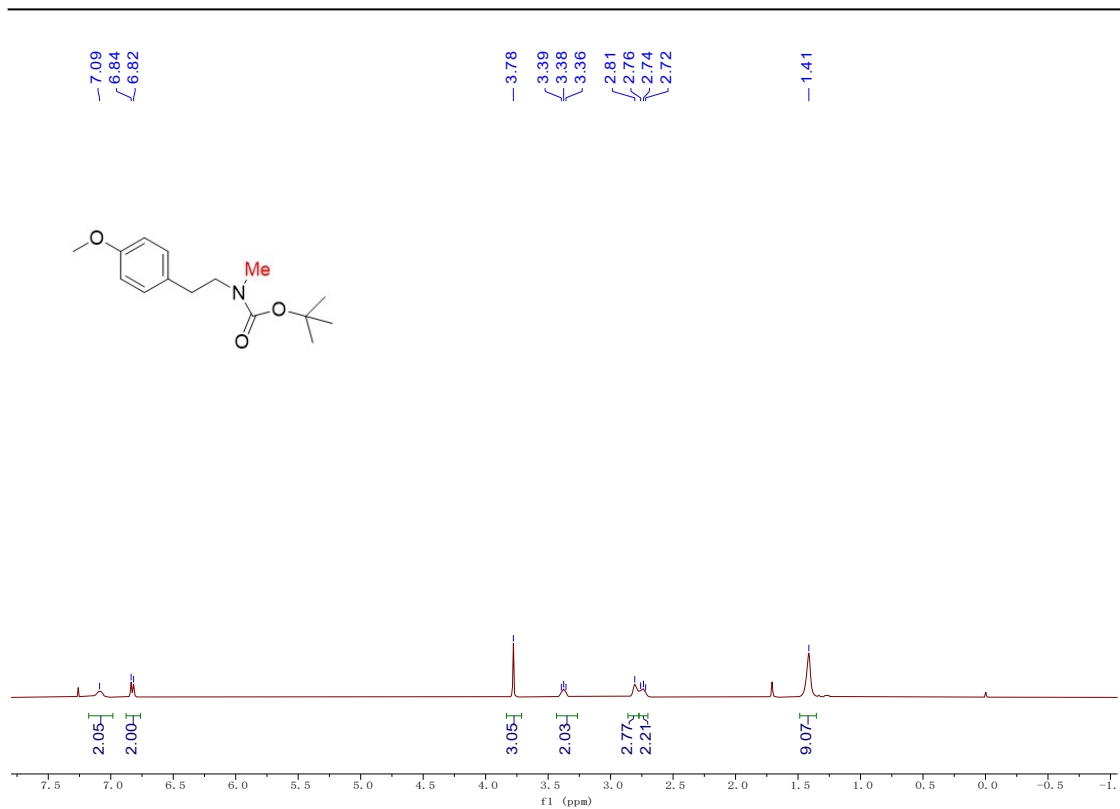

Figure S48: <sup>1</sup>H NMR (400 MHz, CDCl<sub>3</sub>, 298 K) spectrum for 9p

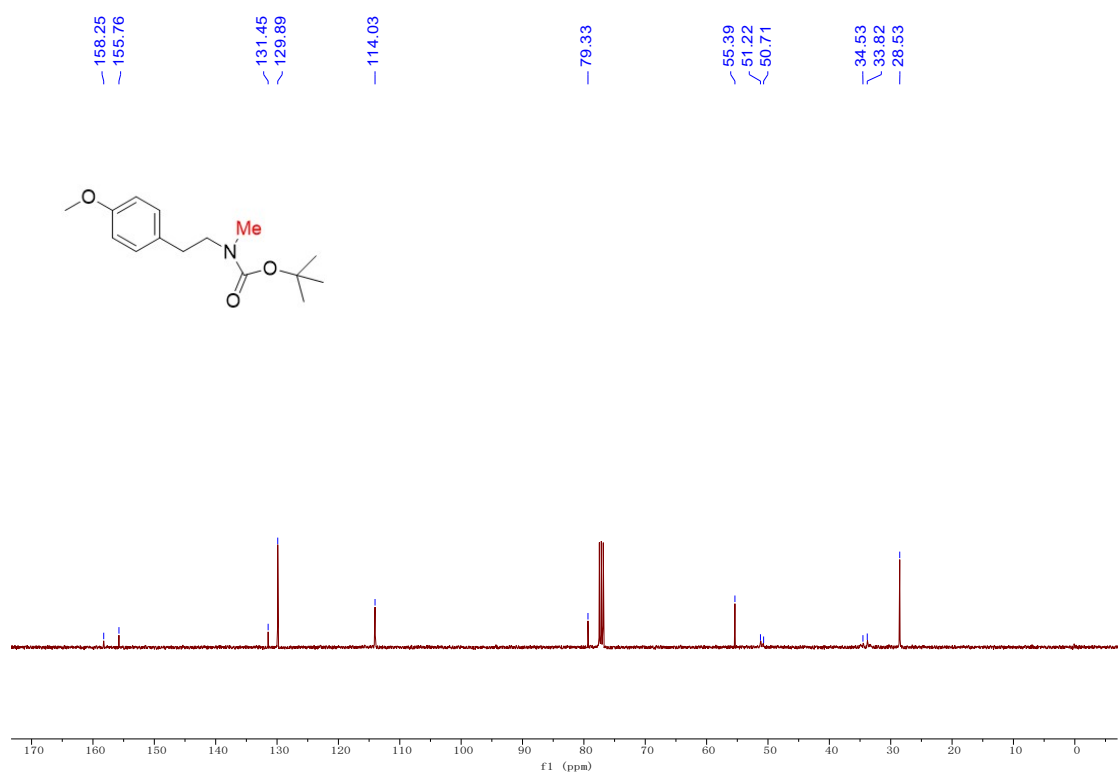

Figure S49: <sup>13</sup>C NMR (101 MHz, CDCl<sub>3</sub>, 298 K) spectrum for 9p

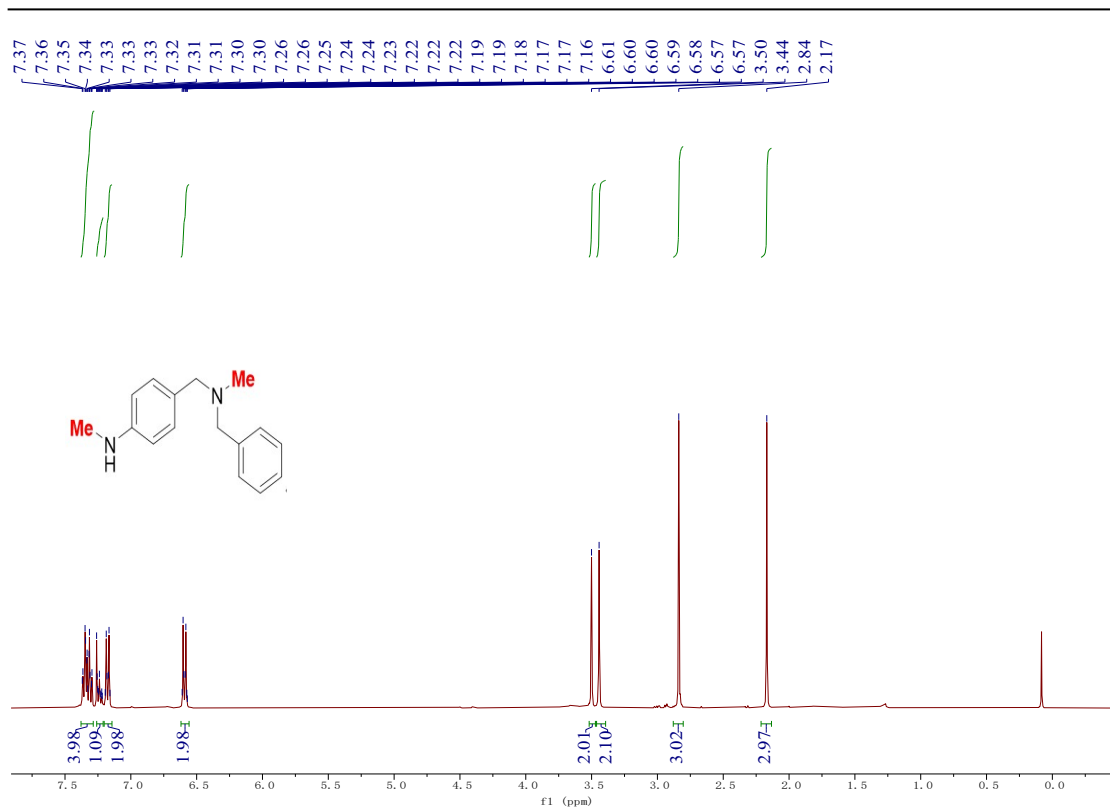

Figure S50: <sup>1</sup>H NMR (400 MHz, CDCl<sub>3</sub>, 298 K) spectrum for 9q

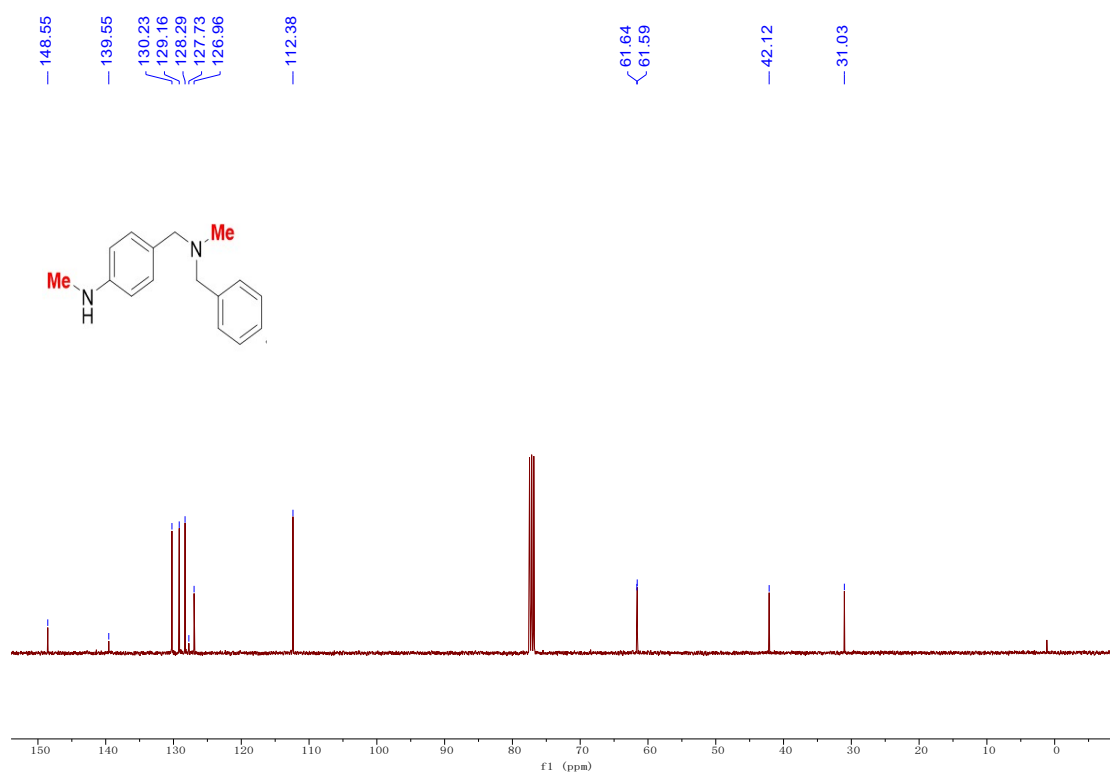

Figure S51: <sup>13</sup>C NMR (101 MHz, CDCl<sub>3</sub>, 298 K) spectrum for 9q

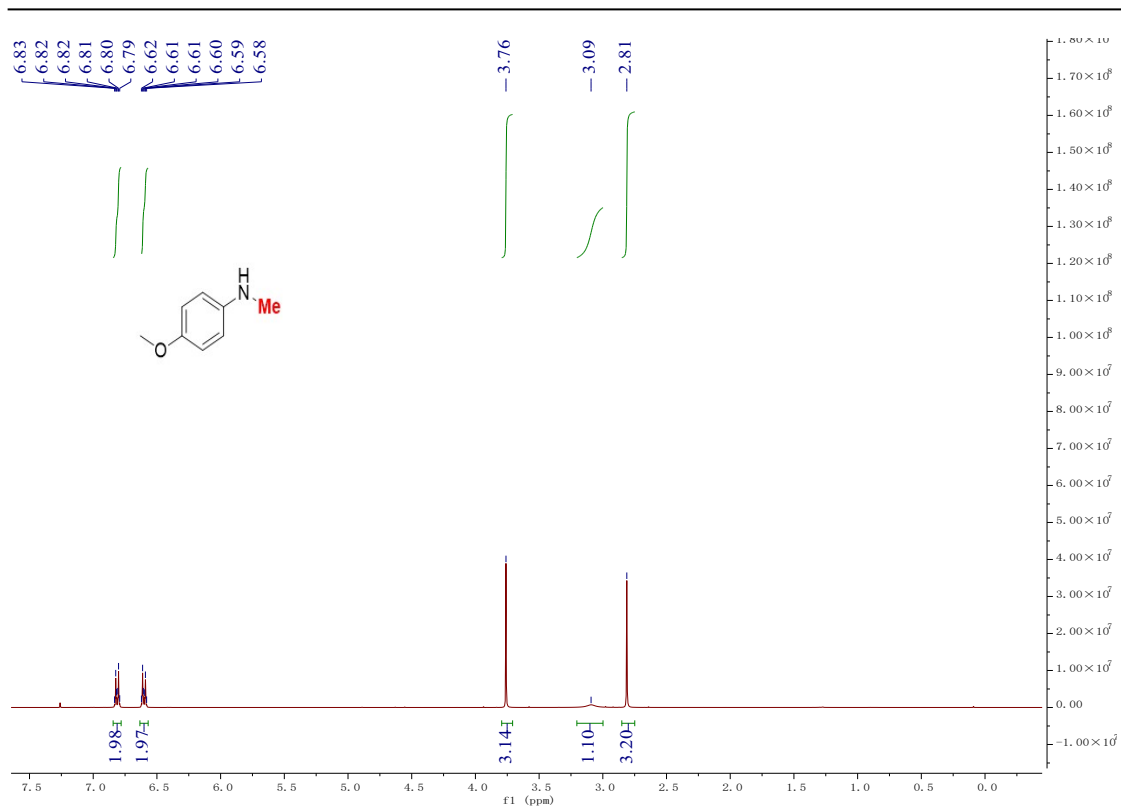

Figure S52:  $^1\text{H}$  NMR (400 MHz,  $\text{CDCl}_3$ , 298 K) spectrum for 11b

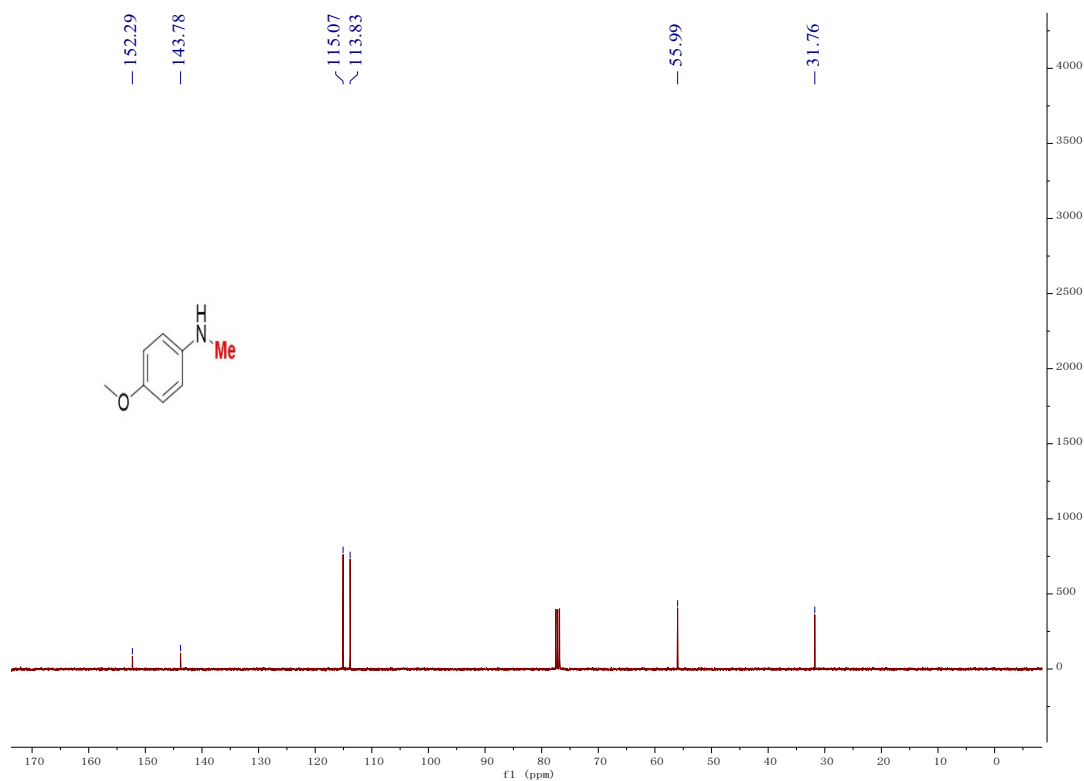

Figure S53:  $^{13}\text{C}$  NMR (101 MHz,  $\text{CDCl}_3$ , 298 K) spectrum for 11b



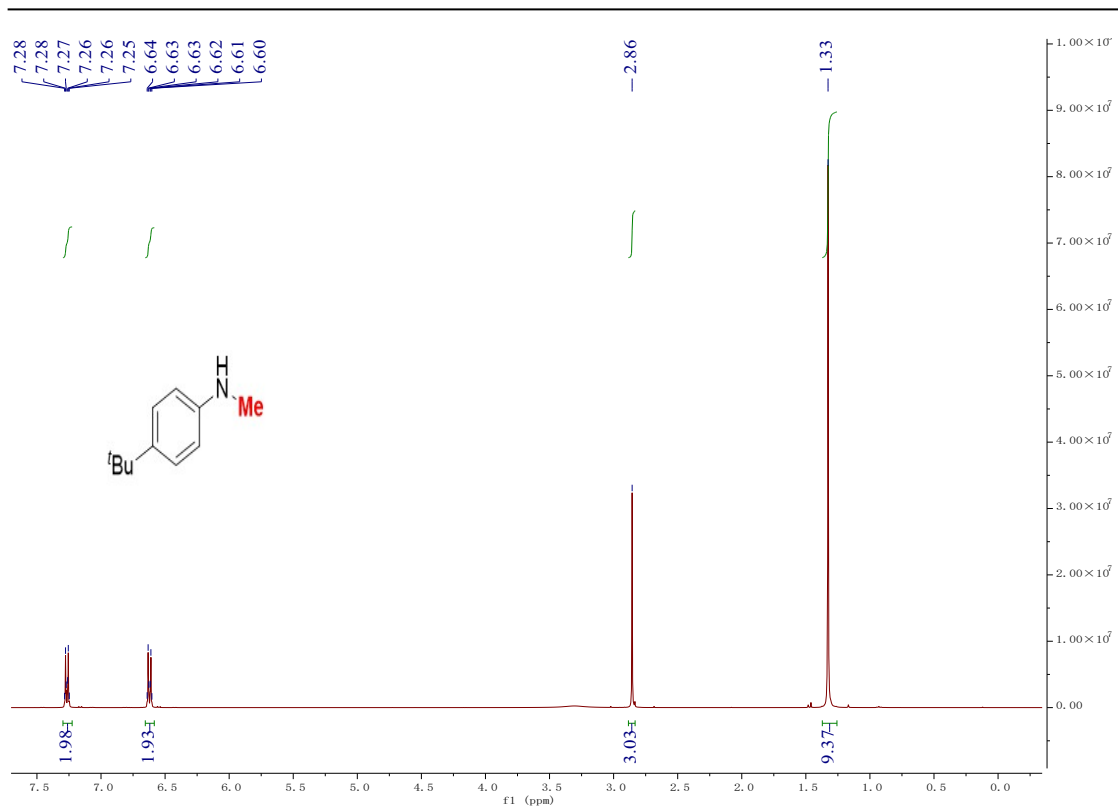

Figure S54:  $^1\text{H}$  NMR (400 MHz,  $\text{CDCl}_3$ , 298 K) spectrum for 11c

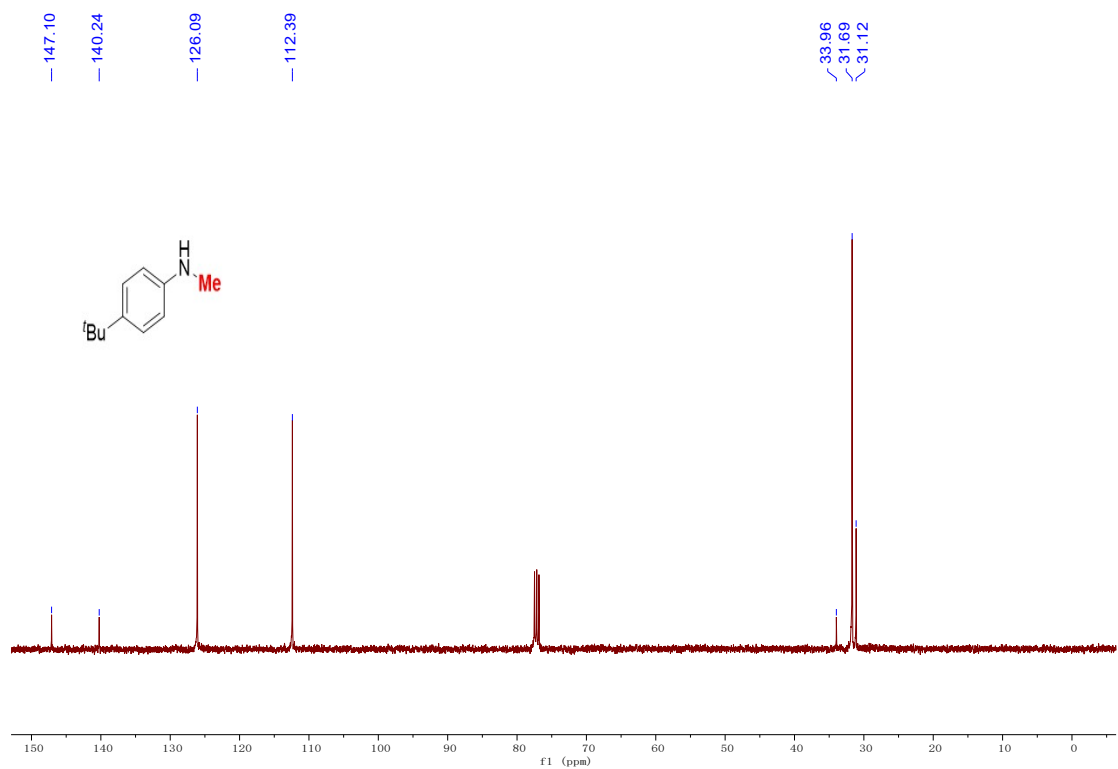

Figure S55:  $^{13}\text{C}$  NMR (101 MHz,  $\text{CDCl}_3$ , 298 K) spectrum for 11c

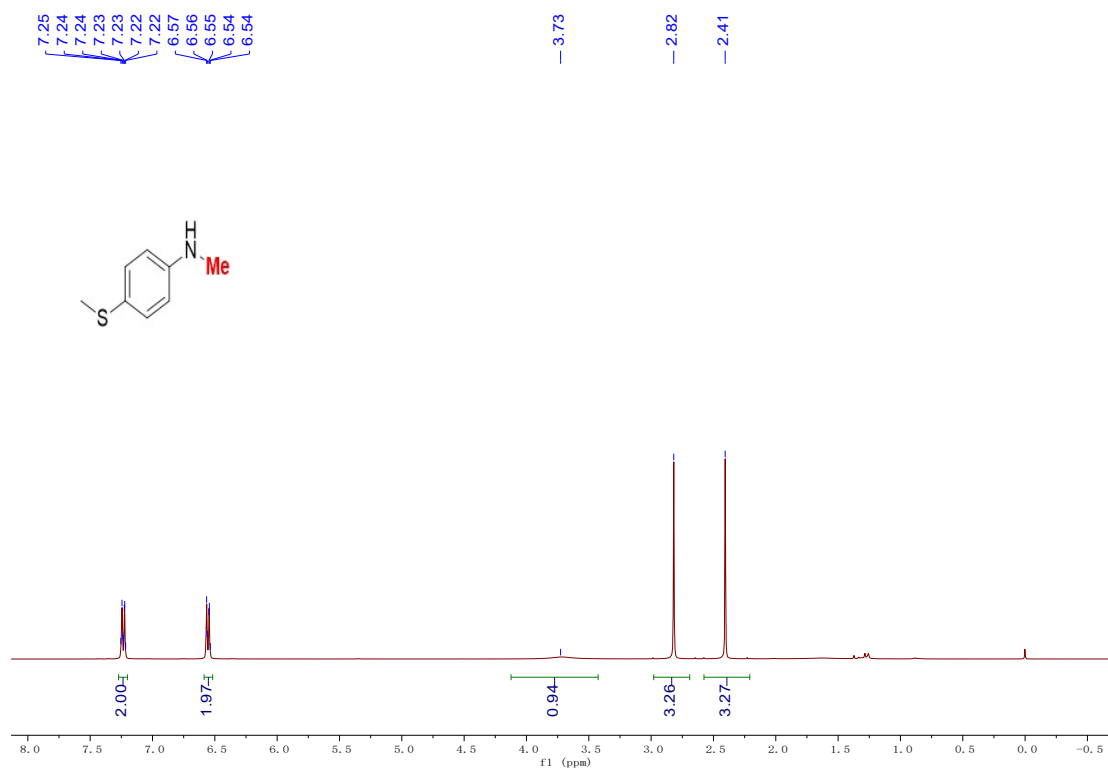

Figure S56: <sup>1</sup>H NMR (400 MHz, CDCl<sub>3</sub>, 298 K) spectrum for 11d

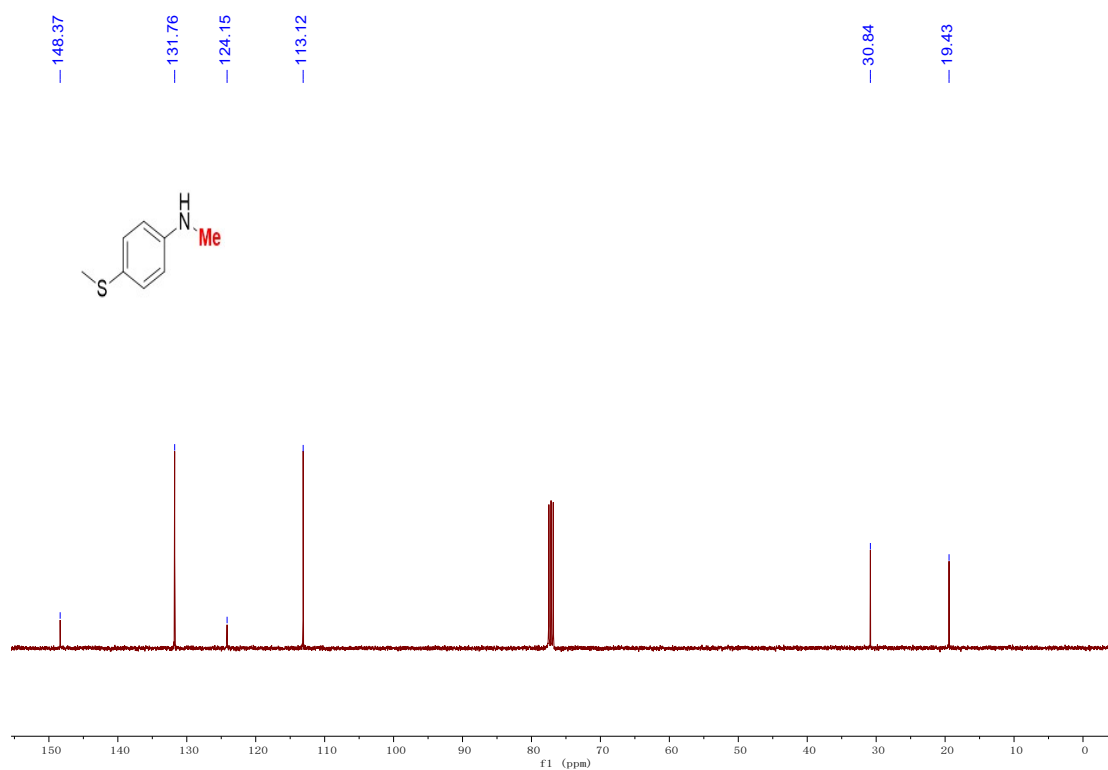

Figure S57: <sup>13</sup>C NMR (101 MHz, CDCl<sub>3</sub>, 298 K) spectrum for 11d

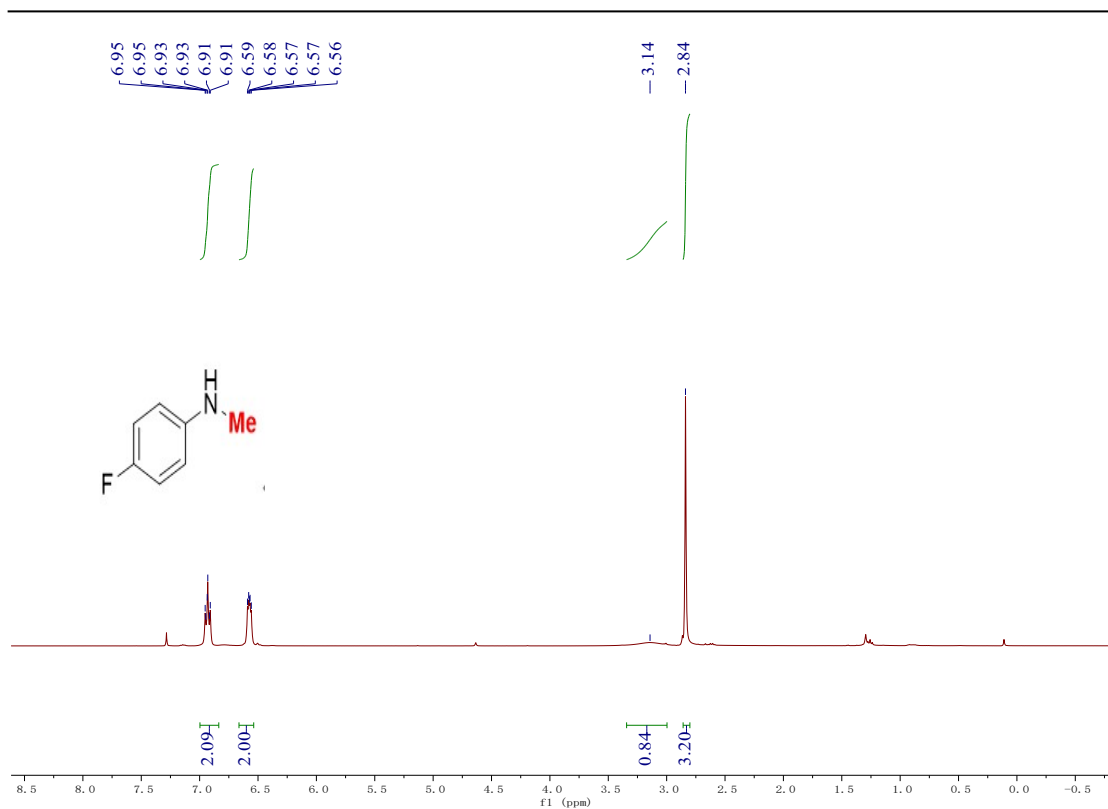

Figure S58: <sup>1</sup>H NMR (400 MHz, CDCl<sub>3</sub>, 298 K) spectrum for 11e

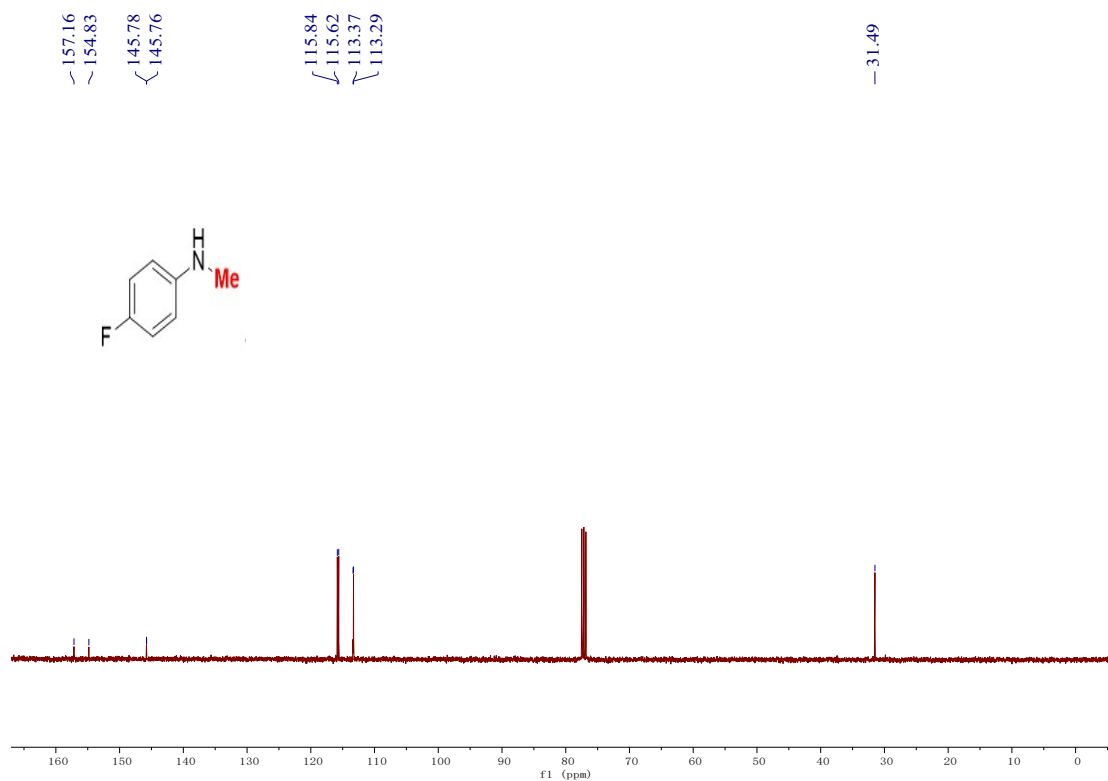

Figure S59: <sup>13</sup>C NMR (101 MHz, CDCl<sub>3</sub>, 298 K) spectrum for 11e

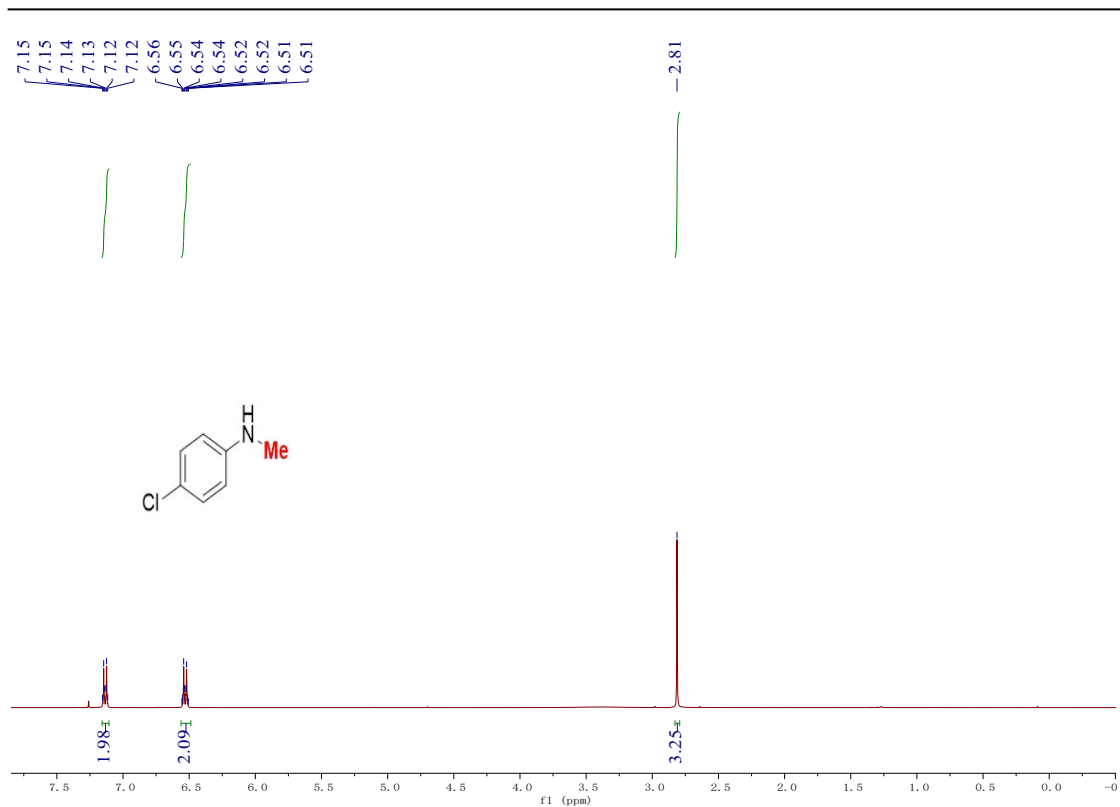

Figure S60:  $^1\text{H}$  NMR (400 MHz,  $\text{CDCl}_3$ , 298 K) spectrum for 11f

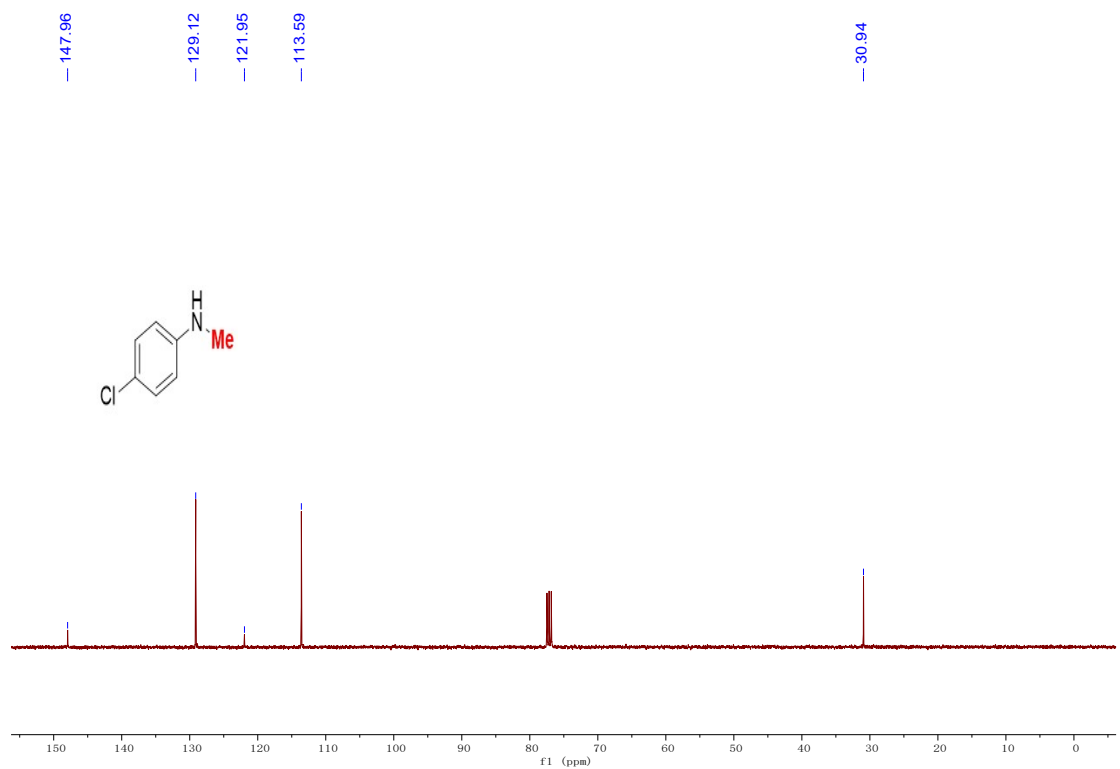

Figure S61:  $^{13}\text{C}$  NMR (101 MHz,  $\text{CDCl}_3$ , 298 K) spectrum for 11f

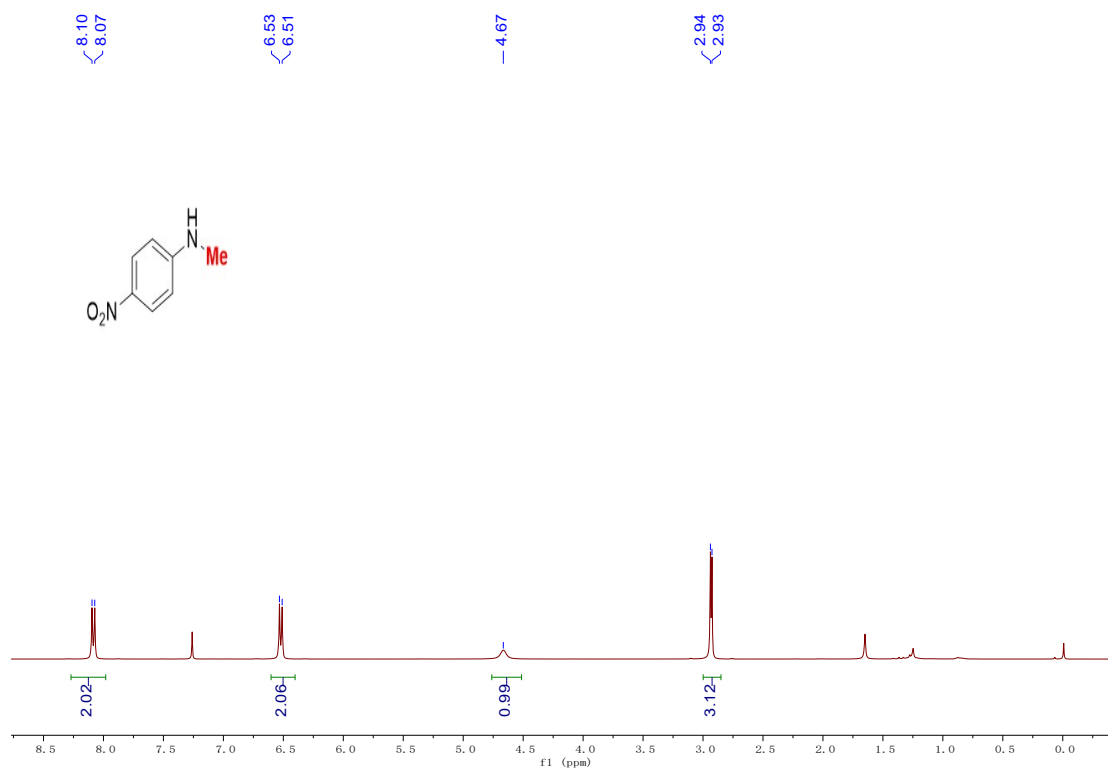

Figure S62: <sup>1</sup>H NMR (400 MHz, CDCl<sub>3</sub>, 298 K) spectrum for 11g

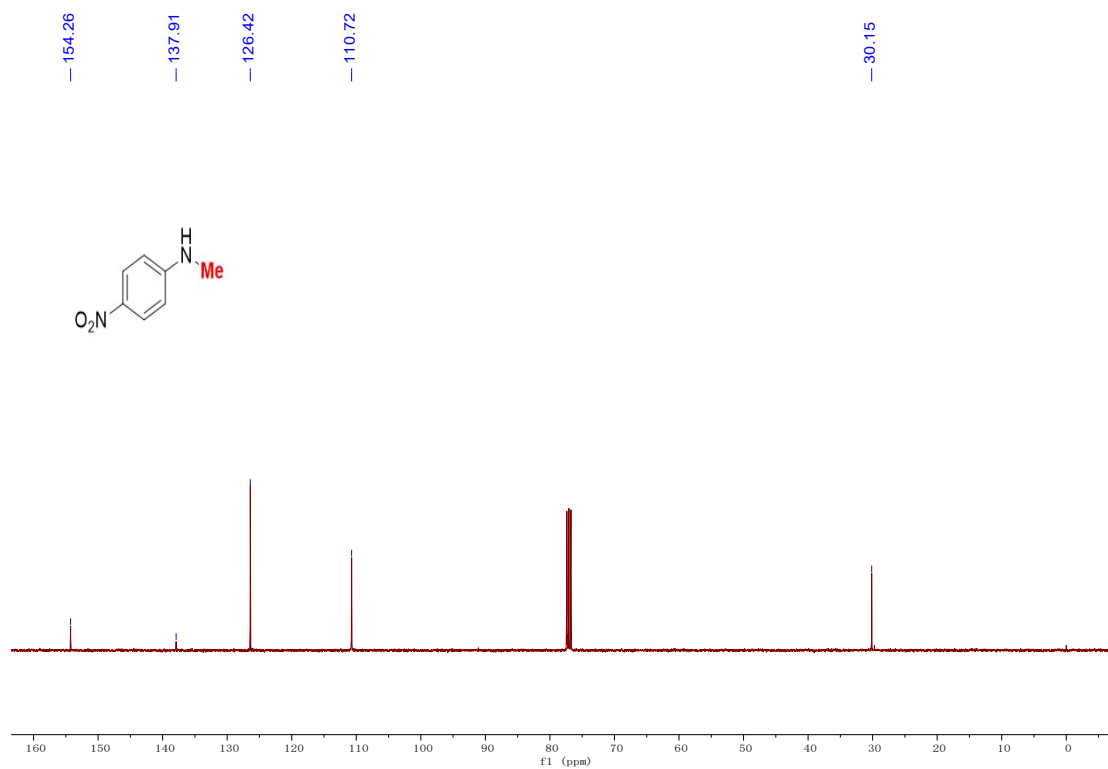

Figure S63: <sup>13</sup>C NMR (101 MHz, CDCl<sub>3</sub>, 298 K) spectrum for 11g

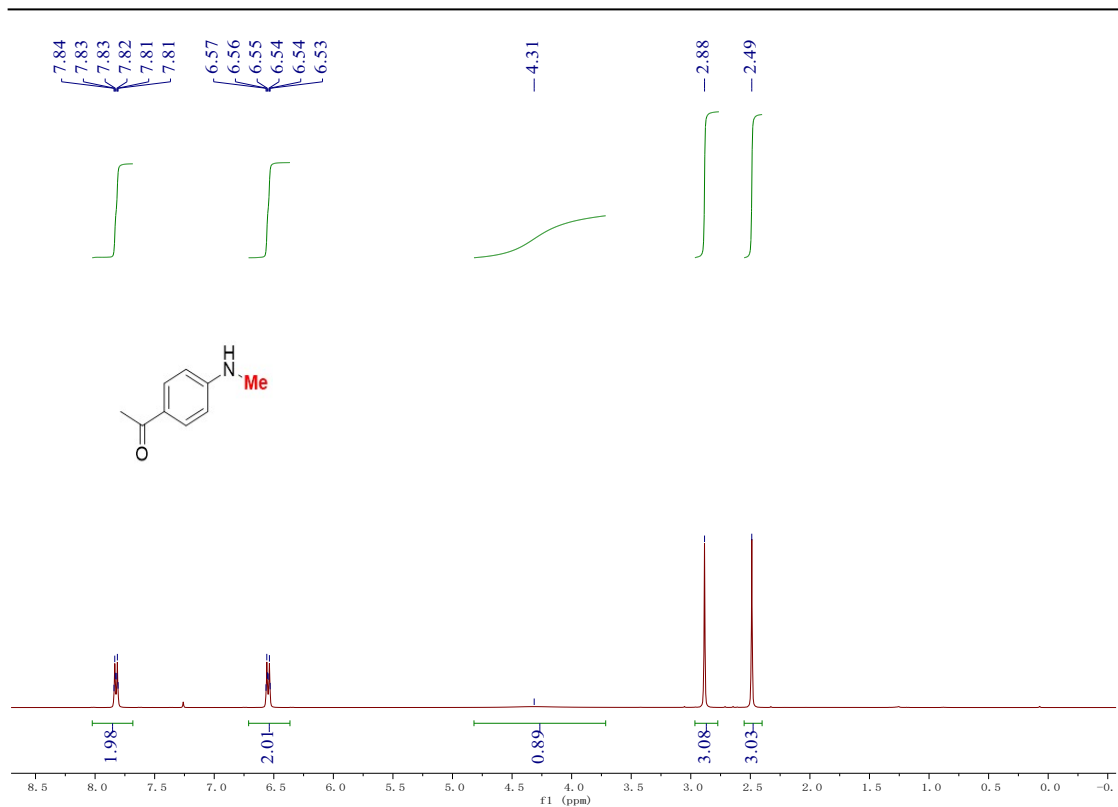

**Figure S64:** <sup>1</sup>H NMR (400 MHz, CDCl<sub>3</sub>, 298 K) spectrum for 11h

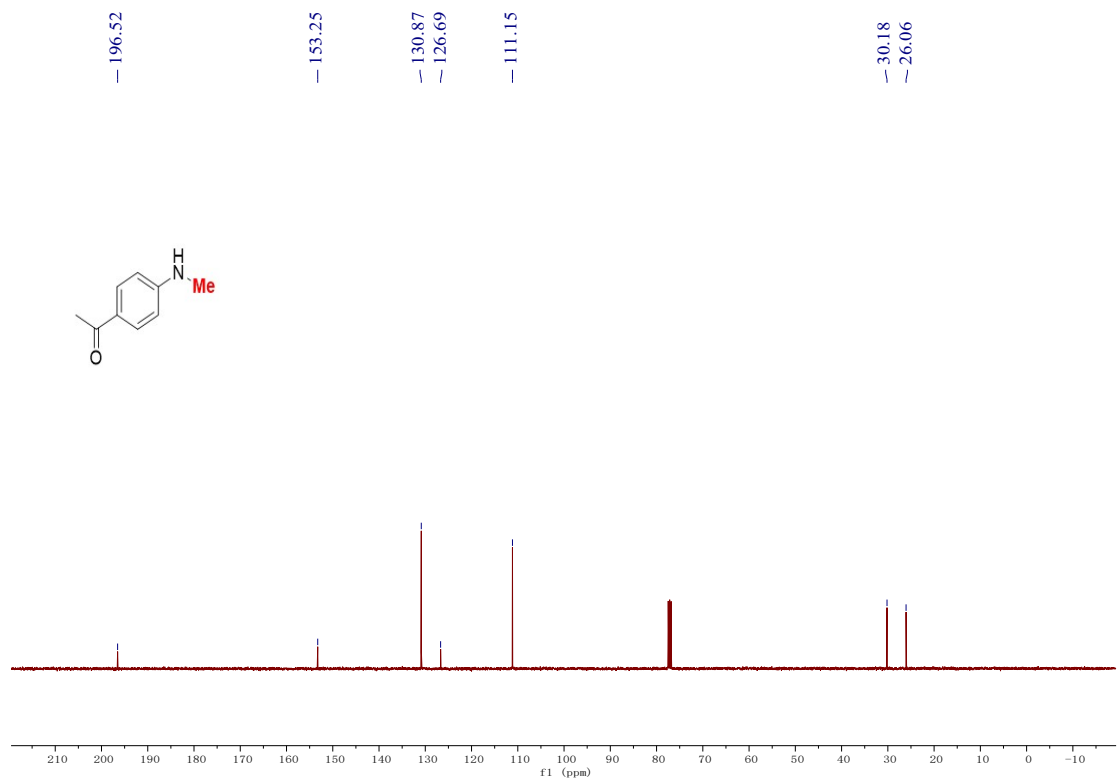

**Figure S65:** <sup>13</sup>C NMR (101 MHz, CDCl<sub>3</sub>, 298 K) spectrum for 11h

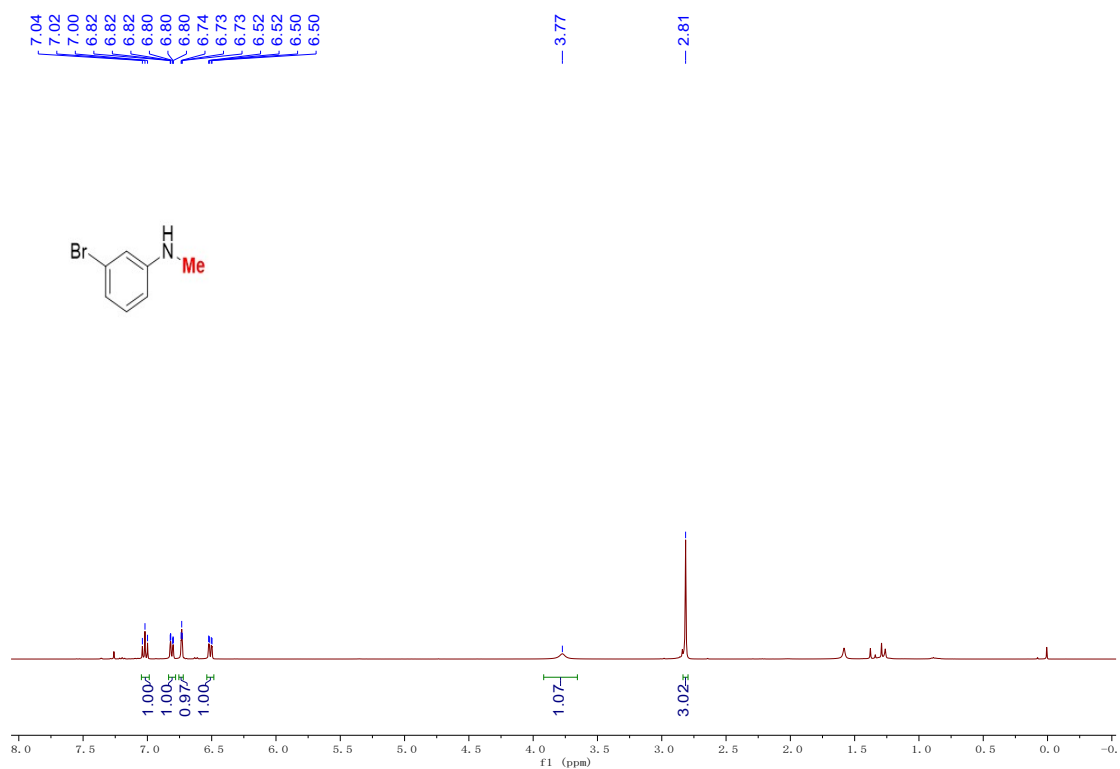

Figure S66: <sup>1</sup>H NMR (400 MHz, CDCl<sub>3</sub>, 298 K) spectrum for 11i

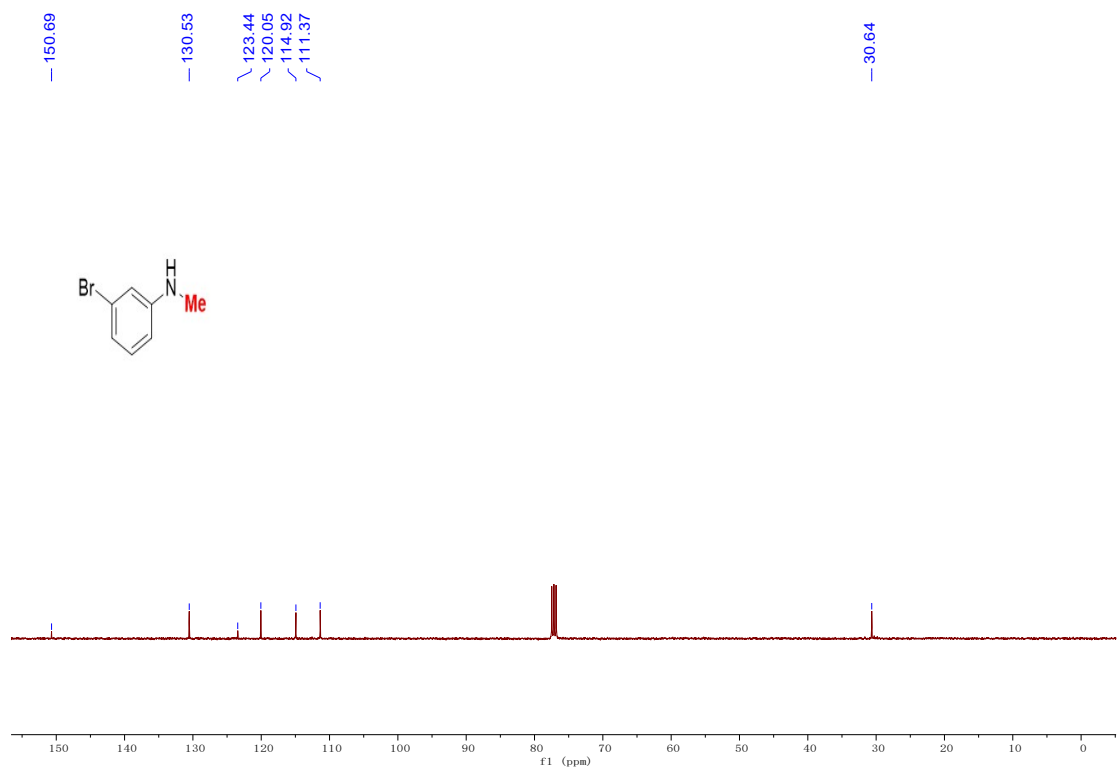

Figure S67: <sup>13</sup>C NMR (101 MHz, CDCl<sub>3</sub>, 298 K) spectrum for 11i

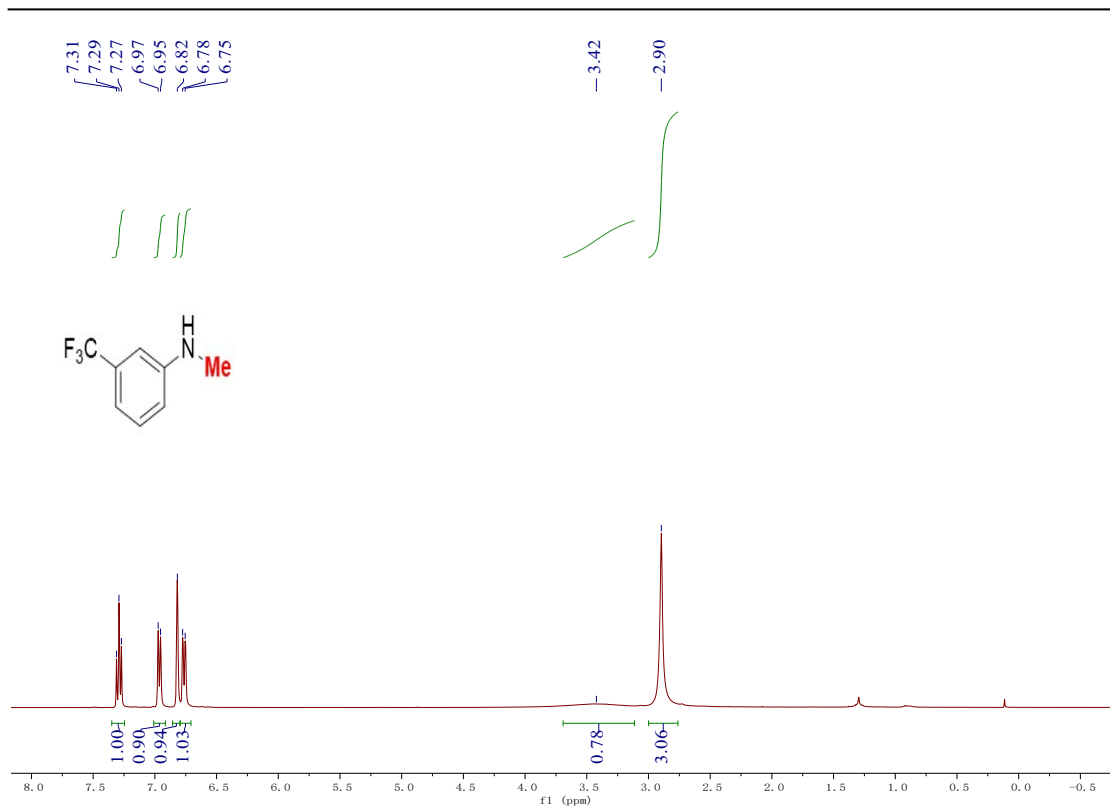

Figure S68: <sup>1</sup>H NMR (400 MHz, CDCl<sub>3</sub>, 298 K) spectrum for 11j

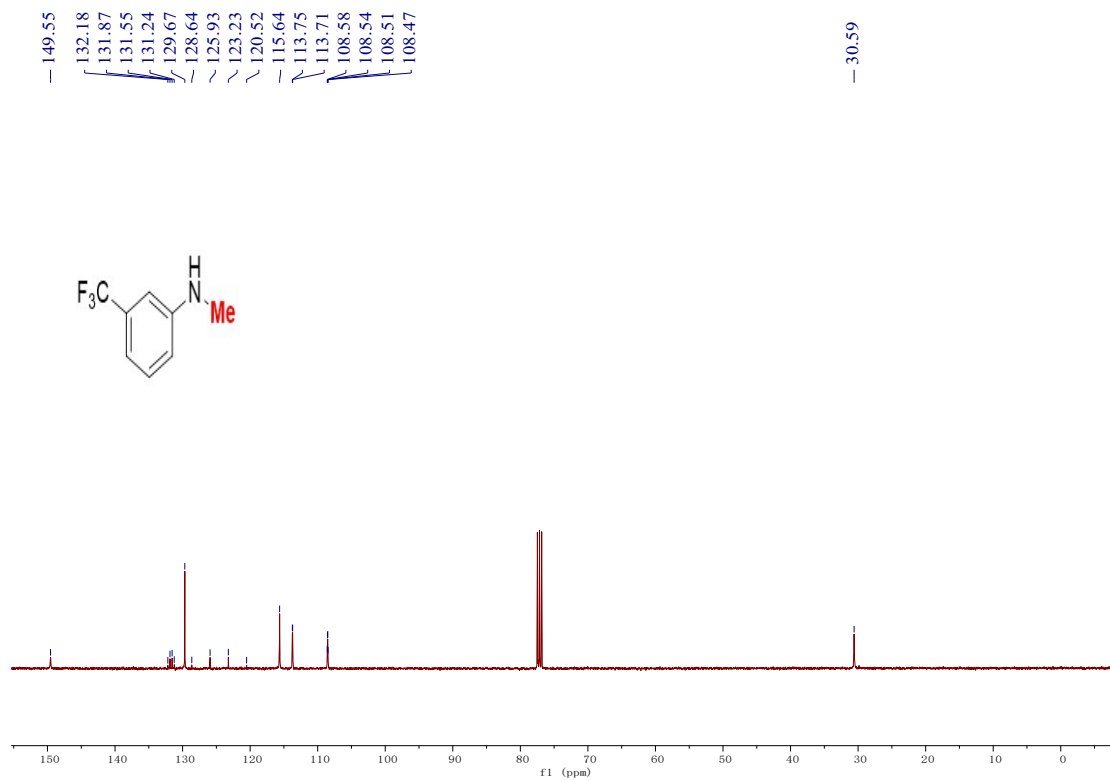

Figure S69: <sup>13</sup>C NMR (101 MHz, CDCl<sub>3</sub>, 298 K) spectrum for 11j



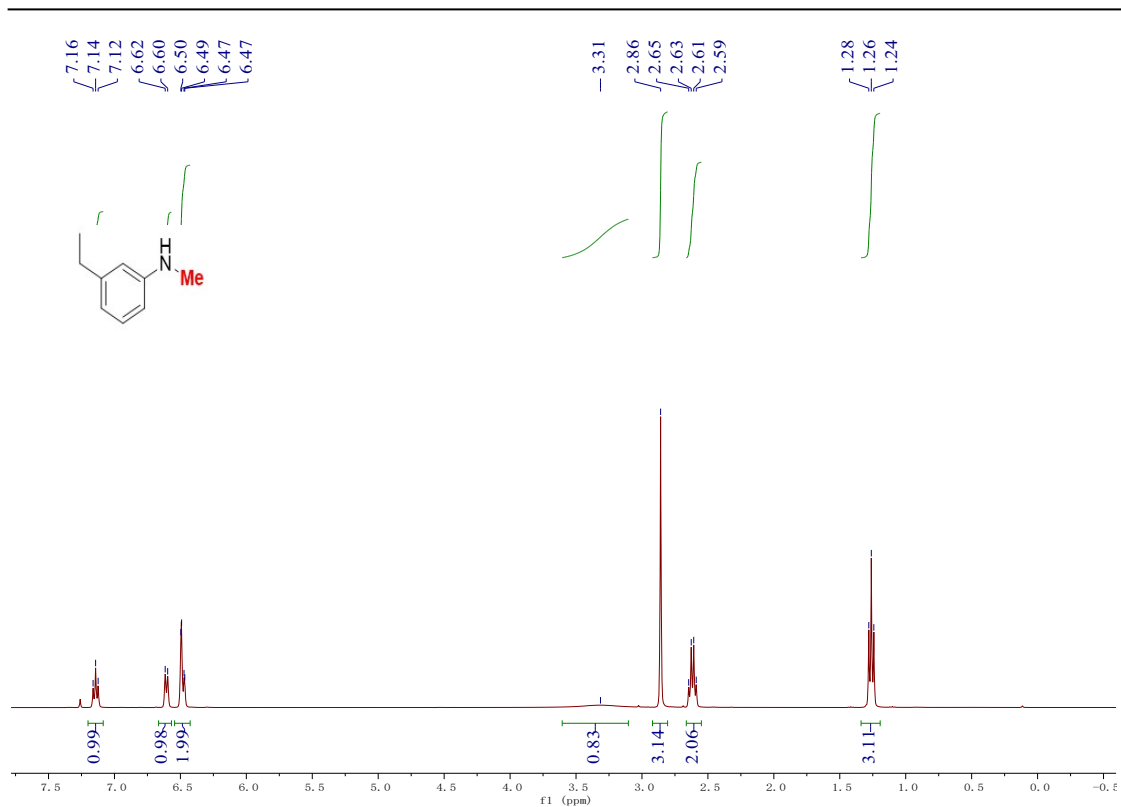

Figure S70: <sup>1</sup>H NMR (400 MHz, CDCl<sub>3</sub>, 298 K) spectrum for 11k

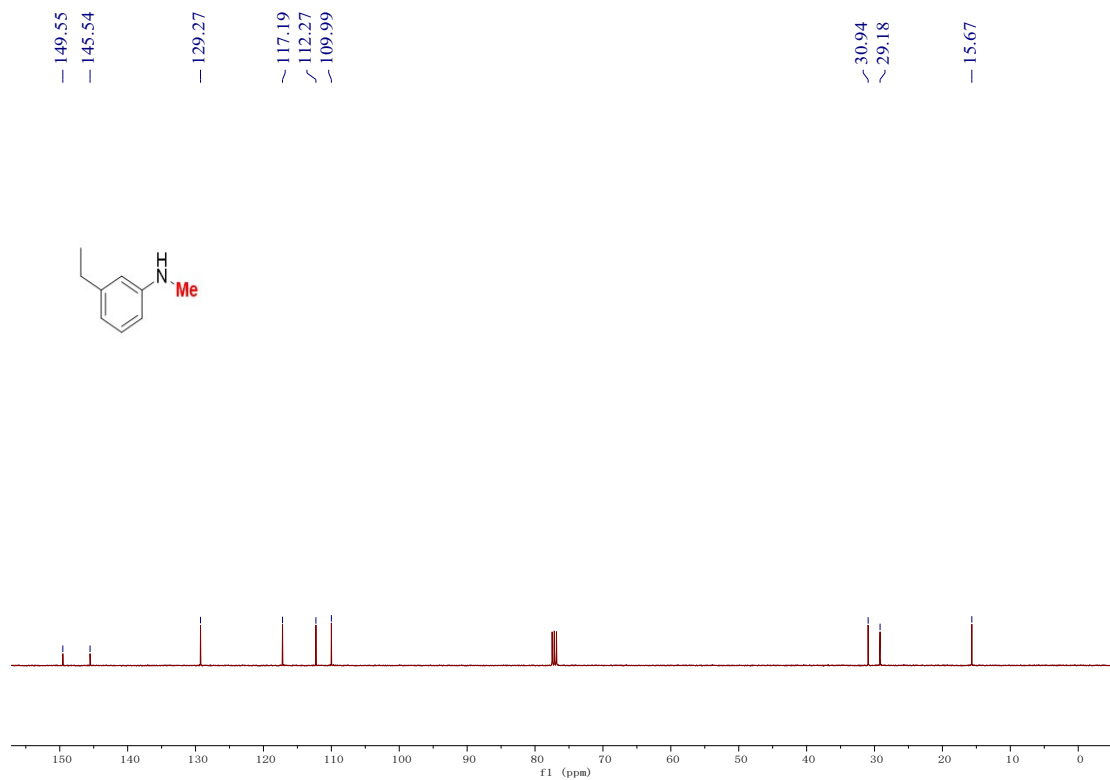

Figure S71: <sup>13</sup>C NMR (101 MHz, CDCl<sub>3</sub>, 298 K) spectrum for 11k

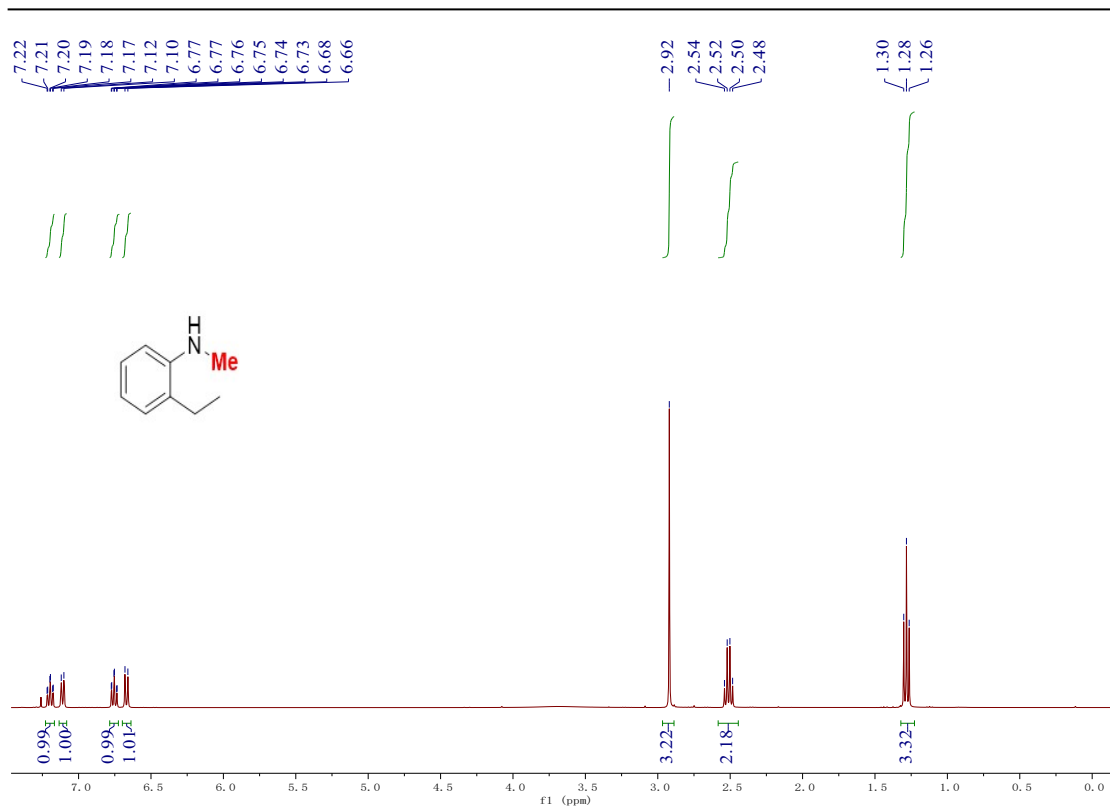

Figure S72: <sup>1</sup>H NMR (400 MHz, CDCl<sub>3</sub>, 298 K) spectrum for 11

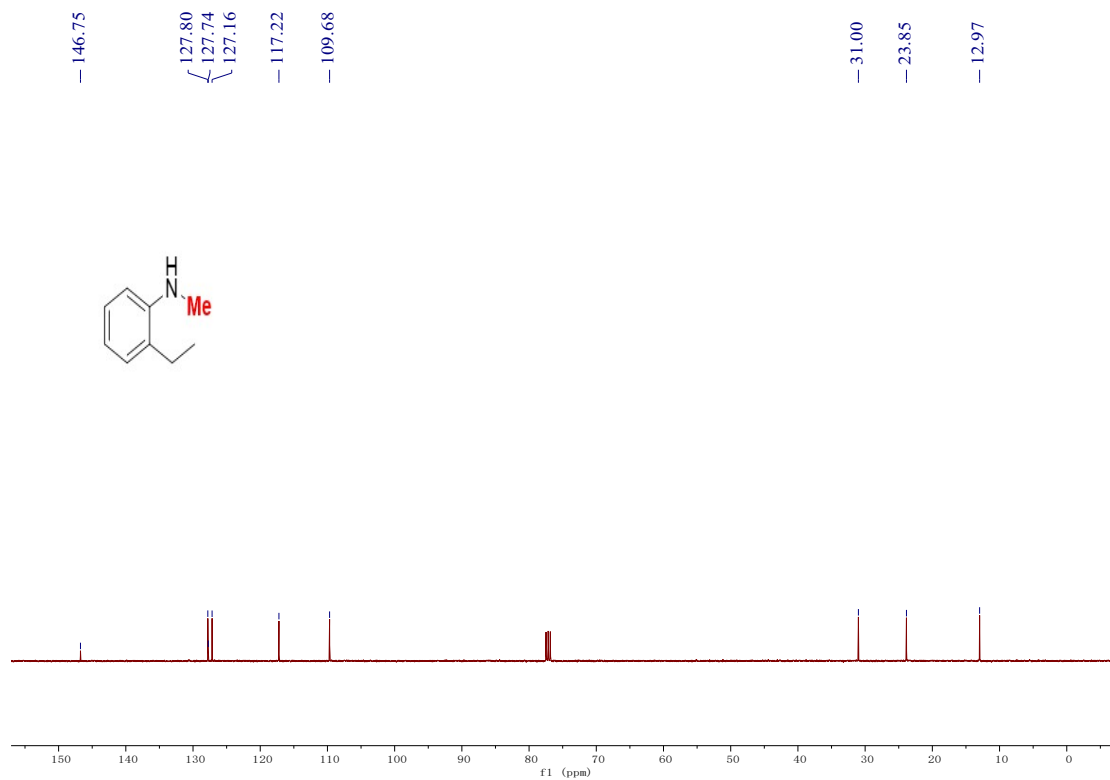

Figure S73: <sup>13</sup>C NMR (101 MHz, CDCl<sub>3</sub>, 298 K) spectrum for 11

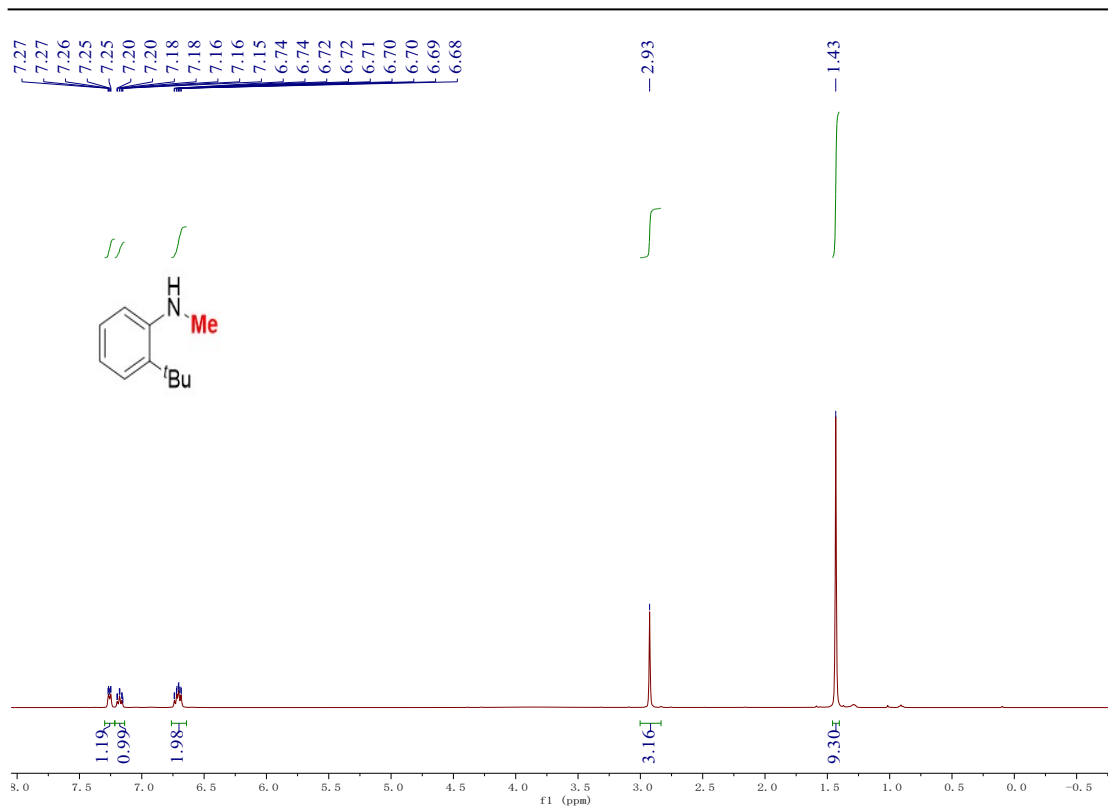

Figure S74: <sup>1</sup>H NMR (400 MHz, CDCl<sub>3</sub>, 298 K) spectrum for 11m

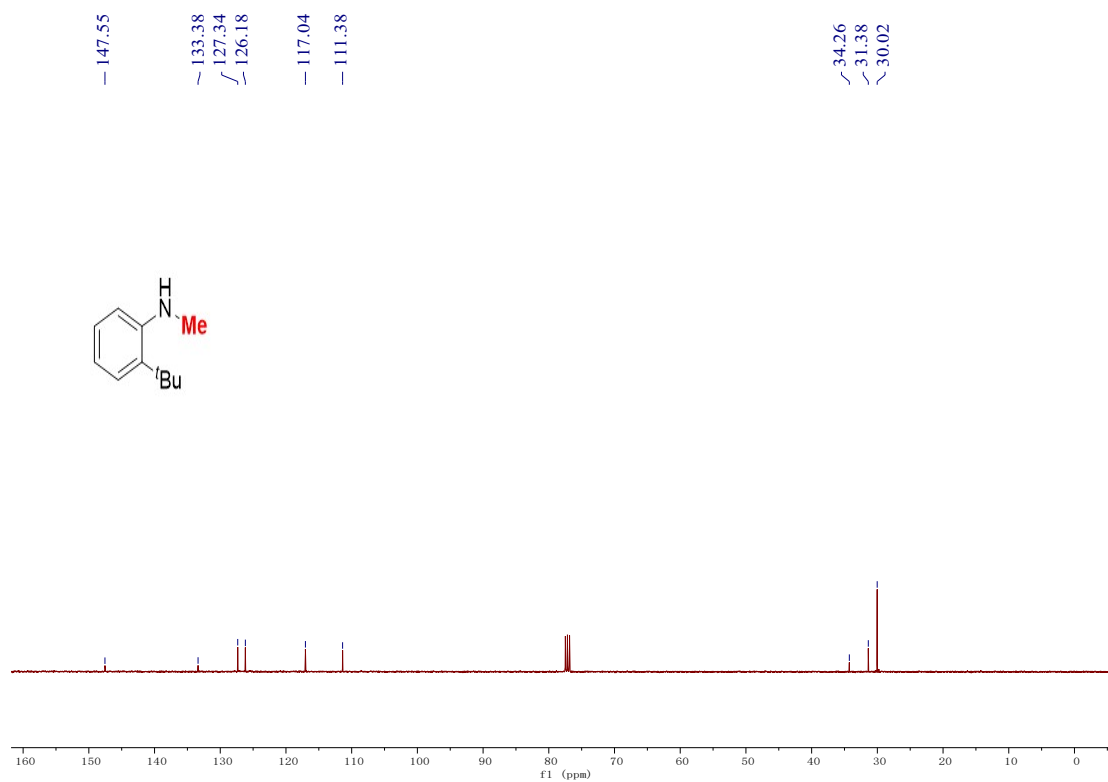

Figure S75: <sup>13</sup>C NMR (101 MHz, CDCl<sub>3</sub>, 298 K) spectrum for 11m

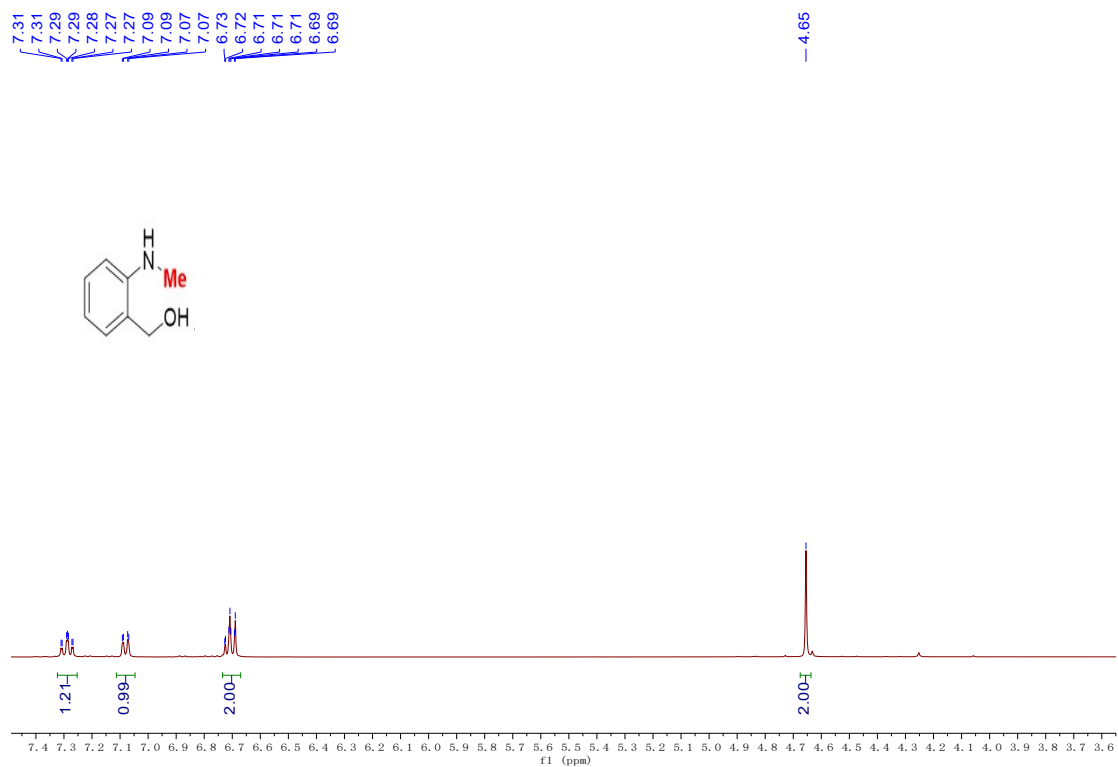

Figure S76: <sup>1</sup>H NMR (400 MHz, CDCl<sub>3</sub>, 298 K) spectrum for 11n

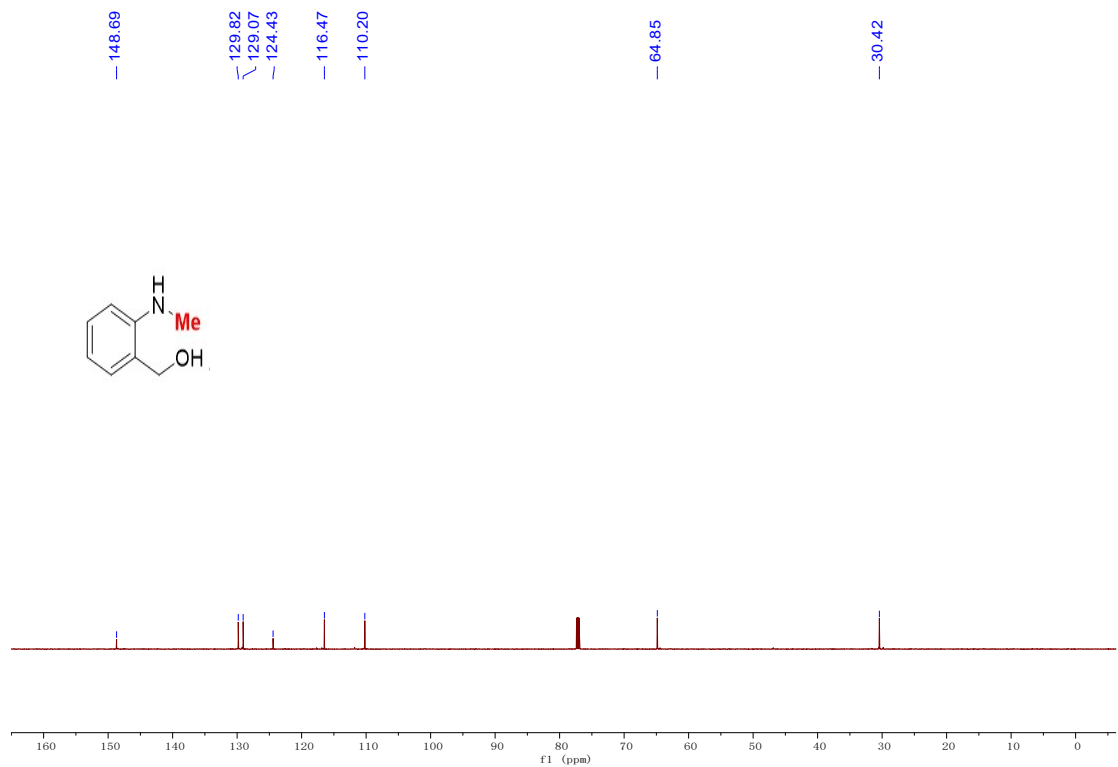

Figure S77: <sup>13</sup>C NMR (101 MHz, CDCl<sub>3</sub>, 298 K) spectrum for 11n

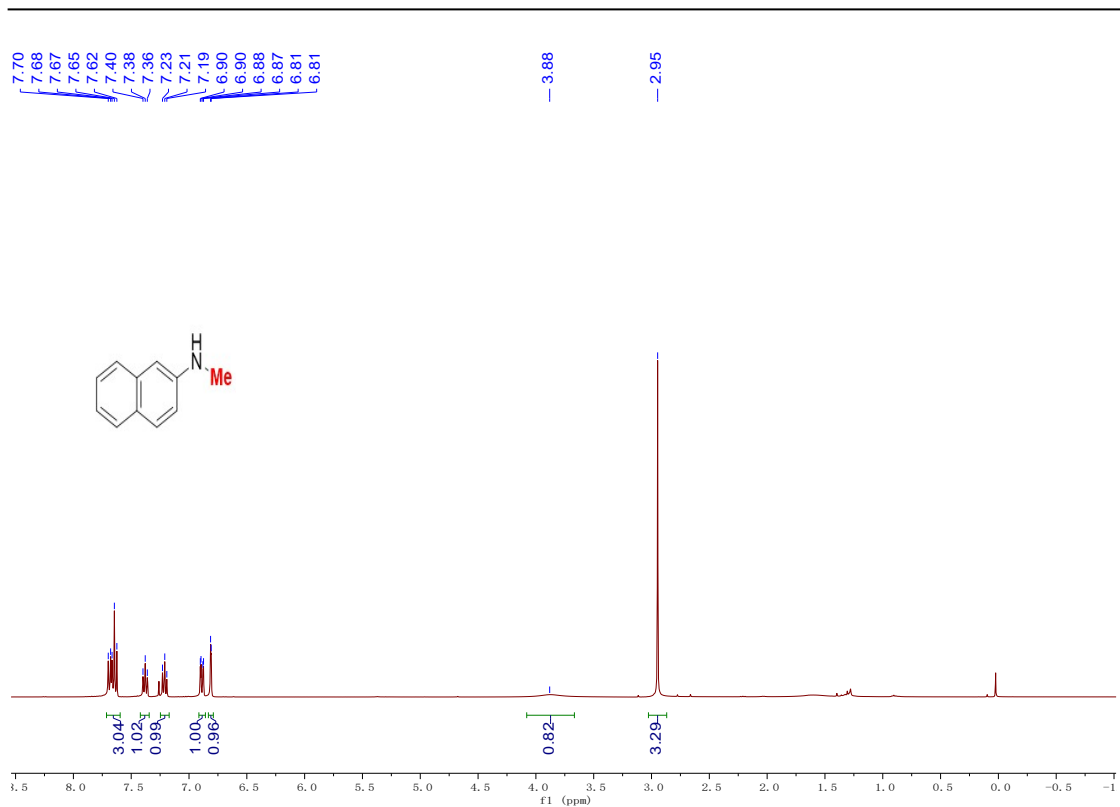

Figure S78: <sup>1</sup>H NMR (400 MHz, CDCl<sub>3</sub>, 298 K) spectrum for 11o

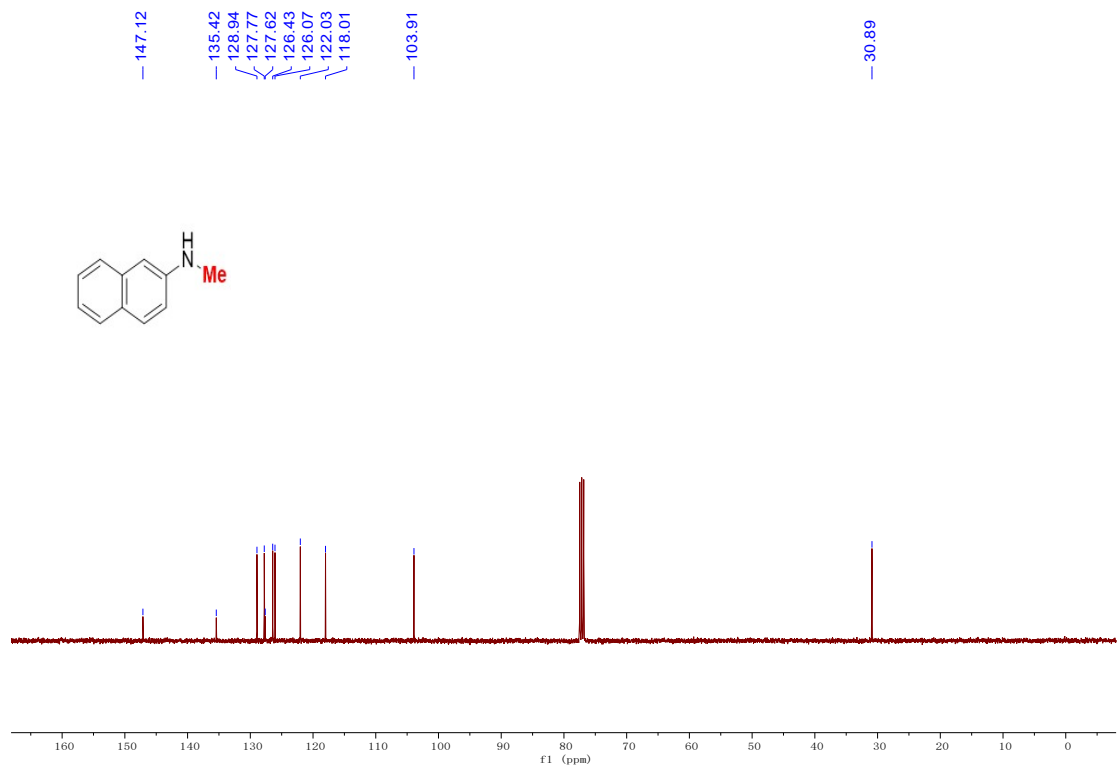

Figure S79: <sup>13</sup>C NMR (101 MHz, CDCl<sub>3</sub>, 298 K) spectrum for 11o

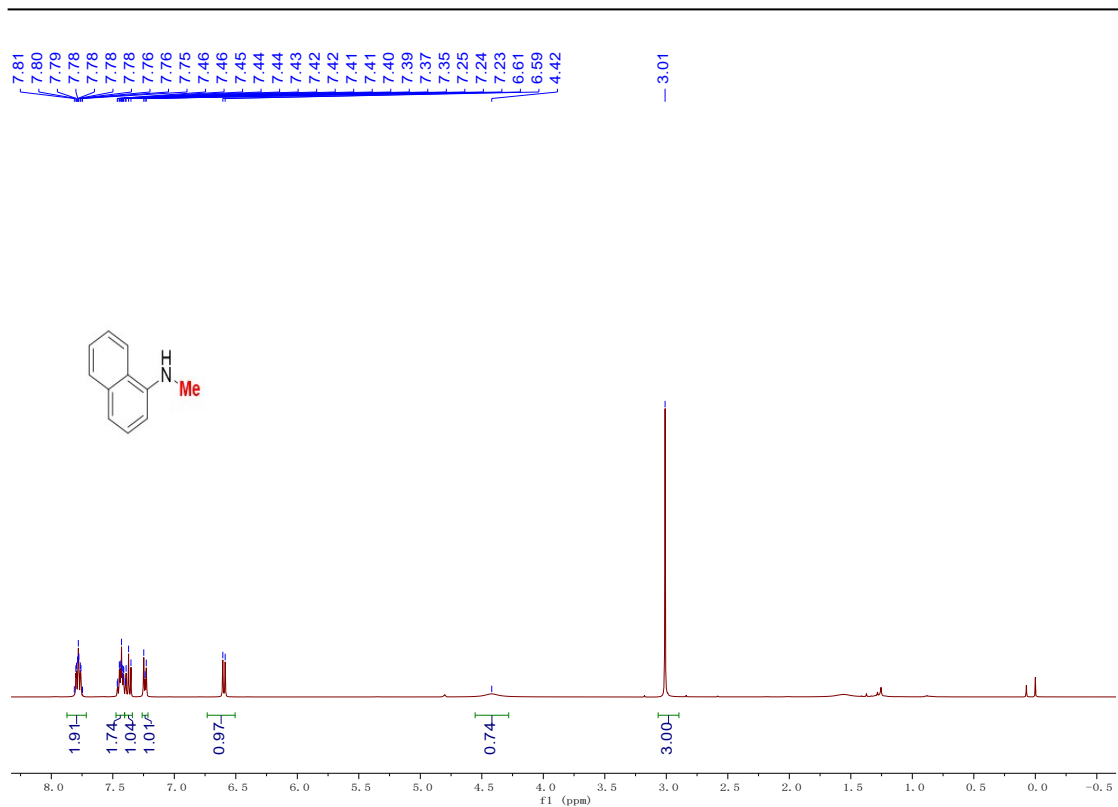

Figure S80: <sup>1</sup>H NMR (400 MHz, CDCl<sub>3</sub>, 298 K) spectrum for 11p

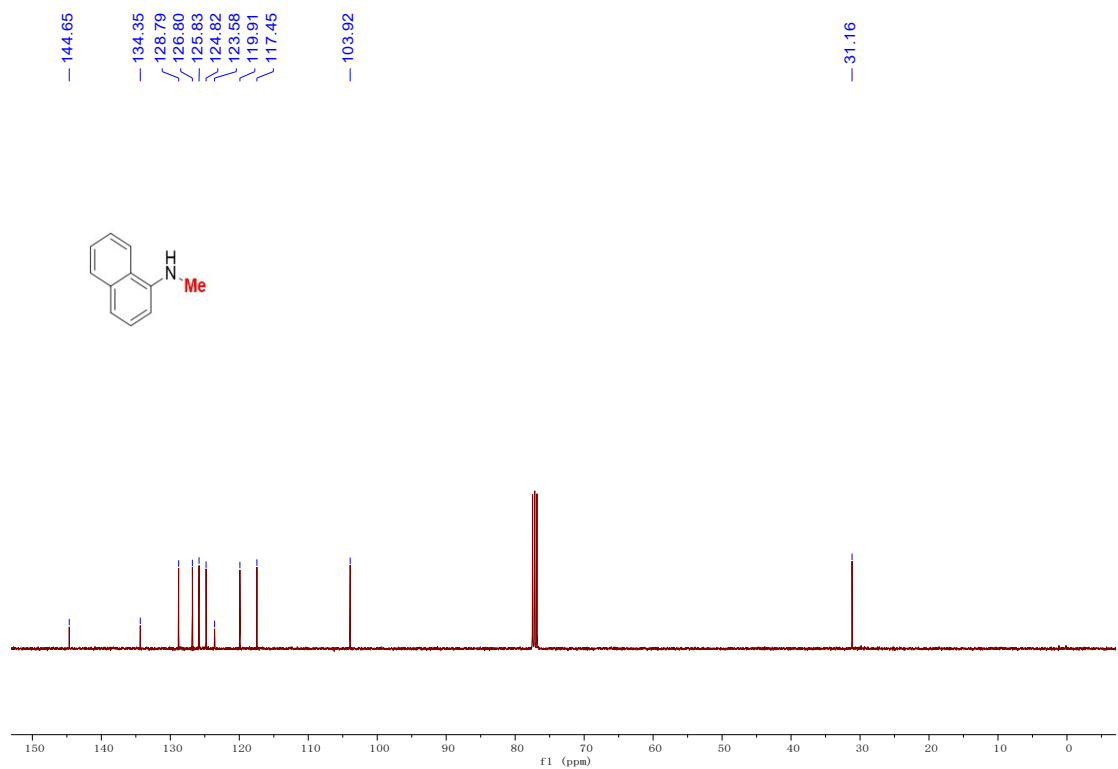

Figure S81: <sup>13</sup>C NMR (101 MHz, CDCl<sub>3</sub>, 298 K) spectrum for 11p

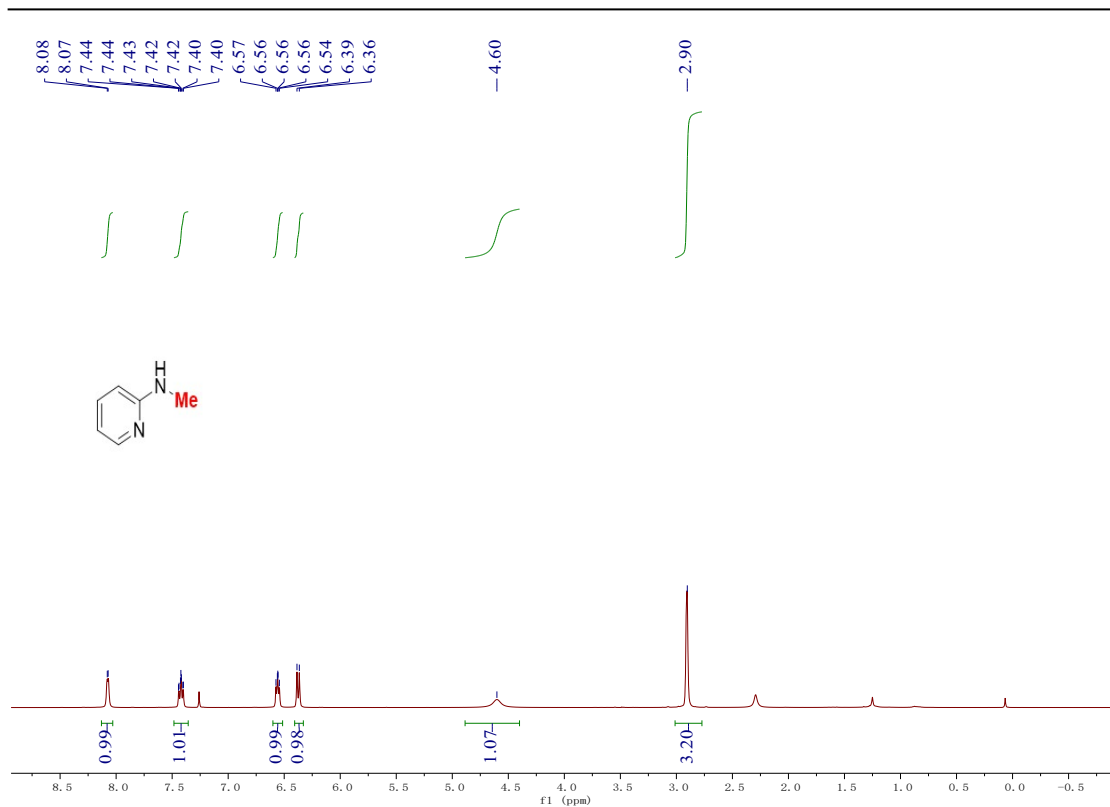

Figure S82: <sup>1</sup>H NMR (400 MHz, CDCl<sub>3</sub>, 298 K) spectrum for 11q

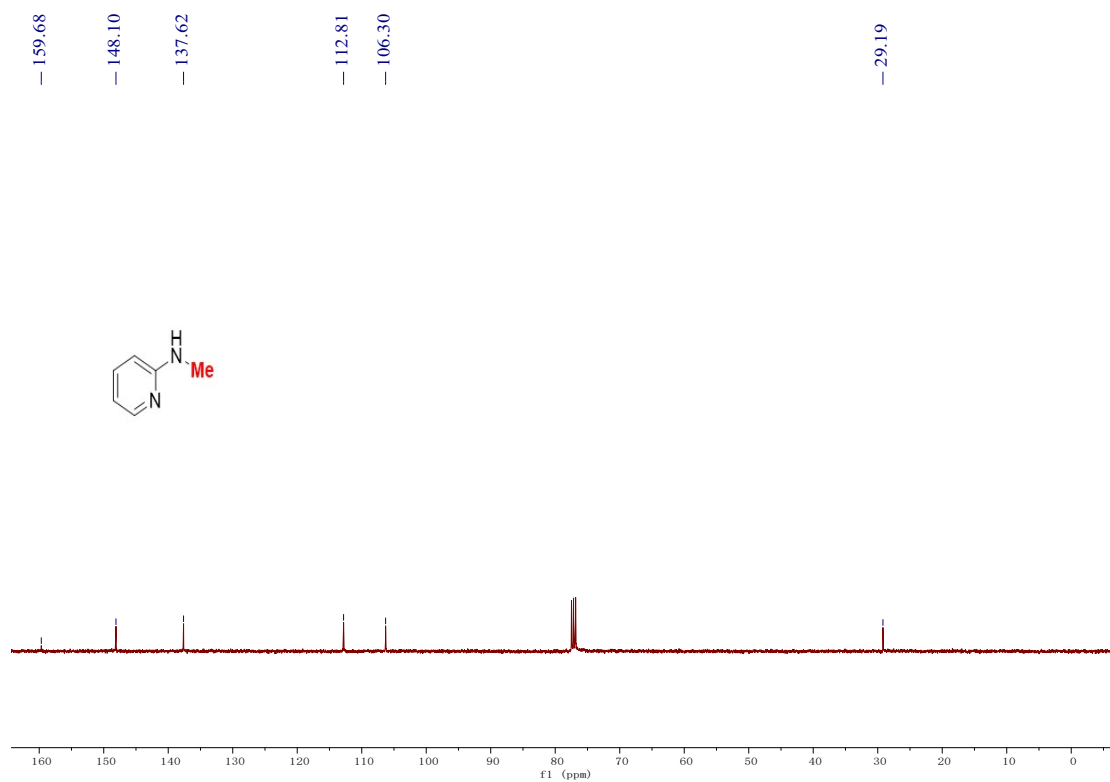

Figure S83: <sup>13</sup>C NMR (101 MHz, CDCl<sub>3</sub>, 298 K) spectrum for 11q

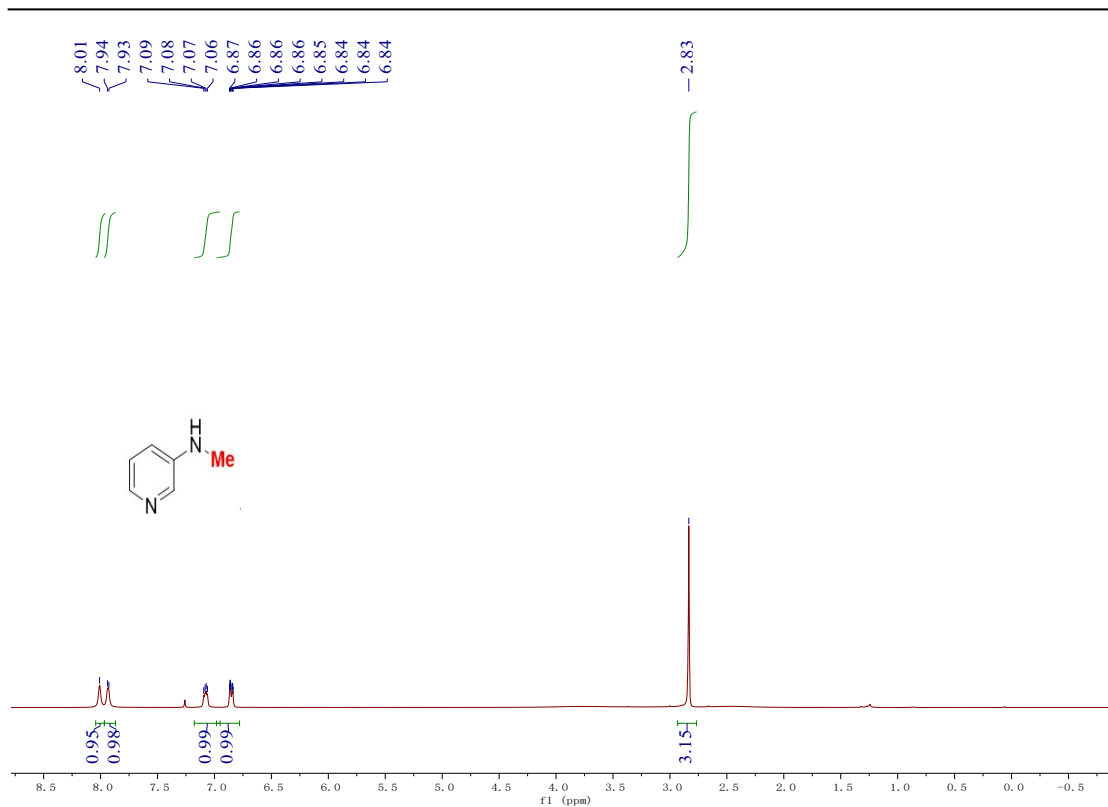

Figure S84: <sup>1</sup>H NMR (400 MHz, CDCl<sub>3</sub>, 298 K) spectrum for 11r

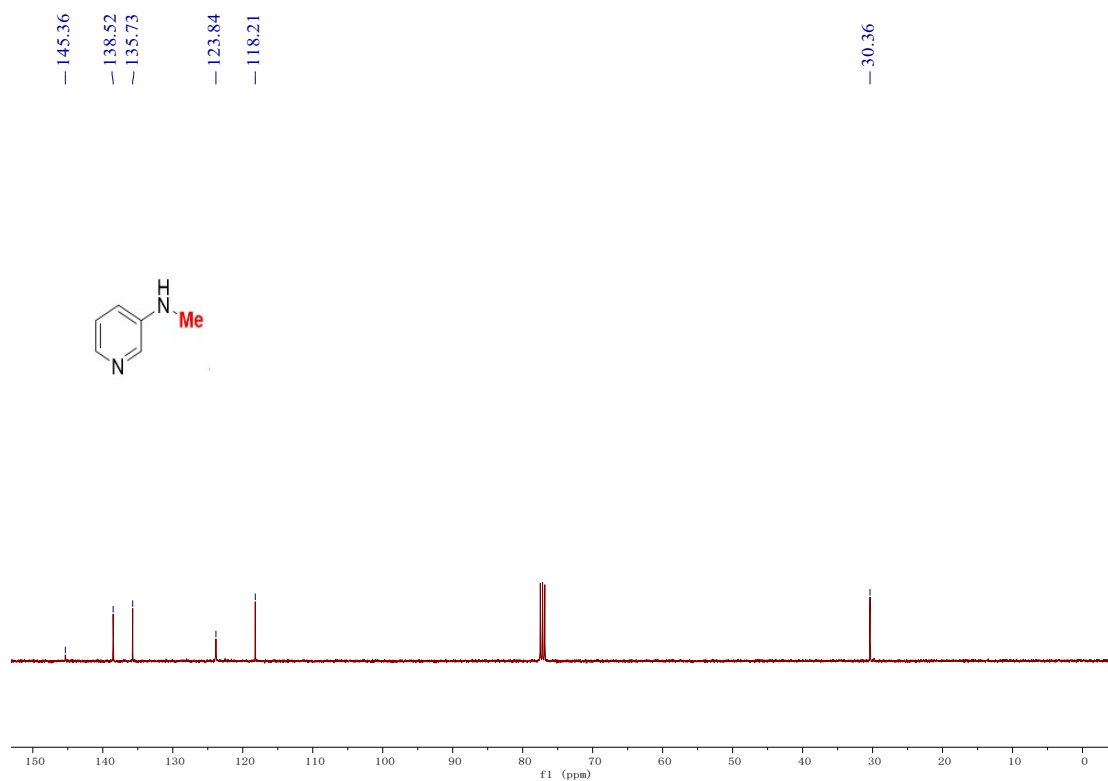

Figure S85: <sup>13</sup>C NMR (101 MHz, CDCl<sub>3</sub>, 298 K) spectrum for 11r



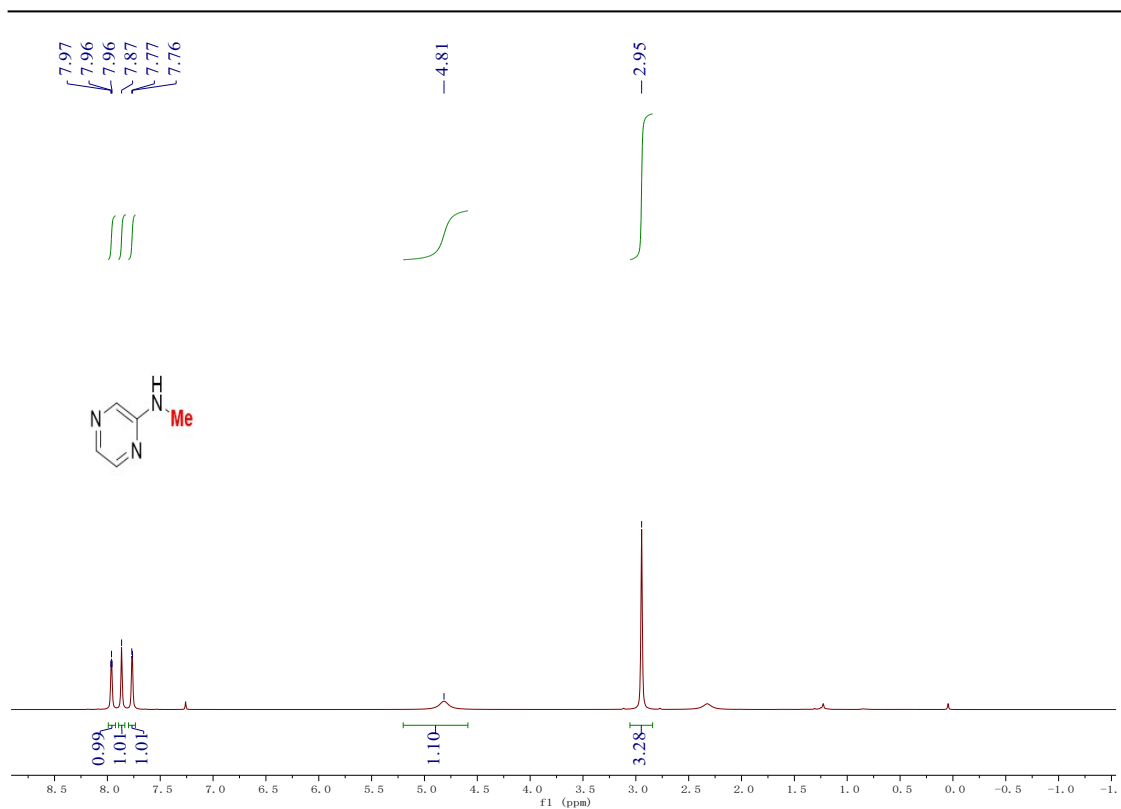

Figure S86: <sup>1</sup>H NMR (400 MHz, CDCl<sub>3</sub>, 298 K) spectrum for 11s

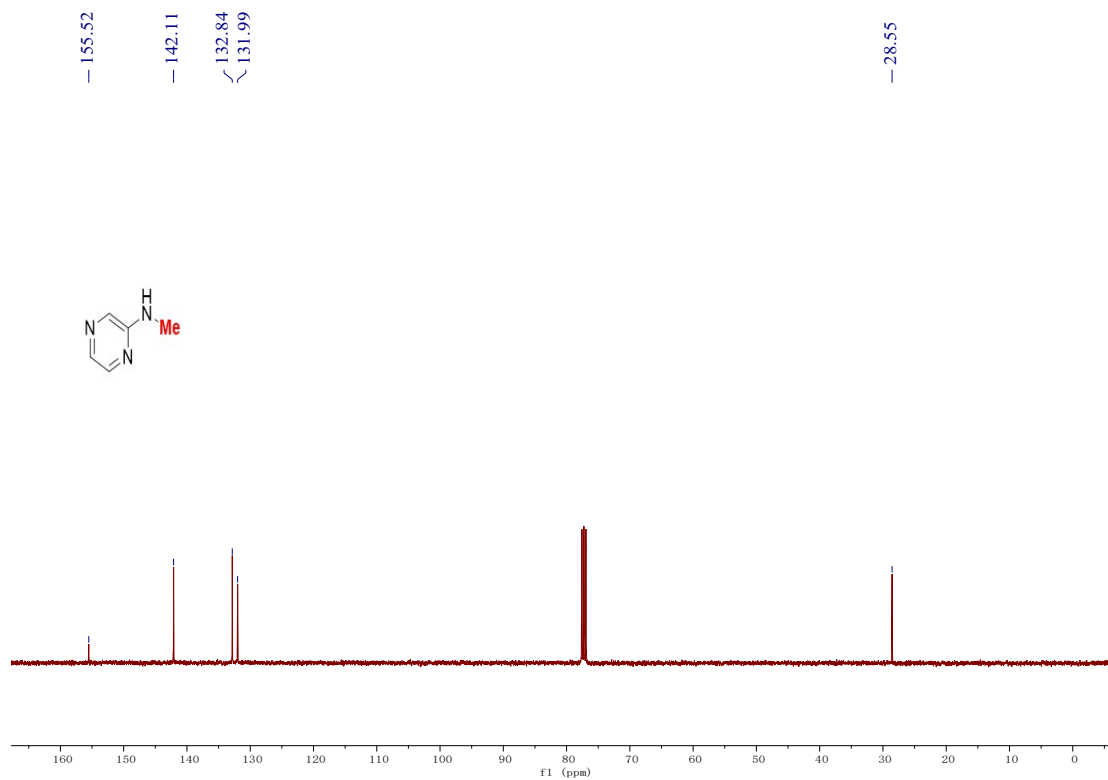

Figure S87: <sup>13</sup>C NMR (101 MHz, CDCl<sub>3</sub>, 298 K) spectrum for 11s

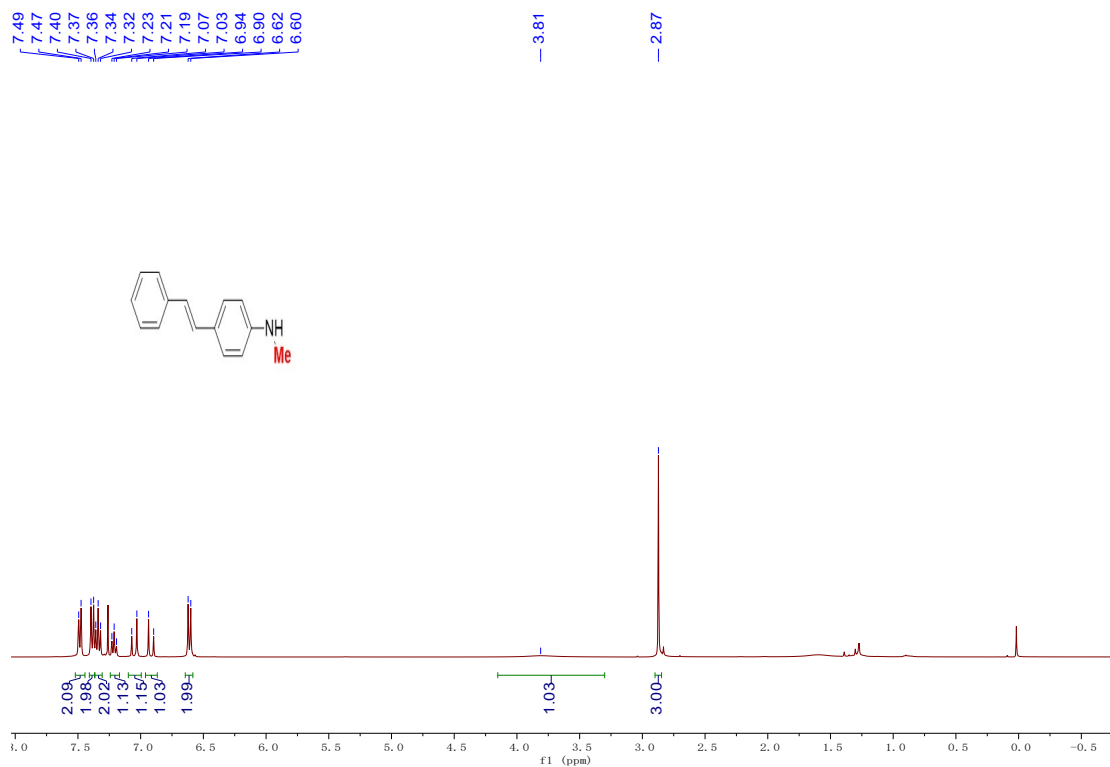

Figure S88: <sup>1</sup>H NMR (400 MHz, CDCl<sub>3</sub>, 298 K) spectrum for 11t

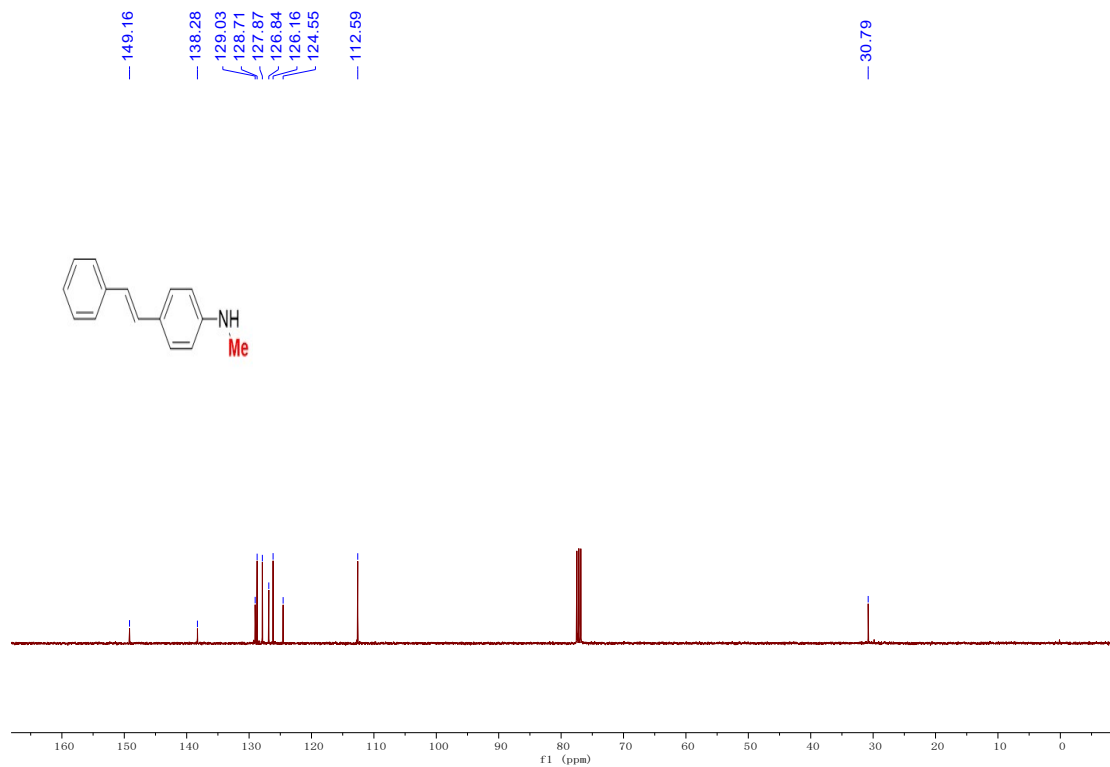

Figure S89: <sup>13</sup>C NMR (101 MHz, CDCl<sub>3</sub>, 298 K) spectrum for 11t

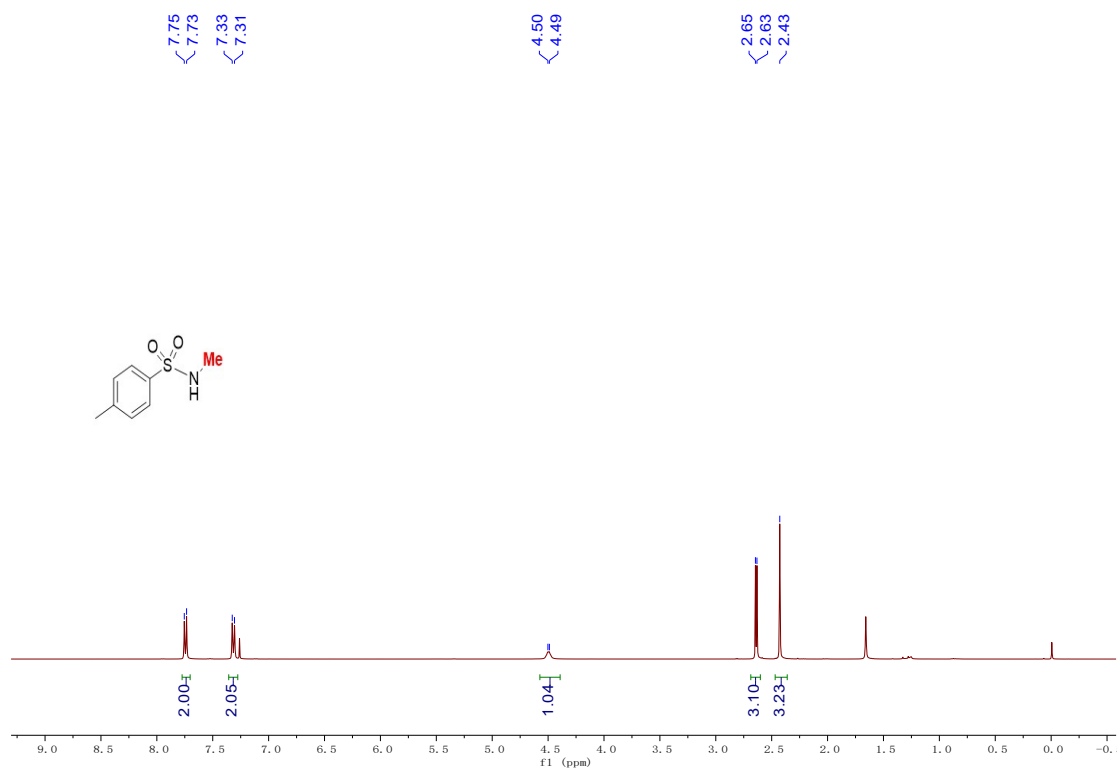

Figure S90:  $^1\text{H}$  NMR (400 MHz,  $\text{CDCl}_3$ , 298 K) spectrum for 11x

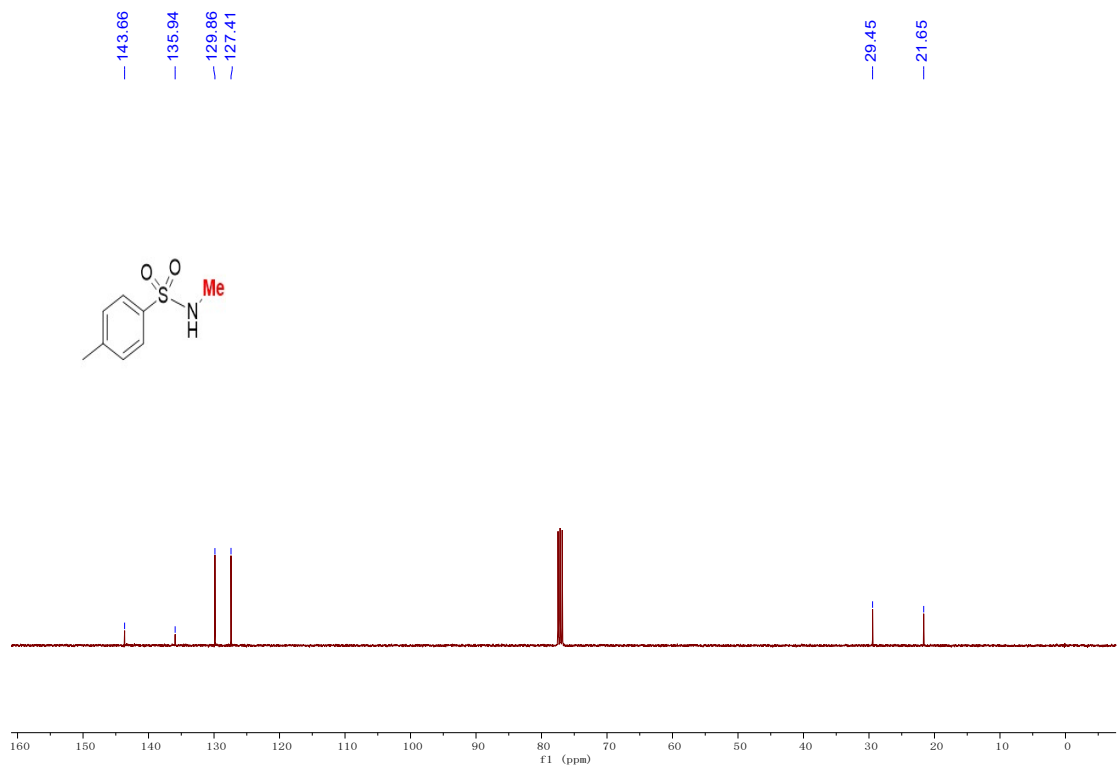

Figure S91:  $^{13}\text{C}$  NMR (101 MHz,  $\text{CDCl}_3$ , 298 K) spectrum for 11x

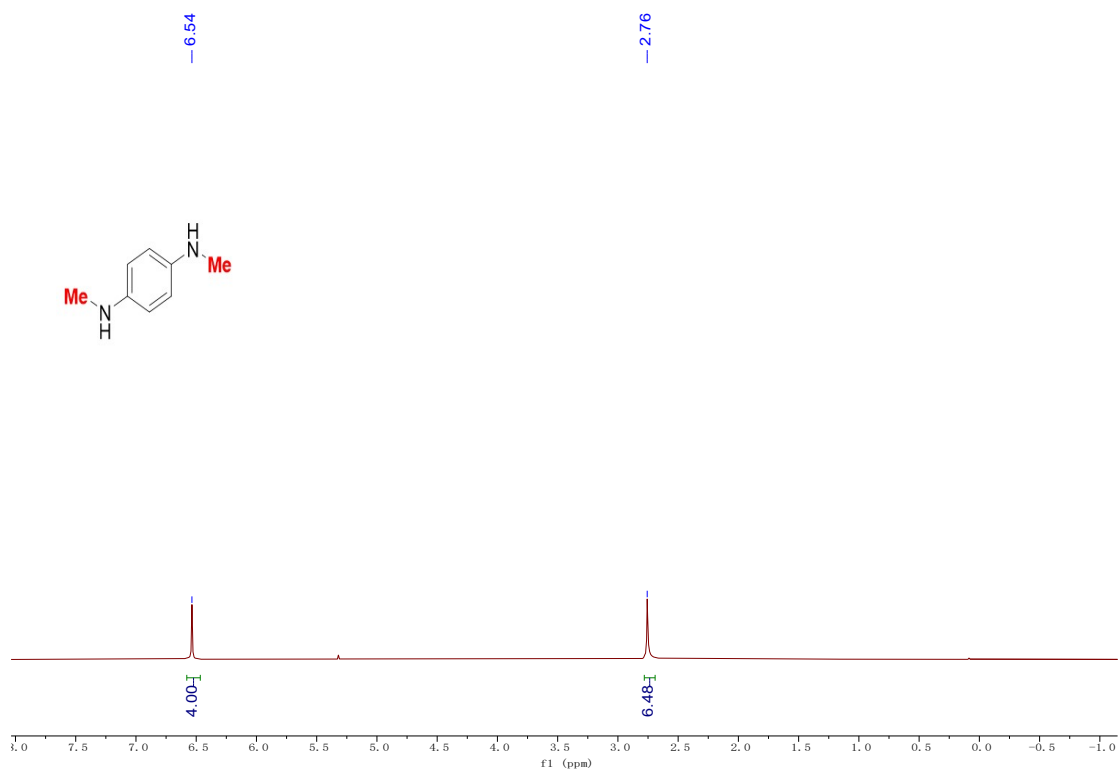

**Figure S92:** <sup>1</sup>H NMR (400 MHz, CD<sub>2</sub>Cl<sub>2</sub>, 298 K) spectrum for **11aa**

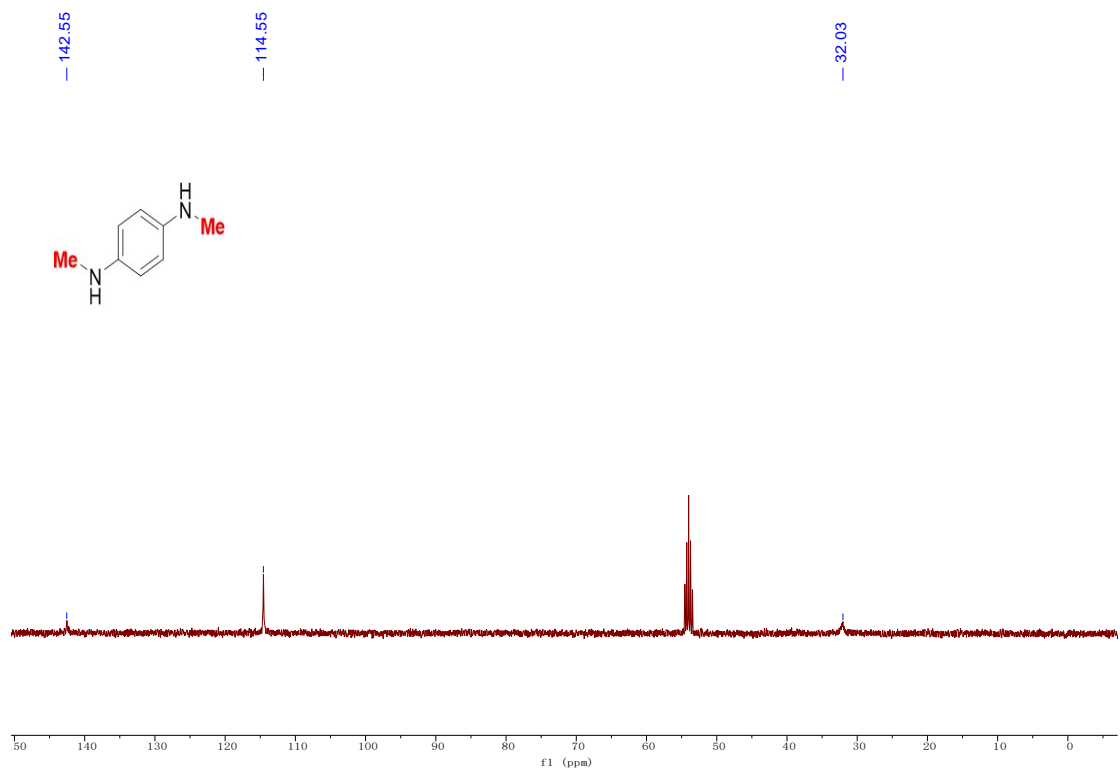

**Figure S93:** <sup>13</sup>C NMR (101 MHz, CD<sub>2</sub>Cl<sub>2</sub>, 298 K) spectrum for **11aa**
